# Supplementary material for: A New Approach for Reconstruction of IMFs of Decomposition and Ensemble Model for Forecasting Crude Oil Prices
Source: Hindawi journal article supplement (doi:10.1155/2020/1325071), 2020-10-05
Supplement: f1 [file 1325071.f1.csv]

Daily Brent Crude oil prices Series		Daily WTI Crude oil prices Series		Weekly Brent Crude oil prices Series		Weekly WTI Crude oil prices Series
Days	Brent	Days	WTI	Week	Brent	Week	WTI
30/1/1970	2.23	10/1/1983	31.35	30/1/1970	2.23	10/1/1983	31.35
2/2/1970	2.23	11/1/1983	31.2	6/2/1970	2.23	17/1/1983	31.05
3/2/1970	2.23	12/1/1983	31.1	13/2/1970	2.23	24/1/1983	30.3
4/2/1970	2.23	13/1/1983	31.1	20/2/1970	2.23	31/1/1983	29.4
5/2/1970	2.23	14/1/1983	31.1	27/2/1970	2.23	7/2/1983	29.35
6/2/1970	2.23	17/1/1983	31.05	6/3/1970	2.23	14/2/1983	29.75
9/2/1970	2.23	18/1/1983	31.1	13/3/1970	2.23	21/2/1983	29.1
10/2/1970	2.23	19/1/1983	31.3	20/3/1970	2.23	28/2/1983	28.25
11/2/1970	2.23	20/1/1983	32.75	27/3/1970	2.23	7/3/1983	28.65
12/2/1970	2.23	21/1/1983	31.9	3/4/1970	2.23	14/3/1983	29.25
13/2/1970	2.23	24/1/1983	30.3	10/4/1970	2.23	21/3/1983	28.4
16/2/1970	2.23	25/1/1983	29.15	17/4/1970	2.23	28/3/1983	29.2
17/2/1970	2.23	26/1/1983	29.7	24/4/1970	2.23	4/4/1983	29.65
18/2/1970	2.23	27/1/1983	29.65	1/5/1970	2.23	11/4/1983	30.35
19/2/1970	2.23	28/1/1983	30.1	8/5/1970	2.23	18/4/1983	30.65
20/2/1970	2.23	31/1/1983	29.4	15/5/1970	2.23	25/4/1983	30.85
23/2/1970	2.23	1/2/1983	29	22/5/1970	2.23	2/5/1983	30.7
24/2/1970	2.23	2/2/1983	29.05	29/5/1970	2.23	9/5/1983	30.15
25/2/1970	2.23	3/2/1983	29.1	5/6/1970	2.23	16/5/1983	30
26/2/1970	2.23	4/2/1983	29.35	12/6/1970	2.23	23/5/1983	30.35
27/2/1970	2.23	7/2/1983	29.35	19/6/1970	2.23	30/5/1983	30.35
2/3/1970	2.23	8/2/1983	29.6	26/6/1970	2.23	6/6/1983	30.35
3/3/1970	2.23	9/2/1983	29.6	3/7/1970	2.23	13/6/1983	31.05
4/3/1970	2.23	10/2/1983	29.65	10/7/1970	2.23	20/6/1983	31.55
5/3/1970	2.23	11/2/1983	29.65	17/7/1970	2.23	27/6/1983	31.15
6/3/1970	2.23	14/2/1983	29.75	24/7/1970	2.23	4/7/1983	31.35
9/3/1970	2.23	15/2/1983	29.65	31/7/1970	2.23	11/7/1983	31.6
10/3/1970	2.23	16/2/1983	29.65	7/8/1970	2.23	18/7/1983	31.75
11/3/1970	2.23	17/2/1983	29.45	14/8/1970	2.23	25/7/1983	31.45
12/3/1970	2.23	18/2/1983	29.1	21/8/1970	2.23	1/8/1983	32
13/3/1970	2.23	21/2/1983	29.1	28/8/1970	2.23	8/8/1983	32.1
16/3/1970	2.23	22/2/1983	27	4/9/1970	2.23	15/8/1983	32
17/3/1970	2.23	23/2/1983	27.8	11/9/1970	2.23	22/8/1983	31.65
18/3/1970	2.23	24/2/1983	28.6	18/9/1970	2.23	29/8/1983	31.7
19/3/1970	2.23	25/2/1983	28.4	25/9/1970	2.23	5/9/1983	31.65
20/3/1970	2.23	28/2/1983	28.25	2/10/1970	2.23	12/9/1983	31.2
23/3/1970	2.23	1/3/1983	28.5	9/10/1970	2.23	19/9/1983	31.45
24/3/1970	2.23	2/3/1983	28.8	16/10/1970	2.23	26/9/1983	31.3
25/3/1970	2.23	3/3/1983	28.7	23/10/1970	2.23	3/10/1983	30
26/3/1970	2.23	4/3/1983	28.6	30/10/1970	2.23	10/10/1983	30.85
27/3/1970	2.23	7/3/1983	28.65	6/11/1970	2.23	17/10/1983	30.5
30/3/1970	2.23	8/3/1983	28.2	13/11/1970	2.23	24/10/1983	30.45
31/3/1970	2.23	9/3/1983	28.2	20/11/1970	2.23	31/10/1983	30.25
1/4/1970	2.23	10/3/1983	28.9	27/11/1970	2.23	7/11/1983	30.4
2/4/1970	2.23	11/3/1983	28.4	4/12/1970	2.23	14/11/1983	30.1
3/4/1970	2.23	14/3/1983	29.25	11/12/1970	2.23	21/11/1983	29.5
6/4/1970	2.23	15/3/1983	29	18/12/1970	2.23	28/11/1983	29.87
7/4/1970	2.23	16/3/1983	28.85	25/12/1970	2.23	5/12/1983	29.4
8/4/1970	2.23	17/3/1983	28.7	1/1/1971	2.23	12/12/1983	29.4
9/4/1970	2.23	18/3/1983	28.4	8/1/1971	2.23	19/12/1983	28.62
10/4/1970	2.23	21/3/1983	28.4	15/1/1971	2.23	26/12/1983	29.07
13/4/1970	2.23	22/3/1983	28.45	22/1/1971	2.23	2/1/1984	29.65
14/4/1970	2.23	23/3/1983	28.45	29/1/1971	2.55	9/1/1984	29.3
15/4/1970	2.23	24/3/1983	28.5	5/2/1971	2.55	16/1/1984	29.75
16/4/1970	2.23	25/3/1983	28.5	12/2/1971	2.55	23/1/1984	29.75
17/4/1970	2.23	28/3/1983	29.2	19/2/1971	2.55	30/1/1984	29.97
20/4/1970	2.23	29/3/1983	29.6	26/2/1971	2.55	6/2/1984	30.2
21/4/1970	2.23	30/3/1983	29.6	5/3/1971	2.55	13/2/1984	29.6
22/4/1970	2.23	31/3/1983	29.6	12/3/1971	2.55	20/2/1984	30.12
23/4/1970	2.23	1/4/1983	29.6	19/3/1971	2.55	27/2/1984	30.2
24/4/1970	2.23	4/4/1983	29.65	26/3/1971	2.55	5/3/1984	30.75
27/4/1970	2.23	5/4/1983	29.85	2/4/1971	2.55	12/3/1984	30.87
28/4/1970	2.23	6/4/1983	30	9/4/1971	2.55	19/3/1984	30.6
29/4/1970	2.23	7/4/1983	30.15	16/4/1971	2.55	26/3/1984	30.65
30/4/1970	2.23	8/4/1983	30.45	23/4/1971	2.55	2/4/1984	30.75
1/5/1970	2.23	11/4/1983	30.35	30/4/1971	3.45	9/4/1984	30.75
4/5/1970	2.23	12/4/1983	30.7	7/5/1971	3.45	16/4/1984	30.65
5/5/1970	2.23	13/4/1983	30.75	14/5/1971	3.45	23/4/1984	30.5
6/5/1970	2.23	14/4/1983	30.75	21/5/1971	3.45	30/4/1984	30.25
7/5/1970	2.23	15/4/1983	30.55	28/5/1971	3.45	7/5/1984	30.25
8/5/1970	2.23	18/4/1983	30.65	4/6/1971	3.45	14/5/1984	30.55
11/5/1970	2.23	19/4/1983	30.65	11/6/1971	3.45	21/5/1984	30.75
12/5/1970	2.23	20/4/1983	30.6	18/6/1971	3.45	28/5/1984	30.6
13/5/1970	2.23	21/4/1983	30.5	25/6/1971	3.45	4/6/1984	30.7
14/5/1970	2.23	22/4/1983	30.55	2/7/1971	3.45	11/6/1984	30.2
15/5/1970	2.23	25/4/1983	30.85	9/7/1971	3.45	18/6/1984	29.8
18/5/1970	2.23	26/4/1983	30.8	16/7/1971	3.45	25/6/1984	29.55
19/5/1970	2.23	27/4/1983	30.8	23/7/1971	3.45	2/7/1984	29.6
20/5/1970	2.23	28/4/1983	30.75	30/7/1971	3.42	9/7/1984	29.5
21/5/1970	2.23	29/4/1983	30.8	6/8/1971	3.42	16/7/1984	28.9
22/5/1970	2.23	2/5/1983	30.7	13/8/1971	3.42	23/7/1984	28.3
25/5/1970	2.23	3/5/1983	30.6	20/8/1971	3.42	30/7/1984	27.65
26/5/1970	2.23	4/5/1983	30.65	27/8/1971	3.42	6/8/1984	28.95
27/5/1970	2.23	5/5/1983	30.25	3/9/1971	3.42	13/8/1984	29.05
28/5/1970	2.23	6/5/1983	30.25	10/9/1971	3.42	20/8/1984	29.1
29/5/1970	2.23	9/5/1983	30.15	17/9/1971	3.42	27/8/1984	29.85
1/6/1970	2.23	10/5/1983	30.05	24/9/1971	3.42	3/9/1984	29.3
2/6/1970	2.23	11/5/1983	30	1/10/1971	3.42	10/9/1984	29.25
3/6/1970	2.23	12/5/1983	29.85	8/10/1971	3.42	17/9/1984	29.2
4/6/1970	2.23	13/5/1983	29.8	15/10/1971	3.42	24/9/1984	29.25
5/6/1970	2.23	16/5/1983	30	22/10/1971	3.42	1/10/1984	29.65
8/6/1970	2.23	17/5/1983	30.05	29/10/1971	3.4	8/10/1984	29.35
9/6/1970	2.23	18/5/1983	29.7	5/11/1971	3.4	15/10/1984	28.75
10/6/1970	2.23	19/5/1983	29.85	12/11/1971	3.4	22/10/1984	28.35
11/6/1970	2.23	20/5/1983	30.35	19/11/1971	3.4	29/10/1984	28.4
12/6/1970	2.23	23/5/1983	30.35	26/11/1971	3.4	5/11/1984	28.5
15/6/1970	2.23	24/5/1983	30.05	3/12/1971	3.4	12/11/1984	28.45
16/6/1970	2.23	25/5/1983	30.1	10/12/1971	3.4	19/11/1984	27.85
17/6/1970	2.23	26/5/1983	30.4	17/12/1971	3.4	26/11/1984	27.15
18/6/1970	2.23	27/5/1983	30.35	24/12/1971	3.4	3/12/1984	27.3
19/6/1970	2.23	30/5/1983	30.35	31/12/1971	3.4	10/12/1984	27.45
22/6/1970	2.23	31/5/1983	30.3	7/1/1972	3.4	17/12/1984	26.6
23/6/1970	2.23	1/6/1983	30.35	14/1/1972	3.4	24/12/1984	26.2
24/6/1970	2.23	2/6/1983	30.4	21/1/1972	3.4	31/12/1984	26.4
25/6/1970	2.23	3/6/1983	30.4	28/1/1972	3.4	7/1/1985	25.55
26/6/1970	2.23	6/6/1983	30.35	4/2/1972	3.39	14/1/1985	26.1
29/6/1970	2.23	7/6/1983	30.6	11/2/1972	3.39	21/1/1985	25.9
30/6/1970	2.23	8/6/1983	30.65	18/2/1972	3.39	28/1/1985	25.2
1/7/1970	2.23	9/6/1983	30.6	25/2/1972	3.39	4/2/1985	26.5
2/7/1970	2.23	10/6/1983	30.75	3/3/1972	3.67	11/2/1985	28.05
3/7/1970	2.23	13/6/1983	31.05	10/3/1972	3.67	18/2/1985	27.8
6/7/1970	2.23	14/6/1983	31.2	17/3/1972	3.67	25/2/1985	28
7/7/1970	2.23	15/6/1983	31.3	24/3/1972	3.67	4/3/1985	27.75
8/7/1970	2.23	16/6/1983	31.55	31/3/1972	3.67	11/3/1985	27.6
9/7/1970	2.23	17/6/1983	31.6	7/4/1972	3.67	18/3/1985	28.85
10/7/1970	2.23	20/6/1983	31.55	14/4/1972	3.67	25/3/1985	28.1
13/7/1970	2.23	21/6/1983	31.5	21/4/1972	3.67	1/4/1985	28.7
14/7/1970	2.23	22/6/1983	31.5	28/4/1972	3.64	8/4/1985	29.05
15/7/1970	2.23	23/6/1983	31.3	5/5/1972	3.64	15/4/1985	29.15
16/7/1970	2.23	24/6/1983	31.1	12/5/1972	3.64	22/4/1985	29.6
17/7/1970	2.23	27/6/1983	31.15	19/5/1972	3.64	29/4/1985	27.65
20/7/1970	2.23	28/6/1983	31.2	26/5/1972	3.64	6/5/1985	27.2
21/7/1970	2.23	29/6/1983	31.25	2/6/1972	3.64	13/5/1985	27.6
22/7/1970	2.23	30/6/1983	31.35	9/6/1972	3.64	20/5/1985	27.9
23/7/1970	2.23	1/7/1983	31.35	16/6/1972	3.64	27/5/1985	27.75
24/7/1970	2.23	4/7/1983	31.35	23/6/1972	3.64	3/6/1985	27.5
27/7/1970	2.23	5/7/1983	31.3	30/6/1972	3.64	10/6/1985	26.8
28/7/1970	2.23	6/7/1983	31.3	7/7/1972	3.64	17/6/1985	27.25
29/7/1970	2.23	7/7/1983	31.4	14/7/1972	3.64	24/6/1985	27.5
30/7/1970	2.23	8/7/1983	31.5	21/7/1972	3.64	1/7/1985	26.7
31/7/1970	2.23	11/7/1983	31.6	28/7/1972	3.64	8/7/1985	27
3/8/1970	2.23	12/7/1983	31.7	4/8/1972	3.62	15/7/1985	27.25
4/8/1970	2.23	13/7/1983	31.8	11/8/1972	3.62	22/7/1985	27.7
5/8/1970	2.23	14/7/1983	31.85	18/8/1972	3.62	29/7/1985	27.35
6/8/1970	2.23	15/7/1983	31.8	25/8/1972	3.62	5/8/1985	27.3
7/8/1970	2.23	18/7/1983	31.75	1/9/1972	3.62	12/8/1985	27.55
10/8/1970	2.23	19/7/1983	31.65	8/9/1972	3.62	19/8/1985	28
11/8/1970	2.23	20/7/1983	31.65	15/9/1972	3.62	26/8/1985	28.1
12/8/1970	2.23	21/7/1983	31.6	22/9/1972	3.62	2/9/1985	28.05
13/8/1970	2.23	22/7/1983	31.6	29/9/1972	3.62	9/9/1985	27.65
14/8/1970	2.23	25/7/1983	31.45	6/10/1972	3.62	16/9/1985	27.9
17/8/1970	2.23	26/7/1983	31.5	13/10/1972	3.62	23/9/1985	28.7
18/8/1970	2.23	27/7/1983	31.75	20/10/1972	3.62	30/9/1985	29.1
19/8/1970	2.23	28/7/1983	31.85	27/10/1972	3.62	7/10/1985	29.15
20/8/1970	2.23	29/7/1983	31.95	3/11/1972	3.62	14/10/1985	29
21/8/1970	2.23	1/8/1983	32	10/11/1972	3.62	21/10/1985	29.95
24/8/1970	2.23	2/8/1983	32.25	17/11/1972	3.62	28/10/1985	30.15
25/8/1970	2.23	3/8/1983	32.15	24/11/1972	3.62	4/11/1985	30.2
26/8/1970	2.23	4/8/1983	32.25	1/12/1972	3.62	11/11/1985	30.7
27/8/1970	2.23	5/8/1983	32.1	8/12/1972	3.62	18/11/1985	30.9
28/8/1970	2.23	8/8/1983	32.1	15/12/1972	3.62	25/11/1985	31
31/8/1970	2.23	9/8/1983	32	22/12/1972	3.62	2/12/1985	29.75
1/9/1970	2.23	10/8/1983	32.15	29/12/1972	3.62	9/12/1985	27.52
2/9/1970	2.23	11/8/1983	32	5/1/1973	3.62	16/12/1985	27.27
3/9/1970	2.23	12/8/1983	31.9	12/1/1973	3.62	23/12/1985	26.4
4/9/1970	2.23	15/8/1983	32	19/1/1973	3.62	30/12/1985	26.65
7/9/1970	2.23	16/8/1983	31.95	26/1/1973	3.62	6/1/1986	26.53
8/9/1970	2.23	17/8/1983	31.9	2/2/1973	3.78	13/1/1986	25.08
9/9/1970	2.23	18/8/1983	31.85	9/2/1973	3.78	20/1/1986	21.33
10/9/1970	2.23	19/8/1983	31.75	16/2/1973	3.78	27/1/1986	20.87
11/9/1970	2.23	22/8/1983	31.65	23/2/1973	3.78	3/2/1986	17.42
14/9/1970	2.23	23/8/1983	31.65	2/3/1973	3.78	10/2/1986	16.78
15/9/1970	2.23	24/8/1983	31.7	9/3/1973	3.78	17/2/1986	16.03
16/9/1970	2.23	25/8/1983	31.7	16/3/1973	3.78	24/2/1986	14.68
17/9/1970	2.23	26/8/1983	31.8	23/3/1973	3.78	3/3/1986	11.98
18/9/1970	2.23	29/8/1983	31.7	30/3/1973	3.78	10/3/1986	12.94
21/9/1970	2.23	30/8/1983	31.7	6/4/1973	3.78	17/3/1986	13.28
22/9/1970	2.23	31/8/1983	31.65	13/4/1973	3.78	24/3/1986	12.2
23/9/1970	2.23	1/9/1983	31.65	20/4/1973	3.78	31/3/1986	10.25
24/9/1970	2.23	2/9/1983	31.65	27/4/1973	3.78	7/4/1986	14.39
25/9/1970	2.23	5/9/1983	31.65	4/5/1973	4.02	14/4/1986	12.94
28/9/1970	2.23	6/9/1983	31.4	11/5/1973	4.02	21/4/1986	12.48
29/9/1970	2.23	7/9/1983	31.4	18/5/1973	4.02	28/4/1986	13.34
30/9/1970	2.23	8/9/1983	31.3	25/5/1973	4.02	5/5/1986	14.32
1/10/1970	2.23	9/9/1983	31.3	1/6/1973	4.02	12/5/1986	15.75
2/10/1970	2.23	12/9/1983	31.2	8/6/1973	4.02	19/5/1986	17.13
5/10/1970	2.23	13/9/1983	31.15	15/6/1973	4.02	26/5/1986	16.95
6/10/1970	2.23	14/9/1983	31.25	22/6/1973	4.02	2/6/1986	13.8
7/10/1970	2.23	15/9/1983	31.4	29/6/1973	4.25	9/6/1986	12.6
8/10/1970	2.23	16/9/1983	31.4	6/7/1973	4.25	16/6/1986	13.64
9/10/1970	2.23	19/9/1983	31.45	13/7/1973	4.25	23/6/1986	14.05
12/10/1970	2.23	20/9/1983	31.4	20/7/1973	4.25	30/6/1986	12.8
13/10/1970	2.23	21/9/1983	31.4	27/7/1973	4.25	7/7/1986	11.17
14/10/1970	2.23	22/9/1983	31.35	3/8/1973	4.42	14/7/1986	11.22
15/10/1970	2.23	23/9/1983	31.35	10/8/1973	4.42	21/7/1986	13.06
16/10/1970	2.23	26/9/1983	31.3	17/8/1973	4.42	28/7/1986	11.08
19/10/1970	2.23	27/9/1983	31.15	24/8/1973	4.42	4/8/1986	14
20/10/1970	2.23	28/9/1983	30.9	31/8/1973	4.58	11/8/1986	14.91
21/10/1970	2.23	29/9/1983	30.65	7/9/1973	4.58	18/8/1986	15.57
22/10/1970	2.23	30/9/1983	30.45	14/9/1973	4.58	25/8/1986	15.48
23/10/1970	2.23	3/10/1983	30	21/9/1973	4.58	1/9/1986	15.92
26/10/1970	2.23	4/10/1983	30.15	28/9/1973	4.58	8/9/1986	15.63
27/10/1970	2.23	5/10/1983	30.55	5/10/1973	4.58	15/9/1986	14.31
28/10/1970	2.23	6/10/1983	30.25	12/10/1973	4.58	22/9/1986	13.93
29/10/1970	2.23	7/10/1983	30.55	19/10/1973	4.58	29/9/1986	14.92
30/10/1970	2.23	10/10/1983	30.85	26/10/1973	4.58	6/10/1986	14.82
2/11/1970	2.23	11/10/1983	30.7	2/11/1973	4.6	13/10/1986	14.97
3/11/1970	2.23	12/10/1983	30.45	9/11/1973	4.6	20/10/1986	15.16
4/11/1970	2.23	13/10/1983	30.75	16/11/1973	4.6	27/10/1986	14.4
5/11/1970	2.23	14/10/1983	30.6	23/11/1973	4.6	3/11/1986	14.7
6/11/1970	2.23	17/10/1983	30.5	30/11/1973	4.6	10/11/1986	15.3
9/11/1970	2.23	18/10/1983	30.6	7/12/1973	4.6	17/11/1986	15.61
10/11/1970	2.23	19/10/1983	30.55	14/12/1973	4.6	24/11/1986	14.97
11/11/1970	2.23	20/10/1983	30.5	21/12/1973	4.6	1/12/1986	15.29
12/11/1970	2.23	21/10/1983	30.55	28/12/1973	4.6	8/12/1986	15
13/11/1970	2.23	24/10/1983	30.45	4/1/1974	4.6	15/12/1986	16.38
16/11/1970	2.23	25/10/1983	30.45	11/1/1974	4.6	22/12/1986	16.94
17/11/1970	2.23	26/10/1983	30.25	18/1/1974	4.6	29/12/1986	17.65
18/11/1970	2.23	27/10/1983	30.25	25/1/1974	4.6	5/1/1987	17.97
19/11/1970	2.23	28/10/1983	30.25	1/2/1974	15.5	12/1/1987	18.99
20/11/1970	2.23	31/10/1983	30.25	8/2/1974	15.5	19/1/1987	18.7
23/11/1970	2.23	1/11/1983	30.35	15/2/1974	15.5	26/1/1987	18.63
24/11/1970	2.23	2/11/1983	30.45	22/2/1974	15.5	2/2/1987	18.59
25/11/1970	2.23	3/11/1983	30.45	1/3/1974	15.5	9/2/1987	18.36
26/11/1970	2.23	4/11/1983	30.35	8/3/1974	15.5	16/2/1987	17.82
27/11/1970	2.23	7/11/1983	30.4	15/3/1974	15.5	23/2/1987	17.15
30/11/1970	2.23	8/11/1983	30.35	22/3/1974	15.5	2/3/1987	16.43
1/12/1970	2.23	9/11/1983	30.4	29/3/1974	15.5	9/3/1987	18.13
2/12/1970	2.23	10/11/1983	30.25	5/4/1974	15.5	16/3/1987	18.6
3/12/1970	2.23	11/11/1983	30.15	12/4/1974	15.5	23/3/1987	18.59
4/12/1970	2.23	14/11/1983	30.1	19/4/1974	15.5	30/3/1987	18.66
7/12/1970	2.23	15/11/1983	30.15	26/4/1974	15.5	6/4/1987	18.7
8/12/1970	2.23	16/11/1983	30.15	3/5/1974	13	13/4/1987	18.07
9/12/1970	2.23	17/11/1983	29.3	10/5/1974	13	20/4/1987	18.66
10/12/1970	2.23	18/11/1983	29.32	17/5/1974	13	27/4/1987	18.82
11/12/1970	2.23	21/11/1983	29.5	24/5/1974	13	4/5/1987	18.92
14/12/1970	2.23	22/11/1983	29.5	31/5/1974	13	11/5/1987	19.42
15/12/1970	2.23	23/11/1983	29.5	7/6/1974	13	18/5/1987	19.9
16/12/1970	2.23	24/11/1983	29.5	14/6/1974	13	25/5/1987	19.67
17/12/1970	2.23	25/11/1983	29.5	21/6/1974	13	1/6/1987	19.54
18/12/1970	2.23	28/11/1983	29.87	28/6/1974	13	8/6/1987	19.93
21/12/1970	2.23	29/11/1983	29.7	5/7/1974	13	15/6/1987	20.06
22/12/1970	2.23	30/11/1983	29.62	12/7/1974	13	22/6/1987	20.49
23/12/1970	2.23	1/12/1983	29.35	19/7/1974	13	29/6/1987	20.38
24/12/1970	2.23	2/12/1983	29.57	26/7/1974	13	6/7/1987	20.91
25/12/1970	2.23	5/12/1983	29.4	2/8/1974	11.5	13/7/1987	21.38
28/12/1970	2.23	6/12/1983	29.4	9/8/1974	11.5	20/7/1987	22.22
29/12/1970	2.23	7/12/1983	29.37	16/8/1974	11.5	27/7/1987	20.5
30/12/1970	2.23	8/12/1983	29.3	23/8/1974	11.5	3/8/1987	22.21
31/12/1970	2.23	9/12/1983	29.4	30/8/1974	11.5	10/8/1987	20.69
1/1/1971	2.23	12/12/1983	29.4	6/9/1974	11.5	17/8/1987	19.85
4/1/1971	2.23	13/12/1983	29.4	13/9/1974	11.5	24/8/1987	19.17
5/1/1971	2.23	14/12/1983	29.4	20/9/1974	11.5	31/8/1987	19.75
6/1/1971	2.23	15/12/1983	29.22	27/9/1974	11.5	7/9/1987	19.33
7/1/1971	2.23	16/12/1983	28.55	4/10/1974	11.5	14/9/1987	19.63
8/1/1971	2.23	19/12/1983	28.62	11/10/1974	11.5	21/9/1987	19.76
11/1/1971	2.23	20/12/1983	28.67	18/10/1974	11.5	28/9/1987	19.47
12/1/1971	2.23	21/12/1983	28.6	25/10/1974	11.5	5/10/1987	19.8
13/1/1971	2.23	22/12/1983	29.07	1/11/1974	11.7	12/10/1987	19.66
14/1/1971	2.23	23/12/1983	29.07	8/11/1974	11.7	19/10/1987	19.79
15/1/1971	2.23	26/12/1983	29.07	15/11/1974	11.7	26/10/1987	19.99
18/1/1971	2.23	27/12/1983	30.12	22/11/1974	11.7	2/11/1987	19.63
19/1/1971	2.23	28/12/1983	30	29/11/1974	11.7	9/11/1987	18.65
20/1/1971	2.23	29/12/1983	29.8	6/12/1974	11.7	16/11/1987	18.68
21/1/1971	2.23	30/12/1983	29.65	13/12/1974	11.7	23/11/1987	19.3
22/1/1971	2.23	2/1/1984	29.65	20/12/1974	11.7	30/11/1987	18.52
25/1/1971	2.23	3/1/1984	29.4	27/12/1974	11.7	7/12/1987	18.29
26/1/1971	2.23	4/1/1984	29.55	3/1/1975	11.7	14/12/1987	17.47
27/1/1971	2.23	5/1/1984	29.55	10/1/1975	11.7	21/12/1987	15.12
28/1/1971	2.23	6/1/1984	29.2	17/1/1975	11.7	28/12/1987	16.46
29/1/1971	2.55	9/1/1984	29.3	24/1/1975	11.7	4/1/1988	17.76
1/2/1971	2.55	10/1/1984	29.3	31/1/1975	11.5	11/1/1988	16.63
2/2/1971	2.55	11/1/1984	29.5	7/2/1975	11.5	18/1/1988	17.27
3/2/1971	2.55	12/1/1984	29.55	14/2/1975	11.5	25/1/1988	17.1
4/2/1971	2.55	13/1/1984	29.55	21/2/1975	11.5	1/2/1988	16.82
5/2/1971	2.55	16/1/1984	29.75	28/2/1975	11.5	8/2/1988	17.7
8/2/1971	2.55	17/1/1984	29.9	7/3/1975	11.5	15/2/1988	16.84
9/2/1971	2.55	18/1/1984	29.7	14/3/1975	11.5	22/2/1988	16.63
10/2/1971	2.55	19/1/1984	29.75	21/3/1975	11.5	29/2/1988	15.97
11/2/1971	2.55	20/1/1984	29.9	28/3/1975	11.5	7/3/1988	15.34
12/2/1971	2.55	23/1/1984	29.75	4/4/1975	11.5	14/3/1988	15.56
15/2/1971	2.55	24/1/1984	29.75	11/4/1975	11.5	21/3/1988	16.51
16/2/1971	2.55	25/1/1984	29.7	18/4/1975	11.5	28/3/1988	17.05
17/2/1971	2.55	26/1/1984	29.95	25/4/1975	11.5	4/4/1988	16.99
18/2/1971	2.55	27/1/1984	30.15	2/5/1975	11.4	11/4/1988	17.86
19/2/1971	2.55	30/1/1984	29.97	9/5/1975	11.4	18/4/1988	18.49
22/2/1971	2.55	31/1/1984	30.27	16/5/1975	11.4	25/4/1988	18.36
23/2/1971	2.55	1/2/1984	30.25	23/5/1975	11.4	2/5/1988	17.11
24/2/1971	2.55	2/2/1984	30.2	30/5/1975	11.4	9/5/1988	17.55
25/2/1971	2.55	3/2/1984	30.2	6/6/1975	11.4	16/5/1988	17.69
26/2/1971	2.55	6/2/1984	30.2	13/6/1975	11.4	23/5/1988	17.01
1/3/1971	2.55	7/2/1984	30.2	20/6/1975	11.4	30/5/1988	17.44
2/3/1971	2.55	8/2/1984	29.95	27/6/1975	11.4	6/6/1988	17.28
3/3/1971	2.55	9/2/1984	29.95	4/7/1975	11.4	13/6/1988	16.43
4/3/1971	2.55	10/2/1984	29.75	11/7/1975	11.4	20/6/1988	16.01
5/3/1971	2.55	13/2/1984	29.6	18/7/1975	11.4	27/6/1988	15.86
8/3/1971	2.55	14/2/1984	29.6	25/7/1975	11.4	4/7/1988	14.91
9/3/1971	2.55	15/2/1984	29.65	1/8/1975	11.5	11/7/1988	14.55
10/3/1971	2.55	16/2/1984	29.85	8/8/1975	11.5	18/7/1988	15.83
11/3/1971	2.55	17/2/1984	30.12	15/8/1975	11.5	25/7/1988	16.08
12/3/1971	2.55	20/2/1984	30.12	22/8/1975	11.5	1/8/1988	16.06
15/3/1971	2.55	21/2/1984	30.2	29/8/1975	11.5	8/8/1988	15.83
16/3/1971	2.55	22/2/1984	30.25	5/9/1975	11.5	15/8/1988	15.58
17/3/1971	2.55	23/2/1984	30.4	12/9/1975	11.5	22/8/1988	15.74
18/3/1971	2.55	24/2/1984	30.3	19/9/1975	11.5	29/8/1988	15.24
19/3/1971	2.55	27/2/1984	30.2	26/9/1975	11.5	5/9/1988	14.79
22/3/1971	2.55	28/2/1984	30.62	3/10/1975	11.5	12/9/1988	14.48
23/3/1971	2.55	29/2/1984	30.62	10/10/1975	11.5	19/9/1988	14.71
24/3/1971	2.55	1/3/1984	30.72	17/10/1975	11.5	26/9/1988	14.16
25/3/1971	2.55	2/3/1984	30.65	24/10/1975	11.5	3/10/1988	13.03
26/3/1971	2.55	5/3/1984	30.75	31/10/1975	11.6	10/10/1988	13.58
29/3/1971	2.55	6/3/1984	30.75	7/11/1975	11.6	17/10/1988	15.16
30/3/1971	2.55	7/3/1984	30.72	14/11/1975	11.6	24/10/1988	12.93
31/3/1971	2.55	8/3/1984	30.72	21/11/1975	11.6	31/10/1988	13.54
1/4/1971	2.55	9/3/1984	30.92	28/11/1975	11.6	7/11/1988	14.08
2/4/1971	2.55	12/3/1984	30.87	5/12/1975	11.6	14/11/1988	14.24
5/4/1971	2.55	13/3/1984	30.87	12/12/1975	11.6	21/11/1988	13.72
6/4/1971	2.55	14/3/1984	30.77	19/12/1975	11.6	28/11/1988	14.93
7/4/1971	2.55	15/3/1984	30.72	26/12/1975	11.6	5/12/1988	15.35
8/4/1971	2.55	16/3/1984	30.62	2/1/1976	11.6	12/12/1988	16.08
9/4/1971	2.55	19/3/1984	30.6	9/1/1976	11.6	19/12/1988	16.23
12/4/1971	2.55	20/3/1984	30.7	16/1/1976	11.6	26/12/1988	16.63
13/4/1971	2.55	21/3/1984	30.75	23/1/1976	11.6	2/1/1989	17.11
14/4/1971	2.55	22/3/1984	30.7	30/1/1976	12.9	9/1/1989	17.74
15/4/1971	2.55	23/3/1984	30.65	6/2/1976	12.9	16/1/1989	18.88
16/4/1971	2.55	26/3/1984	30.65	13/2/1976	12.9	23/1/1989	17.66
19/4/1971	2.55	27/3/1984	30.65	20/2/1976	12.9	30/1/1989	17.31
20/4/1971	2.55	28/3/1984	30.8	27/2/1976	12.9	6/2/1989	17.38
21/4/1971	2.55	29/3/1984	30.8	5/3/1976	12.9	13/2/1989	17.6
22/4/1971	2.55	30/3/1984	30.8	12/3/1976	12.9	20/2/1989	18.6
23/4/1971	2.55	2/4/1984	30.75	19/3/1976	12.9	27/2/1989	18.16
26/4/1971	2.55	3/4/1984	30.8	26/3/1976	12.9	6/3/1989	18.72
27/4/1971	2.55	4/4/1984	30.8	2/4/1976	12.9	13/3/1989	19.05
28/4/1971	2.55	5/4/1984	30.8	9/4/1976	12.9	20/3/1989	19.52
29/4/1971	2.55	6/4/1984	30.75	16/4/1976	12.9	27/3/1989	20.55
30/4/1971	3.45	9/4/1984	30.75	23/4/1976	12.9	3/4/1989	20.02
3/5/1971	3.45	10/4/1984	30.75	30/4/1976	12.95	10/4/1989	20.65
4/5/1971	3.45	11/4/1984	30.8	7/5/1976	12.95	17/4/1989	21.22
5/5/1971	3.45	12/4/1984	30.75	14/5/1976	12.95	24/4/1989	20.63
6/5/1971	3.45	13/4/1984	30.65	21/5/1976	12.95	1/5/1989	20.66
7/5/1971	3.45	16/4/1984	30.65	28/5/1976	12.95	8/5/1989	19.4
10/5/1971	3.45	17/4/1984	30.6	4/6/1976	12.95	15/5/1989	20.52
11/5/1971	3.45	18/4/1984	30.55	11/6/1976	12.95	22/5/1989	20.91
12/5/1971	3.45	19/4/1984	30.5	18/6/1976	12.95	29/5/1989	19.54
13/5/1971	3.45	20/4/1984	30.5	25/6/1976	12.95	5/6/1989	20.5
14/5/1971	3.45	23/4/1984	30.5	2/7/1976	12.95	12/6/1989	19.29
17/5/1971	3.45	24/4/1984	30.45	9/7/1976	12.95	19/6/1989	20.88
18/5/1971	3.45	25/4/1984	30.4	16/7/1976	12.95	26/6/1989	20.27
19/5/1971	3.45	26/4/1984	30.45	23/7/1976	12.95	3/7/1989	20.55
20/5/1971	3.45	27/4/1984	30.4	30/7/1976	13.15	10/7/1989	20.38
21/5/1971	3.45	30/4/1984	30.25	6/8/1976	13.15	17/7/1989	20.48
24/5/1971	3.45	1/5/1984	30.25	13/8/1976	13.15	24/7/1989	18.76
25/5/1971	3.45	2/5/1984	30.17	20/8/1976	13.15	31/7/1989	18.33
26/5/1971	3.45	3/5/1984	30.15	27/8/1976	13.15	7/8/1989	17.91
27/5/1971	3.45	4/5/1984	30.15	3/9/1976	13.15	14/8/1989	18.59
28/5/1971	3.45	7/5/1984	30.25	10/9/1976	13.15	21/8/1989	19.1
31/5/1971	3.45	8/5/1984	30.2	17/9/1976	13.15	28/8/1989	18.68
1/6/1971	3.45	9/5/1984	30.3	24/9/1976	13.15	4/9/1989	18.88
2/6/1971	3.45	10/5/1984	30.35	1/10/1976	13.15	11/9/1989	19.76
3/6/1971	3.45	11/5/1984	30.35	8/10/1976	13.15	18/9/1989	19.87
4/6/1971	3.45	14/5/1984	30.55	15/10/1976	13.15	25/9/1989	19.49
7/6/1971	3.45	15/5/1984	30.65	22/10/1976	13.15	2/10/1989	19.99
8/6/1971	3.45	16/5/1984	31	29/10/1976	13.56	9/10/1989	20.03
9/6/1971	3.45	17/5/1984	30.75	5/11/1976	13.56	16/10/1989	20.63
10/6/1971	3.45	18/5/1984	30.75	12/11/1976	13.56	23/10/1989	19.67
11/6/1971	3.45	21/5/1984	30.75	19/11/1976	13.56	30/10/1989	19.73
14/6/1971	3.45	22/5/1984	30.45	26/11/1976	13.56	6/11/1989	20.06
15/6/1971	3.45	23/5/1984	30.5	3/12/1976	13.56	13/11/1989	19.61
16/6/1971	3.45	24/5/1984	30.5	10/12/1976	13.56	20/11/1989	20.13
17/6/1971	3.45	25/5/1984	30.6	17/12/1976	13.56	27/11/1989	19.64
18/6/1971	3.45	28/5/1984	30.6	24/12/1976	13.56	4/12/1989	20.23
21/6/1971	3.45	29/5/1984	30.85	31/12/1976	13.56	11/12/1989	20.68
22/6/1971	3.45	30/5/1984	30.75	7/1/1977	13.56	18/12/1989	22.2
23/6/1971	3.45	31/5/1984	30.85	14/1/1977	13.56	25/12/1989	21.3
24/6/1971	3.45	1/6/1984	30.75	21/1/1977	13.56	1/1/1990	21.83
25/6/1971	3.45	4/6/1984	30.7	28/1/1977	13.56	8/1/1990	21.63
28/6/1971	3.45	5/6/1984	30.75	4/2/1977	14.45	15/1/1990	22.35
29/6/1971	3.45	6/6/1984	30.55	11/2/1977	14.45	22/1/1990	22.56
30/6/1971	3.45	7/6/1984	30.45	18/2/1977	14.45	29/1/1990	22.79
1/7/1971	3.45	8/6/1984	30.4	25/2/1977	14.45	5/2/1990	22.43
2/7/1971	3.45	11/6/1984	30.2	4/3/1977	14.45	12/2/1990	22.02
5/7/1971	3.45	12/6/1984	30.2	11/3/1977	14.45	19/2/1990	22.45
6/7/1971	3.45	13/6/1984	30.1	18/3/1977	14.45	26/2/1990	21.81
7/7/1971	3.45	14/6/1984	30.15	25/3/1977	14.45	5/3/1990	21.61
8/7/1971	3.45	15/6/1984	30.05	1/4/1977	14.45	12/3/1990	20.25
9/7/1971	3.45	18/6/1984	29.8	8/4/1977	14.45	19/3/1990	19.59
12/7/1971	3.45	19/6/1984	29.7	15/4/1977	14.45	26/3/1990	20.47
13/7/1971	3.45	20/6/1984	29.6	22/4/1977	14.45	2/4/1990	20.51
14/7/1971	3.45	21/6/1984	29.25	29/4/1977	14.45	9/4/1990	18.31
15/7/1971	3.45	22/6/1984	29.15	6/5/1977	14.45	16/4/1990	17.86
16/7/1971	3.45	25/6/1984	29.55	13/5/1977	14.45	23/4/1990	18.6
19/7/1971	3.45	26/6/1984	29.35	20/5/1977	14.45	30/4/1990	18.5
20/7/1971	3.45	27/6/1984	29.3	27/5/1977	14.45	7/5/1990	18.29
21/7/1971	3.45	28/6/1984	29.55	3/6/1977	14.45	14/5/1990	19.73
22/7/1971	3.45	29/6/1984	29.75	10/6/1977	14.45	21/5/1990	18.26
23/7/1971	3.45	2/7/1984	29.6	17/6/1977	14.45	28/5/1990	16.11
26/7/1971	3.45	3/7/1984	29.45	24/6/1977	14.45	4/6/1990	17.09
27/7/1971	3.45	4/7/1984	29.45	1/7/1977	14.45	11/6/1990	16.82
28/7/1971	3.45	5/7/1984	29.6	8/7/1977	14.45	18/6/1990	15.92
29/7/1971	3.45	6/7/1984	29.65	15/7/1977	14.45	25/6/1990	16.15
30/7/1971	3.42	9/7/1984	29.5	22/7/1977	14.45	2/7/1990	16.93
2/8/1971	3.42	10/7/1984	29.4	29/7/1977	14.28	9/7/1990	16.63
3/8/1971	3.42	11/7/1984	29.35	5/8/1977	14.28	16/7/1990	18.67
4/8/1971	3.42	12/7/1984	29.1	12/8/1977	14.28	23/7/1990	19.88
5/8/1971	3.42	13/7/1984	29	19/8/1977	14.28	30/7/1990	20.24
6/8/1971	3.42	16/7/1984	28.9	26/8/1977	14.28	6/8/1990	28.72
9/8/1971	3.42	17/7/1984	29	2/9/1977	14.28	13/8/1990	27.07
10/8/1971	3.42	18/7/1984	28.75	9/9/1977	14.28	20/8/1990	28.63
11/8/1971	3.42	19/7/1984	28.65	16/9/1977	14.28	27/8/1990	27.36
12/8/1971	3.42	20/7/1984	28.45	23/9/1977	14.28	3/9/1990	27.44
13/8/1971	3.42	23/7/1984	28.3	30/9/1977	14.28	10/9/1990	30.82
16/8/1971	3.42	24/7/1984	28.2	7/10/1977	14.28	17/9/1990	33.72
17/8/1971	3.42	25/7/1984	28.05	14/10/1977	14.28	24/9/1990	39.05
18/8/1971	3.42	26/7/1984	27.85	21/10/1977	14.28	1/10/1990	37.07
19/8/1971	3.42	27/7/1984	27.7	28/10/1977	14.28	8/10/1990	38.88
20/8/1971	3.42	30/7/1984	27.65	4/11/1977	14.05	15/10/1990	38
23/8/1971	3.42	31/7/1984	27.65	11/11/1977	14.05	22/10/1990	28.45
24/8/1971	3.42	1/8/1984	28.05	18/11/1977	14.05	29/10/1990	35.28
25/8/1971	3.42	2/8/1984	29.1	25/11/1977	14.05	5/11/1990	32.05
26/8/1971	3.42	3/8/1984	28.85	2/12/1977	14.05	12/11/1990	32.07
27/8/1971	3.42	6/8/1984	28.95	9/12/1977	14.05	19/11/1990	31.45
30/8/1971	3.42	7/8/1984	29.3	16/12/1977	14.05	26/11/1990	33.27
31/8/1971	3.42	8/8/1984	29.35	23/12/1977	14.05	3/12/1990	29.4
1/9/1971	3.42	9/8/1984	29.35	30/12/1977	14.05	10/12/1990	27.07
2/9/1971	3.42	10/8/1984	29.15	6/1/1978	14.05	17/12/1990	27.1
3/9/1971	3.42	13/8/1984	29.05	13/1/1978	14.05	24/12/1990	26.95
6/9/1971	3.42	14/8/1984	29.25	20/1/1978	14.05	31/12/1990	28.47
7/9/1971	3.42	15/8/1984	29.2	27/1/1978	14.05	7/1/1991	27.25
8/9/1971	3.42	16/8/1984	29.05	3/2/1978	14.05	14/1/1991	30.13
9/9/1971	3.42	17/8/1984	29.1	10/2/1978	14.05	21/1/1991	21.63
10/9/1971	3.42	20/8/1984	29.1	17/2/1978	14.05	28/1/1991	21.02
13/9/1971	3.42	21/8/1984	29.3	24/2/1978	14.05	4/2/1991	21.22
14/9/1971	3.42	22/8/1984	29.6	3/3/1978	14	11/2/1991	22.43
15/9/1971	3.42	23/8/1984	29.5	10/3/1978	14	18/2/1991	20.73
16/9/1971	3.42	24/8/1984	29.5	17/3/1978	14	25/2/1991	17.42
17/9/1971	3.42	27/8/1984	29.85	24/3/1978	14	4/3/1991	20.32
20/9/1971	3.42	28/8/1984	29.75	31/3/1978	13.95	11/3/1991	18.99
21/9/1971	3.42	29/8/1984	29.8	7/4/1978	13.95	18/3/1991	19.77
22/9/1971	3.42	30/8/1984	29.3	14/4/1978	13.95	25/3/1991	19.47
23/9/1971	3.42	31/8/1984	29.3	21/4/1978	13.95	1/4/1991	19.27
24/9/1971	3.42	3/9/1984	29.3	28/4/1978	13.83	8/4/1991	20.27
27/9/1971	3.42	4/9/1984	29.1	5/5/1978	13.83	15/4/1991	21.85
28/9/1971	3.42	5/9/1984	28.9	12/5/1978	13.83	22/4/1991	21.67
29/9/1971	3.42	6/9/1984	29.25	19/5/1978	13.83	29/4/1991	21.3
30/9/1971	3.42	7/9/1984	29.25	26/5/1978	13.83	6/5/1991	21.72
1/10/1971	3.42	10/9/1984	29.25	2/6/1978	13.9	13/5/1991	20.88
4/10/1971	3.42	11/9/1984	29.5	9/6/1978	13.9	20/5/1991	21.38
5/10/1971	3.42	12/9/1984	29.4	16/6/1978	13.9	27/5/1991	21.03
6/10/1971	3.42	13/9/1984	29.35	23/6/1978	13.9	3/6/1991	21.15
7/10/1971	3.42	14/9/1984	29.3	30/6/1978	13.95	10/6/1991	19.83
8/10/1971	3.42	17/9/1984	29.2	7/7/1978	13.95	17/6/1991	19.97
11/10/1971	3.42	18/9/1984	29.25	14/7/1978	13.95	24/6/1991	19.91
12/10/1971	3.42	19/9/1984	29.35	21/7/1978	13.95	1/7/1991	20.78
13/10/1971	3.42	20/9/1984	29.3	28/7/1978	13.95	8/7/1991	21.28
14/10/1971	3.42	21/9/1984	29.25	4/8/1978	13.89	15/7/1991	21.49
15/10/1971	3.42	24/9/1984	29.25	11/8/1978	13.89	22/7/1991	21.73
18/10/1971	3.42	25/9/1984	29.15	18/8/1978	13.89	29/7/1991	21.38
19/10/1971	3.42	26/9/1984	29.6	25/8/1978	13.89	5/8/1991	21.49
20/10/1971	3.42	27/9/1984	29.6	1/9/1978	13.96	12/8/1991	21.71
21/10/1971	3.42	28/9/1984	29.65	8/9/1978	13.96	19/8/1991	22.49
22/10/1971	3.42	1/10/1984	29.65	15/9/1978	13.96	26/8/1991	21.97
25/10/1971	3.42	2/10/1984	29.6	22/9/1978	13.96	2/9/1991	22.28
26/10/1971	3.42	3/10/1984	29.5	29/9/1978	14.09	9/9/1991	21.35
27/10/1971	3.42	4/10/1984	29.45	6/10/1978	14.09	16/9/1991	21.83
28/10/1971	3.42	5/10/1984	29.4	13/10/1978	14.09	23/9/1991	22.19
29/10/1971	3.4	8/10/1984	29.35	20/10/1978	14.09	30/9/1991	22.24
1/11/1971	3.4	9/10/1984	29.4	27/10/1978	14.09	7/10/1991	22.98
2/11/1971	3.4	10/10/1984	29.35	3/11/1978	14.35	14/10/1991	23.47
3/11/1971	3.4	11/10/1984	29.3	10/11/1978	14.35	21/10/1991	24.03
4/11/1971	3.4	12/10/1984	29.1	17/11/1978	14.35	28/10/1991	23.23
5/11/1971	3.4	15/10/1984	28.75	24/11/1978	14.35	4/11/1991	23.81
8/11/1971	3.4	16/10/1984	28.65	1/12/1978	14.9	11/11/1991	22.65
9/11/1971	3.4	17/10/1984	27.9	8/12/1978	14.9	18/11/1991	22.38
10/11/1971	3.4	18/10/1984	27.55	15/12/1978	14.9	25/11/1991	22.15
11/11/1971	3.4	19/10/1984	27.7	22/12/1978	14.9	2/12/1991	21.09
12/11/1971	3.4	22/10/1984	28.35	29/12/1978	16.25	9/12/1991	19.39
15/11/1971	3.4	23/10/1984	28.1	5/1/1979	16.25	16/12/1991	19.77
16/11/1971	3.4	24/10/1984	28.4	12/1/1979	16.25	23/12/1991	18.57
17/11/1971	3.4	25/10/1984	28.5	19/1/1979	16.25	30/12/1991	18.63
18/11/1971	3.4	26/10/1984	28.6	26/1/1979	16.25	6/1/1992	19.23
19/11/1971	3.4	29/10/1984	28.4	2/2/1979	18.95	13/1/1992	18.77
22/11/1971	3.4	30/10/1984	28.1	9/2/1979	18.95	20/1/1992	18.91
23/11/1971	3.4	31/10/1984	28.5	16/2/1979	18.95	27/1/1992	19.34
24/11/1971	3.4	1/11/1984	28.7	23/2/1979	18.95	3/2/1992	18.96
25/11/1971	3.4	2/11/1984	28.6	2/3/1979	22	10/2/1992	19.69
26/11/1971	3.4	5/11/1984	28.5	9/3/1979	22	17/2/1992	19.41
29/11/1971	3.4	6/11/1984	28.7	16/3/1979	22	24/2/1992	18.36
30/11/1971	3.4	7/11/1984	28.7	23/3/1979	22	2/3/1992	18.35
1/12/1971	3.4	8/11/1984	28.65	30/3/1979	23.25	9/3/1992	18.64
2/12/1971	3.4	9/11/1984	28.55	6/4/1979	23.25	16/3/1992	19.15
3/12/1971	3.4	12/11/1984	28.45	13/4/1979	23.25	23/3/1992	18.9
6/12/1971	3.4	13/11/1984	28.45	20/4/1979	23.25	30/3/1992	19.25
7/12/1971	3.4	14/11/1984	28.45	27/4/1979	23.25	6/4/1992	20.43
8/12/1971	3.4	15/11/1984	28.4	4/5/1979	23.65	13/4/1992	20.24
9/12/1971	3.4	16/11/1984	28.05	11/5/1979	23.65	20/4/1992	20.25
10/12/1971	3.4	19/11/1984	27.85	18/5/1979	23.65	27/4/1992	20.3
13/12/1971	3.4	20/11/1984	27.75	25/5/1979	23.65	4/5/1992	21.13
14/12/1971	3.4	21/11/1984	27.6	1/6/1979	32.75	11/5/1992	21.01
15/12/1971	3.4	22/11/1984	27.6	8/6/1979	32.75	18/5/1992	20.53
16/12/1971	3.4	23/11/1984	27.6	15/6/1979	32.75	25/5/1992	20.78
17/12/1971	3.4	26/11/1984	27.15	22/6/1979	32.75	1/6/1992	22.07
20/12/1971	3.4	27/11/1984	27.3	29/6/1979	36.5	8/6/1992	22.42
21/12/1971	3.4	28/11/1984	27.3	6/7/1979	36.5	15/6/1992	22.38
22/12/1971	3.4	29/11/1984	27.5	13/7/1979	36.5	22/6/1992	22.46
23/12/1971	3.4	30/11/1984	27.3	20/7/1979	36.5	29/6/1992	22.27
24/12/1971	3.4	3/12/1984	27.3	27/7/1979	36.5	6/7/1992	21.86
27/12/1971	3.4	4/12/1984	27.5	3/8/1979	35	13/7/1992	21.38
28/12/1971	3.4	5/12/1984	27.65	10/8/1979	35	20/7/1992	21.78
29/12/1971	3.4	6/12/1984	27.7	17/8/1979	35	27/7/1992	22.08
30/12/1971	3.4	7/12/1984	27.5	24/8/1979	35	3/8/1992	21.59
31/12/1971	3.4	10/12/1984	27.45	31/8/1979	35.75	10/8/1992	21.11
3/1/1972	3.4	11/12/1984	27.25	7/9/1979	35.75	17/8/1992	21.46
4/1/1972	3.4	12/12/1984	26.7	14/9/1979	35.75	24/8/1992	21.85
5/1/1972	3.4	13/12/1984	26.7	21/9/1979	35.75	31/8/1992	21.45
6/1/1972	3.4	14/12/1984	26.4	28/9/1979	36.5	7/9/1992	21.76
7/1/1972	3.4	17/12/1984	26.6	5/10/1979	36.5	14/9/1992	22.34
10/1/1972	3.4	18/12/1984	26.5	12/10/1979	36.5	21/9/1992	21.9
11/1/1972	3.4	19/12/1984	26.05	19/10/1979	36.5	28/9/1992	21.77
12/1/1972	3.4	20/12/1984	26.2	26/10/1979	36.5	5/10/1992	21.75
13/1/1972	3.4	21/12/1984	26.2	2/11/1979	38.5	12/10/1992	22.27
14/1/1972	3.4	24/12/1984	26.2	9/11/1979	38.5	19/10/1992	22.18
17/1/1972	3.4	25/12/1984	26.2	16/11/1979	38.5	26/10/1992	21.13
18/1/1972	3.4	26/12/1984	26.8	23/11/1979	38.5	2/11/1992	20.77
19/1/1972	3.4	27/12/1984	26.35	30/11/1979	42	9/11/1992	20.63
20/1/1972	3.4	28/12/1984	26.35	7/12/1979	42	16/11/1992	20.36
21/1/1972	3.4	31/12/1984	26.4	14/12/1979	42	23/11/1992	20
24/1/1972	3.4	1/1/1985	26.4	21/12/1979	42	30/11/1992	19.9
25/1/1972	3.4	2/1/1985	26	28/12/1979	42	7/12/1992	19.16
26/1/1972	3.4	3/1/1985	25.8	4/1/1980	40.5	14/12/1992	19.05
27/1/1972	3.4	4/1/1985	25.2	11/1/1980	40.5	21/12/1992	19.92
28/1/1972	3.4	7/1/1985	25.55	18/1/1980	40.5	28/12/1992	19.77
31/1/1972	3.39	8/1/1985	25.5	25/1/1980	40.5	4/1/1993	19.02
1/2/1972	3.39	9/1/1985	25.45	1/2/1980	40	11/1/1993	18.77
2/2/1972	3.39	10/1/1985	25.75	8/2/1980	40	18/1/1993	18.93
3/2/1972	3.39	11/1/1985	25.75	15/2/1980	40	25/1/1993	19.51
4/2/1972	3.39	14/1/1985	26.1	22/2/1980	40	1/2/1993	20.31
7/2/1972	3.39	15/1/1985	25.9	29/2/1980	38.5	8/2/1993	20.07
8/2/1972	3.39	16/1/1985	25.6	7/3/1980	38.5	15/2/1993	19.95
9/2/1972	3.39	17/1/1985	25.7	14/3/1980	38.5	22/2/1993	20.07
10/2/1972	3.39	18/1/1985	25.7	21/3/1980	38.5	1/3/1993	20.61
11/2/1972	3.39	21/1/1985	25.9	28/3/1980	38.5	8/3/1993	20.63
14/2/1972	3.39	22/1/1985	25.5	4/4/1980	38.25	15/3/1993	20.17
15/2/1972	3.39	23/1/1985	25.3	11/4/1980	38.25	22/3/1993	19.52
16/2/1972	3.39	24/1/1985	25.25	18/4/1980	38.25	29/3/1993	20.26
17/2/1972	3.39	25/1/1985	25.55	25/4/1980	38.25	5/4/1993	20.58
18/2/1972	3.39	28/1/1985	25.2	2/5/1980	38.15	12/4/1993	20.42
21/2/1972	3.39	29/1/1985	25.4	9/5/1980	38.15	19/4/1993	19.99
22/2/1972	3.39	30/1/1985	25.65	16/5/1980	38.15	26/4/1993	19.82
23/2/1972	3.39	31/1/1985	26.35	23/5/1980	38.15	3/5/1993	20.58
24/2/1972	3.39	1/2/1985	26.75	30/5/1980	38.5	10/5/1993	20.42
25/2/1972	3.39	4/2/1985	26.5	6/6/1980	38.5	17/5/1993	19.51
28/2/1972	3.39	5/2/1985	26.75	13/6/1980	38.5	24/5/1993	19.43
29/2/1972	3.67	6/2/1985	27.1	20/6/1980	38.5	31/5/1993	20.04
1/3/1972	3.67	7/2/1985	27.25	27/6/1980	38.5	7/6/1993	19.6
2/3/1972	3.67	8/2/1985	27.6	4/7/1980	38	14/6/1993	18.9
3/3/1972	3.67	11/2/1985	28.05	11/7/1980	38	21/6/1993	18.63
6/3/1972	3.67	12/2/1985	27.4	18/7/1980	38	28/6/1993	18.89
7/3/1972	3.67	13/2/1985	27.8	25/7/1980	38	5/7/1993	17.93
8/3/1972	3.67	14/2/1985	27.85	1/8/1980	37.4	12/7/1993	18.12
9/3/1972	3.67	15/2/1985	27.8	8/8/1980	37.4	19/7/1993	17.68
10/3/1972	3.67	18/2/1985	27.8	15/8/1980	37.4	26/7/1993	17.67
13/3/1972	3.67	19/2/1985	27.75	22/8/1980	37.4	2/8/1993	17.67
14/3/1972	3.67	20/2/1985	27.7	29/8/1980	33.6	9/8/1993	17.58
15/3/1972	3.67	21/2/1985	27.6	5/9/1980	33.6	16/8/1993	17.84
16/3/1972	3.67	22/2/1985	28	12/9/1980	33.6	23/8/1993	18.42
17/3/1972	3.67	25/2/1985	28	19/9/1980	33.6	30/8/1993	18.63
20/3/1972	3.67	26/2/1985	28	26/9/1980	33.6	6/9/1993	17.72
21/3/1972	3.67	27/2/1985	28	3/10/1980	33.4	13/9/1993	16.98
22/3/1972	3.67	28/2/1985	28	10/10/1980	33.4	20/9/1993	17.68
23/3/1972	3.67	1/3/1985	27.2	17/10/1980	33.4	27/9/1993	17.52
24/3/1972	3.67	4/3/1985	27.75	24/10/1980	33.4	4/10/1993	18.4
27/3/1972	3.67	5/3/1985	27.55	31/10/1980	37.9	11/10/1993	18.76
28/3/1972	3.67	6/3/1985	27.75	7/11/1980	37.9	18/10/1993	18.13
29/3/1972	3.67	7/3/1985	28	14/11/1980	37.9	25/10/1993	17.36
30/3/1972	3.67	8/3/1985	27.75	21/11/1980	37.9	1/11/1993	17.5
31/3/1972	3.67	11/3/1985	27.6	28/11/1980	40.85	8/11/1993	16.69
3/4/1972	3.67	12/3/1985	27.9	5/12/1980	40.85	15/11/1993	16.78
4/4/1972	3.67	13/3/1985	28.1	12/12/1980	40.85	22/11/1993	16.67
5/4/1972	3.67	14/3/1985	28.15	19/12/1980	40.85	29/11/1993	15.3
6/4/1972	3.67	15/3/1985	28.3	26/12/1980	40.85	6/12/1993	14.57
7/4/1972	3.67	18/3/1985	28.85	2/1/1981	40.15	13/12/1993	14.5
10/4/1972	3.67	19/3/1985	28.8	9/1/1981	40.15	20/12/1993	14.2
11/4/1972	3.67	20/3/1985	29	16/1/1981	40.15	27/12/1993	14.09
12/4/1972	3.67	21/3/1985	29.3	23/1/1981	40.15	3/1/1994	14.52
13/4/1972	3.67	22/3/1985	29.7	30/1/1981	40.3	10/1/1994	14.65
14/4/1972	3.67	25/3/1985	28.1	6/2/1981	40.3	17/1/1994	15.15
17/4/1972	3.67	26/3/1985	28.45	13/2/1981	40.3	24/1/1994	15.09
18/4/1972	3.67	27/3/1985	28.2	20/2/1981	40.3	31/1/1994	15.24
19/4/1972	3.67	28/3/1985	28.25	27/2/1981	38.7	7/2/1994	15.31
20/4/1972	3.67	29/3/1985	28.3	6/3/1981	38.7	14/2/1994	14.15
21/4/1972	3.67	1/4/1985	28.7	13/3/1981	38.7	21/2/1994	14.21
24/4/1972	3.67	2/4/1985	28.8	20/3/1981	38.7	28/2/1994	14.5
25/4/1972	3.67	3/4/1985	28.8	27/3/1981	38.7	7/3/1994	14.14
26/4/1972	3.67	4/4/1985	28.9	3/4/1981	38.35	14/3/1994	14.52
27/4/1972	3.67	5/4/1985	28.9	10/4/1981	38.35	21/3/1994	15.37
28/4/1972	3.64	8/4/1985	29.05	17/4/1981	38.35	28/3/1994	14.15
1/5/1972	3.64	9/4/1985	29.05	24/4/1981	38.35	4/4/1994	15.67
2/5/1972	3.64	10/4/1985	29.25	1/5/1981	37.19	11/4/1994	15.86
3/5/1972	3.64	11/4/1985	28.9	8/5/1981	37.19	18/4/1994	16.64
4/5/1972	3.64	12/4/1985	28.65	15/5/1981	37.19	25/4/1994	17.66
5/5/1972	3.64	15/4/1985	29.15	22/5/1981	37.19	2/5/1994	17.18
8/5/1972	3.64	16/4/1985	29.05	29/5/1981	35.19	9/5/1994	17.72
9/5/1972	3.64	17/4/1985	28.95	5/6/1981	35.19	16/5/1994	17.99
10/5/1972	3.64	18/4/1985	29	12/6/1981	35.19	23/5/1994	18.69
11/5/1972	3.64	19/4/1985	29.3	19/6/1981	35.19	30/5/1994	18.02
12/5/1972	3.64	22/4/1985	29.6	26/6/1981	35.19	6/6/1994	18.1
15/5/1972	3.64	23/4/1985	29.5	3/7/1981	33.25	13/6/1994	18.82
16/5/1972	3.64	24/4/1985	29.25	10/7/1981	33.25	20/6/1994	20.68
17/5/1972	3.64	25/4/1985	27.85	17/7/1981	33.25	27/6/1994	18.96
18/5/1972	3.64	26/4/1985	27.9	24/7/1981	33.25	4/7/1994	19.52
19/5/1972	3.64	29/4/1985	27.65	31/7/1981	35.06	11/7/1994	20.17
22/5/1972	3.64	30/4/1985	27.6	7/8/1981	35.06	18/7/1994	19.38
23/5/1972	3.64	1/5/1985	27.35	14/8/1981	35.06	25/7/1994	19.42
24/5/1972	3.64	2/5/1985	27.35	21/8/1981	35.06	1/8/1994	20.65
25/5/1972	3.64	3/5/1985	27.3	28/8/1981	35.06	8/8/1994	19.41
26/5/1972	3.64	6/5/1985	27.2	4/9/1981	35.8	15/8/1994	18.24
29/5/1972	3.64	7/5/1985	27.3	11/9/1981	35.8	22/8/1994	16.87
30/5/1972	3.64	8/5/1985	27.15	18/9/1981	35.8	29/8/1994	17.62
31/5/1972	3.64	9/5/1985	27.6	25/9/1981	35.8	5/9/1994	17.52
1/6/1972	3.64	10/5/1985	27.4	2/10/1981	35.91	12/9/1994	17.39
2/6/1972	3.64	13/5/1985	27.6	9/10/1981	35.91	19/9/1994	17.21
5/6/1972	3.64	14/5/1985	27.65	16/10/1981	35.91	26/9/1994	17.68
6/6/1972	3.64	15/5/1985	27.75	23/10/1981	35.91	3/10/1994	18.16
7/6/1972	3.64	16/5/1985	27.9	30/10/1981	36.54	10/10/1994	17.95
8/6/1972	3.64	17/5/1985	27.8	6/11/1981	36.54	17/10/1994	17.11
9/6/1972	3.64	20/5/1985	27.9	13/11/1981	36.54	24/10/1994	17.5
12/6/1972	3.64	21/5/1985	28	20/11/1981	36.54	31/10/1994	18.16
13/6/1972	3.64	22/5/1985	27.95	27/11/1981	36.54	7/11/1994	18.38
14/6/1972	3.64	23/5/1985	27.8	4/12/1981	37.12	14/11/1994	17.48
15/6/1972	3.64	24/5/1985	27.75	11/12/1981	37.12	21/11/1994	17.43
16/6/1972	3.64	27/5/1985	27.75	18/12/1981	37.12	28/11/1994	18.1
19/6/1972	3.64	28/5/1985	27.55	25/12/1981	37.12	5/12/1994	16.88
20/6/1972	3.64	29/5/1985	27.65	1/1/1982	36.7	12/12/1994	16.92
21/6/1972	3.64	30/5/1985	27.9	8/1/1982	35.9	19/12/1994	16.91
22/6/1972	3.64	31/5/1985	27.85	15/1/1982	35.9	26/12/1994	17.41
23/6/1972	3.64	3/6/1985	27.5	22/1/1982	36.1	2/1/1995	17.77
26/6/1972	3.64	4/6/1985	27.45	29/1/1982	35.77	9/1/1995	17.4
27/6/1972	3.64	5/6/1985	27	5/2/1982	31.11	16/1/1995	17.89
28/6/1972	3.64	6/6/1985	27.1	12/2/1982	32.8	23/1/1995	18.16
29/6/1972	3.64	7/6/1985	26.9	19/2/1982	31.63	30/1/1995	18.2
30/6/1972	3.64	10/6/1985	26.8	26/2/1982	31.07	6/2/1995	18.58
3/7/1972	3.64	11/6/1985	26.95	5/3/1982	28.9	13/2/1995	18.29
4/7/1972	3.64	12/6/1985	27	12/3/1982	28.5	20/2/1995	18.94
5/7/1972	3.64	13/6/1985	27.4	19/3/1982	29.8	27/2/1995	18.64
6/7/1972	3.64	14/6/1985	27.3	26/3/1982	29.8	6/3/1995	18.56
7/7/1972	3.64	17/6/1985	27.25	2/4/1982	29.29	13/3/1995	18.18
10/7/1972	3.64	18/6/1985	27.2	9/4/1982	29.75	20/3/1995	18.58
11/7/1972	3.64	19/6/1985	27.3	16/4/1982	29.75	27/3/1995	19.08
12/7/1972	3.64	20/6/1985	27.2	23/4/1982	31.9	3/4/1995	19.05
13/7/1972	3.64	21/6/1985	27.4	30/4/1982	31.36	10/4/1995	19.61
14/7/1972	3.64	24/6/1985	27.5	7/5/1982	33.5	17/4/1995	19.8
17/7/1972	3.64	25/6/1985	26.75	14/5/1982	34	24/4/1995	20.13
18/7/1972	3.64	26/6/1985	26.9	21/5/1982	34.5	1/5/1995	20.53
19/7/1972	3.64	27/6/1985	27.1	28/5/1982	34.5	8/5/1995	20.32
20/7/1972	3.64	28/6/1985	26.7	4/6/1982	34.17	15/5/1995	19.91
21/7/1972	3.64	1/7/1985	26.7	11/6/1982	34.4	22/5/1995	19.86
24/7/1972	3.64	2/7/1985	26.9	18/6/1982	35	29/5/1995	18.7
25/7/1972	3.64	3/7/1985	26.9	25/6/1982	34.7	5/6/1995	19.25
26/7/1972	3.64	4/7/1985	26.9	2/7/1982	34.54	12/6/1995	18.87
27/7/1972	3.64	5/7/1985	26.9	9/7/1982	33.65	19/6/1995	18.23
28/7/1972	3.64	8/7/1985	27	16/7/1982	33.35	26/6/1995	17.67
31/7/1972	3.62	9/7/1985	27.45	23/7/1982	32.88	3/7/1995	17.33
1/8/1972	3.62	10/7/1985	27.5	30/7/1982	33.22	10/7/1995	17.35
2/8/1972	3.62	11/7/1985	27.35	6/8/1982	32.88	17/7/1995	17.28
3/8/1972	3.62	12/7/1985	27.1	13/8/1982	32.15	24/7/1995	17.17
4/8/1972	3.62	15/7/1985	27.25	20/8/1982	32.25	31/7/1995	17.62
7/8/1972	3.62	16/7/1985	27.35	27/8/1982	32.25	7/8/1995	17.65
8/8/1972	3.62	17/7/1985	27.5	3/9/1982	32.34	14/8/1995	17.48
9/8/1972	3.62	18/7/1985	27.5	10/9/1982	33.5	21/8/1995	18.26
10/8/1972	3.62	19/7/1985	27.4	17/9/1982	33.5	28/8/1995	17.84
11/8/1972	3.62	22/7/1985	27.7	24/9/1982	34.5	4/9/1995	18.08
14/8/1972	3.62	23/7/1985	27.85	1/10/1982	33.86	11/9/1995	18.49
15/8/1972	3.62	24/7/1985	28	8/10/1982	34.63	18/9/1995	18.92
16/8/1972	3.62	25/7/1985	27.3	15/10/1982	34.3	25/9/1995	17.38
17/8/1972	3.62	26/7/1985	27.3	22/10/1982	34.18	2/10/1995	17.67
18/8/1972	3.62	29/7/1985	27.35	29/10/1982	34.46	9/10/1995	17.36
21/8/1972	3.62	30/7/1985	27.35	5/11/1982	34.53	16/10/1995	17.6
22/8/1972	3.62	31/7/1985	27.15	12/11/1982	34.25	23/10/1995	17.48
23/8/1972	3.62	1/8/1985	27.2	19/11/1982	33.75	30/10/1995	17.67
24/8/1972	3.62	2/8/1985	27.25	26/11/1982	32.65	6/11/1995	17.68
25/8/1972	3.62	5/8/1985	27.3	3/12/1982	33.61	13/11/1995	17.78
28/8/1972	3.62	6/8/1985	27.25	10/12/1982	31.38	20/11/1995	18.14
29/8/1972	3.62	7/8/1985	27.25	17/12/1982	31	27/11/1995	18.37
30/8/1972	3.62	8/8/1985	27.3	24/12/1982	31.75	4/12/1995	18.61
31/8/1972	3.62	9/8/1985	27.4	31/12/1982	31.58	11/12/1995	18.62
1/9/1972	3.62	12/8/1985	27.55	7/1/1983	31.75	18/12/1995	19.71
4/9/1972	3.62	13/8/1985	27.6	14/1/1983	31.75	25/12/1995	19.12
5/9/1972	3.62	14/8/1985	27.7	21/1/1983	30.6	1/1/1996	19.54
6/9/1972	3.62	15/8/1985	28	28/1/1983	31.85	8/1/1996	20.5
7/9/1972	3.62	16/8/1985	28	4/2/1983	31.26	15/1/1996	18.42
8/9/1972	3.62	19/8/1985	28	11/2/1983	28.75	22/1/1996	18.49
11/9/1972	3.62	20/8/1985	28.1	18/2/1983	29.25	29/1/1996	17.33
12/9/1972	3.62	21/8/1985	28.2	25/2/1983	29.13	5/2/1996	17.53
13/9/1972	3.62	22/8/1985	28.2	4/3/1983	28.95	12/2/1996	18.01
14/9/1972	3.62	23/8/1985	28	11/3/1983	27.87	19/2/1996	19.16
15/9/1972	3.62	26/8/1985	28.1	18/3/1983	27.88	26/2/1996	19.45
18/9/1972	3.62	27/8/1985	28.1	25/3/1983	28.3	4/3/1996	19.24
19/9/1972	3.62	28/8/1985	28.1	1/4/1983	27.97	11/3/1996	19.92
20/9/1972	3.62	29/8/1985	27.95	8/4/1983	28.55	18/3/1996	23.23
21/9/1972	3.62	30/8/1985	28.05	15/4/1983	29	25/3/1996	23.23
22/9/1972	3.62	2/9/1985	28.05	22/4/1983	29.9	1/4/1996	22.29
25/9/1972	3.62	3/9/1985	28.3	29/4/1983	29.36	8/4/1996	23.01
26/9/1972	3.62	4/9/1985	28.25	6/5/1983	30	15/4/1996	25.13
27/9/1972	3.62	5/9/1985	28	13/5/1983	29.77	22/4/1996	23.94
28/9/1972	3.62	6/9/1985	27.75	20/5/1983	29.22	29/4/1996	22.07
29/9/1972	3.62	9/9/1985	27.65	27/5/1983	29.4	6/5/1996	21.06
2/10/1972	3.62	10/9/1985	27.9	3/6/1983	29.58	13/5/1996	21.23
3/10/1972	3.62	11/9/1985	27.9	10/6/1983	29.65	20/5/1996	22.28
4/10/1972	3.62	12/9/1985	28.05	17/6/1983	30.1	27/5/1996	21.58
5/10/1972	3.62	13/9/1985	28	24/6/1983	30.25	3/6/1996	19.86
6/10/1972	3.62	16/9/1985	27.9	1/7/1983	30.08	10/6/1996	20.18
9/10/1972	3.62	17/9/1985	28.1	8/7/1983	30.5	17/6/1996	21.43
10/10/1972	3.62	18/9/1985	28.1	15/7/1983	30.5	24/6/1996	20.1
11/10/1972	3.62	19/9/1985	28.2	22/7/1983	31.05	1/7/1996	21.48
12/10/1972	3.62	20/9/1985	28.7	29/7/1983	30.74	8/7/1996	21.33
13/10/1972	3.62	23/9/1985	28.7	5/8/1983	31.05	15/7/1996	22.42
16/10/1972	3.62	24/9/1985	28.98	12/8/1983	31.35	22/7/1996	21.05
17/10/1972	3.62	25/9/1985	28.4	19/8/1983	31.3	29/7/1996	20.28
18/10/1972	3.62	26/9/1985	28.9	26/8/1983	31.3	5/8/1996	21.25
19/10/1972	3.62	27/9/1985	28.9	2/9/1983	30.95	12/8/1996	22.25
20/10/1972	3.62	30/9/1985	29.1	9/9/1983	30.3	19/8/1996	23.1
23/10/1972	3.62	1/10/1985	29.05	16/9/1983	30.3	26/8/1996	21.55
24/10/1972	3.62	2/10/1985	29.25	23/9/1983	30.4	2/9/1996	22.25
25/10/1972	3.62	3/10/1985	29.3	30/9/1983	30.4	9/9/1996	23.75
26/10/1972	3.62	4/10/1985	29.05	7/10/1983	29.75	16/9/1996	23.3
27/10/1972	3.62	7/10/1985	29.15	14/10/1983	29.9	23/9/1996	23.83
30/10/1972	3.62	8/10/1985	29.25	21/10/1983	29.75	30/9/1996	24.2
31/10/1972	3.62	9/10/1985	29	28/10/1983	29.6	7/10/1996	25.25
1/11/1972	3.62	10/10/1985	28.65	4/11/1983	29.45	14/10/1996	25.5
2/11/1972	3.62	11/10/1985	28.75	11/11/1983	28.9	21/10/1996	25.85
3/11/1972	3.62	14/10/1985	29	18/11/1983	28.5	28/10/1996	24.75
6/11/1972	3.62	15/10/1985	29.35	25/11/1983	28.8	4/11/1996	22.8
7/11/1972	3.62	16/10/1985	29.35	2/12/1983	28.75	11/11/1996	23.35
8/11/1972	3.62	17/10/1985	29.55	9/12/1983	28.7	18/11/1996	23.85
9/11/1972	3.62	18/10/1985	29.52	16/12/1983	28.45	25/11/1996	25.75
10/11/1972	3.62	21/10/1985	29.95	23/12/1983	28.7	2/12/1996	24.7
13/11/1972	3.62	22/10/1985	30.3	30/12/1983	28.66	9/12/1996	25.15
14/11/1972	3.62	23/10/1985	30.35	6/1/1984	29.3	16/12/1996	25.7
15/11/1972	3.62	24/10/1985	30.05	13/1/1984	29.15	23/12/1996	26.4
16/11/1972	3.62	25/10/1985	30.05	20/1/1984	29.6	30/12/1996	25.35
17/11/1972	3.62	28/10/1985	30.15	27/1/1984	30.05	6/1/1997	26.25
20/11/1972	3.62	29/10/1985	30.2	3/2/1984	30.1	13/1/1997	25.2
21/11/1972	3.62	30/10/1985	30.1	10/2/1984	29.4	20/1/1997	25.1
22/11/1972	3.62	31/10/1985	30.4	17/2/1984	29.7	27/1/1997	23.85
23/11/1972	3.62	1/11/1985	30.35	24/2/1984	29.7	3/2/1997	24.2
24/11/1972	3.62	4/11/1985	30.2	2/3/1984	30	10/2/1997	22.45
27/11/1972	3.62	5/11/1985	29.95	9/3/1984	30.2	17/2/1997	22.4
28/11/1972	3.62	6/11/1985	30.35	16/3/1984	29.75	24/2/1997	21
29/11/1972	3.62	7/11/1985	30.4	23/3/1984	29.85	3/3/1997	20.25
30/11/1972	3.62	8/11/1985	30.45	30/3/1984	30.01	10/3/1997	20.5
1/12/1972	3.62	11/11/1985	30.7	6/4/1984	30.2	17/3/1997	20.79
4/12/1972	3.62	12/11/1985	30.8	13/4/1984	30.2	24/3/1997	20.89
5/12/1972	3.62	13/11/1985	31.05	20/4/1984	29.85	31/3/1997	20.35
6/12/1972	3.62	14/11/1985	31.35	27/4/1984	29.9	7/4/1997	19.25
7/12/1972	3.62	15/11/1985	30.95	4/5/1984	29.45	14/4/1997	19.9
8/12/1972	3.62	18/11/1985	30.9	11/5/1984	29.55	21/4/1997	20.35
11/12/1972	3.62	19/11/1985	31.3	18/5/1984	30.4	28/4/1997	19.85
12/12/1972	3.62	20/11/1985	31.7	25/5/1984	29.75	5/5/1997	19.6
13/12/1972	3.62	21/11/1985	31.8	1/6/1984	29.95	12/5/1997	21.4
14/12/1972	3.62	22/11/1985	31.7	8/6/1984	29.55	19/5/1997	21.5
15/12/1972	3.62	25/11/1985	31	15/6/1984	29.25	26/5/1997	21.6
18/12/1972	3.62	26/11/1985	30.75	22/6/1984	28.25	2/6/1997	21.15
19/12/1972	3.62	27/11/1985	29.75	29/6/1984	29.02	9/6/1997	18.85
20/12/1972	3.62	28/11/1985	29.72	6/7/1984	28.5	16/6/1997	19.1
21/12/1972	3.62	29/11/1985	29.75	13/7/1984	28.4	23/6/1997	18.9
22/12/1972	3.62	2/12/1985	29.75	20/7/1984	27.6	30/6/1997	19.78
25/12/1972	3.62	3/12/1985	29.05	27/7/1984	26.9	7/7/1997	19.53
26/12/1972	3.62	4/12/1985	28.64	3/8/1984	27.5	14/7/1997	18.95
27/12/1972	3.62	5/12/1985	28.88	10/8/1984	28.5	21/7/1997	19.23
28/12/1972	3.62	6/12/1985	28.74	17/8/1984	28.4	28/7/1997	19.71
29/12/1972	3.62	9/12/1985	27.52	24/8/1984	28.55	4/8/1997	20.8
1/1/1973	3.62	10/12/1985	27.2	31/8/1984	28.21	11/8/1997	19.72
2/1/1973	3.62	11/12/1985	26.8	7/9/1984	27.9	18/8/1997	19.94
3/1/1973	3.62	12/12/1985	27.25	14/9/1984	28.5	25/8/1997	19.29
4/1/1973	3.62	13/12/1985	27.37	21/9/1984	28.4	1/9/1997	19.66
5/1/1973	3.62	16/12/1985	27.27	28/9/1984	28.23	8/9/1997	19.43
8/1/1973	3.62	17/12/1985	26.42	5/10/1984	28.45	15/9/1997	19.3
9/1/1973	3.62	18/12/1985	25.79	12/10/1984	28.3	22/9/1997	19.61
10/1/1973	3.62	19/12/1985	26.65	19/10/1984	26.8	29/9/1997	21.29
11/1/1973	3.62	20/12/1985	26.4	26/10/1984	27.85	6/10/1997	21.97
12/1/1973	3.62	23/12/1985	26.4	2/11/1984	28	13/10/1997	21.34
15/1/1973	3.62	24/12/1985	26.4	9/11/1984	27.9	20/10/1997	20.69
16/1/1973	3.62	25/12/1985	26.4	16/11/1984	27.85	27/10/1997	21.03
17/1/1973	3.62	26/12/1985	26.2	23/11/1984	27.15	3/11/1997	20.91
18/1/1973	3.62	27/12/1985	26.2	30/11/1984	27.62	10/11/1997	20.46
19/1/1973	3.62	30/12/1985	26.65	7/12/1984	27.45	17/11/1997	20.29
22/1/1973	3.62	31/12/1985	26.3	14/12/1984	27.15	24/11/1997	19.41
23/1/1973	3.62	1/1/1986	26.3	21/12/1984	26.5	1/12/1997	18.76
24/1/1973	3.62	2/1/1986	25.56	28/12/1984	26.5	8/12/1997	18.86
25/1/1973	3.62	3/1/1986	26	4/1/1985	25.85	15/12/1997	18.18
26/1/1973	3.62	6/1/1986	26.53	11/1/1985	27.15	22/12/1997	18.29
29/1/1973	3.62	7/1/1986	25.85	18/1/1985	27	29/12/1997	17.64
30/1/1973	3.62	8/1/1986	25.87	25/1/1985	27.05	5/1/1998	16.95
31/1/1973	3.78	9/1/1986	26.03	1/2/1985	28.2	12/1/1998	16.53
1/2/1973	3.78	10/1/1986	25.65	8/2/1985	29	19/1/1998	16.48
2/2/1973	3.78	13/1/1986	25.08	15/2/1985	28.35	26/1/1998	16.96
5/2/1973	3.78	14/1/1986	24.97	22/2/1985	28.05	2/2/1998	17.07
6/2/1973	3.78	15/1/1986	25.18	1/3/1985	27.65	9/2/1998	16.59
7/2/1973	3.78	16/1/1986	23.98	8/3/1985	28.6	16/2/1998	16.03
8/2/1973	3.78	17/1/1986	23.63	15/3/1985	27.75	23/2/1998	15.23
9/2/1973	3.78	20/1/1986	21.33	22/3/1985	28.05	2/3/1998	15.32
12/2/1973	3.78	21/1/1986	20.61	29/3/1985	28.17	9/3/1998	14.58
13/2/1973	3.78	22/1/1986	20.25	5/4/1985	28.5	16/3/1998	13.41
14/2/1973	3.78	23/1/1986	19.93	12/4/1985	27.85	23/3/1998	16.5
15/2/1973	3.78	24/1/1986	19.45	19/4/1985	27.75	30/3/1998	16.32
16/2/1973	3.78	27/1/1986	20.87	26/4/1985	27.3	6/4/1998	15.48
19/2/1973	3.78	28/1/1986	19.45	3/5/1985	26.8	13/4/1998	15.35
20/2/1973	3.78	29/1/1986	19.61	10/5/1985	26.35	20/4/1998	15.52
21/2/1973	3.78	30/1/1986	19.58	17/5/1985	26.75	27/4/1998	15.43
22/2/1973	3.78	31/1/1986	18.95	24/5/1985	26.85	4/5/1998	15.95
23/2/1973	3.78	3/2/1986	17.42	31/5/1985	26.74	11/5/1998	15.26
26/2/1973	3.78	4/2/1986	15.58	7/6/1985	26.65	18/5/1998	14.15
27/2/1973	3.78	5/2/1986	16.28	14/6/1985	26	25/5/1998	14.81
28/2/1973	3.78	6/2/1986	16.6	21/6/1985	26.45	1/6/1998	14.99
1/3/1973	3.78	7/2/1986	17.7	28/6/1985	26.46	8/6/1998	14.49
2/3/1973	3.78	10/2/1986	16.78	5/7/1985	26.75	15/6/1998	11.69
5/3/1973	3.78	11/2/1986	16.28	12/7/1985	26.9	22/6/1998	13.54
6/3/1973	3.78	12/2/1986	15.74	19/7/1985	26.9	29/6/1998	14.29
7/3/1973	3.78	13/2/1986	16.43	26/7/1985	27.05	6/7/1998	13.87
8/3/1973	3.78	14/2/1986	16.03	2/8/1985	27.15	13/7/1998	14.06
9/3/1973	3.78	17/2/1986	16.03	9/8/1985	27.05	20/7/1998	13.44
12/3/1973	3.78	18/2/1986	14.7	16/8/1985	27.3	27/7/1998	14.37
13/3/1973	3.78	19/2/1986	15.08	23/8/1985	27.55	3/8/1998	13.93
14/3/1973	3.78	20/2/1986	14.13	30/8/1985	27.37	10/8/1998	13.06
15/3/1973	3.78	21/2/1986	13.63	6/9/1985	27.75	17/8/1998	13.26
16/3/1973	3.78	24/2/1986	14.68	13/9/1985	27.2	24/8/1998	13.53
19/3/1973	3.78	25/2/1986	14.68	20/9/1985	27.5	31/8/1998	13.29
20/3/1973	3.78	26/2/1986	14.62	27/9/1985	28.25	7/9/1998	14.59
21/3/1973	3.78	27/2/1986	14.05	4/10/1985	28.7	14/9/1998	14.46
22/3/1973	3.78	28/2/1986	13.23	11/10/1985	28.6	21/9/1998	15.58
23/3/1973	3.78	3/3/1986	11.98	18/10/1985	28.1	28/9/1998	15.74
26/3/1973	3.78	4/3/1986	11.98	25/10/1985	28.8	5/10/1998	15.24
27/3/1973	3.78	5/3/1986	12.03	1/11/1985	29.1	12/10/1998	14.47
28/3/1973	3.78	6/3/1986	13.13	8/11/1985	29.3	19/10/1998	13.39
29/3/1973	3.78	7/3/1986	12.24	15/11/1985	29.65	26/10/1998	14.39
30/3/1973	3.78	10/3/1986	12.94	22/11/1985	30.6	2/11/1998	14.45
2/4/1973	3.78	11/3/1986	13.23	29/11/1985	29.75	9/11/1998	13.39
3/4/1973	3.78	12/3/1986	14.05	6/12/1985	28.25	16/11/1998	12.81
4/4/1973	3.78	13/3/1986	12.6	13/12/1985	26.6	23/11/1998	11.81
5/4/1973	3.78	14/3/1986	12.55	20/12/1985	25.55	30/11/1998	11.37
6/4/1973	3.78	17/3/1986	13.28	27/12/1985	26.6	7/12/1998	11.61
9/4/1973	3.78	18/3/1986	14.03	3/1/1986	26.2	14/12/1998	11.3
10/4/1973	3.78	19/3/1986	13.25	10/1/1986	25.2	21/12/1998	10.86
11/4/1973	3.78	20/3/1986	12.75	17/1/1986	21.7	28/12/1998	11.59
12/4/1973	3.78	21/3/1986	13.95	24/1/1986	18.2	4/1/1999	12.42
13/4/1973	3.78	24/3/1986	12.2	31/1/1986	22.37	11/1/1999	13.43
16/4/1973	3.78	25/3/1986	12.43	7/2/1986	18.2	18/1/1999	12.21
17/4/1973	3.78	26/3/1986	12.03	14/2/1986	16.9	25/1/1999	12.41
18/4/1973	3.78	27/3/1986	11.35	21/2/1986	16.4	1/2/1999	12.36
19/4/1973	3.78	28/3/1986	11.35	28/2/1986	17.29	8/2/1999	11.65
20/4/1973	3.78	31/3/1986	10.25	7/3/1986	15	15/2/1999	11.9
23/4/1973	3.78	1/4/1986	11.13	14/3/1986	13.45	22/2/1999	11.97
24/4/1973	3.78	2/4/1986	11.35	21/3/1986	14.4	1/3/1999	12.28
25/4/1973	3.78	3/4/1986	11.7	28/3/1986	11.55	8/3/1999	13.63
26/4/1973	3.78	4/4/1986	12.75	4/4/1986	13.6	15/3/1999	14.48
27/4/1973	3.78	7/4/1986	14.39	11/4/1986	13.9	22/3/1999	15.51
30/4/1973	4.02	8/4/1986	12.83	18/4/1986	11.35	29/3/1999	16.46
1/5/1973	4.02	9/4/1986	13	25/4/1986	12.5	5/4/1999	16.94
2/5/1973	4.02	10/4/1986	13.45	2/5/1986	13.75	12/4/1999	16.44
3/5/1973	4.02	11/4/1986	13.63	9/5/1986	14.75	19/4/1999	17.82
4/5/1973	4.02	14/4/1986	12.94	16/5/1986	15.2	26/4/1999	17.67
7/5/1973	4.02	15/4/1986	12.72	23/5/1986	14.35	3/5/1999	18.83
8/5/1973	4.02	16/4/1986	11.5	30/5/1986	14.24	10/5/1999	18.57
9/5/1973	4.02	17/4/1986	11.75	6/6/1986	11.85	17/5/1999	17.76
10/5/1973	4.02	18/4/1986	11.88	13/6/1986	12.35	24/5/1999	16.77
11/5/1973	4.02	21/4/1986	12.48	20/6/1986	11.4	31/5/1999	16.85
14/5/1973	4.02	22/4/1986	13.13	27/6/1986	11.6	7/6/1999	17.91
15/5/1973	4.02	23/4/1986	13.7	4/7/1986	10	14/6/1999	18.24
16/5/1973	4.02	24/4/1986	13.65	11/7/1986	8.9	21/6/1999	17.79
17/5/1973	4.02	25/4/1986	14.23	18/7/1986	9.75	28/6/1999	18.22
18/5/1973	4.02	28/4/1986	13.34	25/7/1986	8.85	5/7/1999	19.7
21/5/1973	4.02	29/4/1986	13.63	1/8/1986	9.5	12/7/1999	19.92
22/5/1973	4.02	30/4/1986	13.38	8/8/1986	12.7	19/7/1999	20.28
23/5/1973	4.02	1/5/1986	13.8	15/8/1986	14.4	26/7/1999	20.49
24/5/1973	4.02	2/5/1986	14.65	22/8/1986	13.95	2/8/1999	20.46
25/5/1973	4.02	5/5/1986	14.32	29/8/1986	13.43	9/8/1999	21.26
28/5/1973	4.02	6/5/1986	14.43	5/9/1986	15.45	16/8/1999	21.34
29/5/1973	4.02	7/5/1986	15.13	12/9/1986	14.6	23/8/1999	21.61
30/5/1973	4.02	8/5/1986	15.7	19/9/1986	14	30/8/1999	21.93
31/5/1973	4.02	9/5/1986	15.83	26/9/1986	13.65	6/9/1999	22
1/6/1973	4.02	12/5/1986	15.75	3/10/1986	13.7	13/9/1999	24.18
4/6/1973	4.02	13/5/1986	15.65	10/10/1986	13.65	20/9/1999	24.32
5/6/1973	4.02	14/5/1986	15.53	17/10/1986	13.85	27/9/1999	24.63
6/6/1973	4.02	15/5/1986	15.68	24/10/1986	13.8	4/10/1999	23.71
7/6/1973	4.02	16/5/1986	16.08	31/10/1986	13.81	11/10/1999	21.58
8/6/1973	4.02	19/5/1986	17.13	7/11/1986	14.2	18/10/1999	22.44
11/6/1973	4.02	20/5/1986	16.18	14/11/1986	15.2	25/10/1999	23.22
12/6/1973	4.02	21/5/1986	15.53	21/11/1986	15	1/11/1999	22.44
13/6/1973	4.02	22/5/1986	16.04	28/11/1986	14.57	8/11/1999	23.28
14/6/1973	4.02	23/5/1986	16.95	5/12/1986	14.7	15/11/1999	25.31
15/6/1973	4.02	26/5/1986	16.95	12/12/1986	15.45	22/11/1999	28.03
18/6/1973	4.02	27/5/1986	15.1	19/12/1986	16.25	29/11/1999	25.84
19/6/1973	4.02	28/5/1986	14.65	26/12/1986	17	6/12/1999	26.67
20/6/1973	4.02	29/5/1986	14.5	2/1/1987	18.2	13/12/1999	25.37
21/6/1973	4.02	30/5/1986	14.3	9/1/1987	18.35	20/12/1999	26.55
22/6/1973	4.02	2/6/1986	13.8	16/1/1987	18.7	27/12/1999	26.36
25/6/1973	4.02	3/6/1986	13.35	23/1/1987	18.5	3/1/2000	25.76
26/6/1973	4.02	4/6/1986	13.15	30/1/1987	18.42	10/1/2000	24.71
27/6/1973	4.02	5/6/1986	13.2	6/2/1987	18.1	17/1/2000	28.01
28/6/1973	4.02	6/6/1986	12.72	13/2/1987	17.4	24/1/2000	29.25
29/6/1973	4.25	9/6/1986	12.6	20/2/1987	17.3	31/1/2000	27.65
2/7/1973	4.25	10/6/1986	12.38	27/2/1987	17.29	7/2/2000	28.4
3/7/1973	4.25	11/6/1986	13.51	6/3/1987	17.45	14/2/2000	30.3
4/7/1973	4.25	12/6/1986	13.69	13/3/1987	17.85	21/2/2000	29.51
5/7/1973	4.25	13/6/1986	13.82	20/3/1987	18.2	28/2/2000	30.11
6/7/1973	4.25	16/6/1986	13.64	27/3/1987	18.4	6/3/2000	32.19
9/7/1973	4.25	17/6/1986	13.65	3/4/1987	18.7	13/3/2000	32.11
10/7/1973	4.25	18/6/1986	13.61	10/4/1987	17.75	20/3/2000	29.33
11/7/1973	4.25	19/6/1986	13.73	17/4/1987	17.85	27/3/2000	27.59
12/7/1973	4.25	20/6/1986	14.44	24/4/1987	18.2	3/4/2000	26.28
13/7/1973	4.25	23/6/1986	14.05	1/5/1987	18.85	10/4/2000	23.91
16/7/1973	4.25	24/6/1986	13.97	8/5/1987	18.6	17/4/2000	26.06
17/7/1973	4.25	25/6/1986	13.23	15/5/1987	18.95	24/4/2000	27.41
18/7/1973	4.25	26/6/1986	13.14	22/5/1987	18.65	1/5/2000	25.84
19/7/1973	4.25	27/6/1986	13.38	29/5/1987	18.79	8/5/2000	28.05
20/7/1973	4.25	30/6/1986	12.8	5/6/1987	18.8	15/5/2000	29.95
23/7/1973	4.25	1/7/1986	12.38	12/6/1987	18.75	22/5/2000	28.62
24/7/1973	4.25	2/7/1986	12.04	19/6/1987	19.05	29/5/2000	29.76
25/7/1973	4.25	3/7/1986	11.7	26/6/1987	19.1	5/6/2000	29.87
26/7/1973	4.25	4/7/1986	11.7	3/7/1987	19.35	12/6/2000	31.76
27/7/1973	4.25	7/7/1986	11.17	10/7/1987	19.8	19/6/2000	31.57
30/7/1973	4.25	8/7/1986	11.18	17/7/1987	20.65	26/6/2000	31.56
31/7/1973	4.42	9/7/1986	11	24/7/1987	19.35	3/7/2000	32.44
1/8/1973	4.42	10/7/1986	11.13	31/7/1987	20	10/7/2000	29.51
2/8/1973	4.42	11/7/1986	11.13	7/8/1987	19.7	17/7/2000	30.71
3/8/1973	4.42	14/7/1986	11.22	14/8/1987	19.25	24/7/2000	27.97
6/8/1973	4.42	15/7/1986	11.85	21/8/1987	17.9	31/7/2000	27.5
7/8/1973	4.42	16/7/1986	12.67	28/8/1987	18.3	7/8/2000	28.93
8/8/1973	4.42	17/7/1986	12.3	4/9/1987	18	14/8/2000	31.92
9/8/1973	4.42	18/7/1986	12.8	11/9/1987	18.1	21/8/2000	32.42
10/8/1973	4.42	21/7/1986	13.06	18/9/1987	18.3	28/8/2000	32.92
13/8/1973	4.42	22/7/1986	10.88	25/9/1987	18.6	4/9/2000	33.42
14/8/1973	4.42	23/7/1986	10.82	2/10/1987	18.65	11/9/2000	35.14
15/8/1973	4.42	24/7/1986	10.95	9/10/1987	18.7	18/9/2000	36.75
16/8/1973	4.42	25/7/1986	10.82	16/10/1987	19.15	25/9/2000	31.5
17/8/1973	4.42	28/7/1986	11.08	23/10/1987	19	2/10/2000	32.05
20/8/1973	4.42	29/7/1986	11.63	30/10/1987	18.8	9/10/2000	31.98
21/8/1973	4.42	30/7/1986	11.72	6/11/1987	17.7	16/10/2000	33.18
22/8/1973	4.42	31/7/1986	11.22	13/11/1987	17.75	23/10/2000	34.9
23/8/1973	4.42	1/8/1986	11.55	20/11/1987	17.7	30/10/2000	32.86
24/8/1973	4.42	4/8/1986	14	27/11/1987	17.75	6/11/2000	33.02
27/8/1973	4.42	5/8/1986	14.35	4/12/1987	17.8	13/11/2000	34.3
28/8/1973	4.42	6/8/1986	14.8	11/12/1987	17.75	20/11/2000	35.98
29/8/1973	4.42	7/8/1986	15.17	18/12/1987	15.8	27/11/2000	35.73
30/8/1973	4.42	8/8/1986	14.82	25/12/1987	17.65	4/12/2000	31.28
31/8/1973	4.58	11/8/1986	14.91	1/1/1988	17.95	11/12/2000	29.75
3/9/1973	4.58	12/8/1986	15.5	8/1/1988	16.85	18/12/2000	29.52
4/9/1973	4.58	13/8/1986	15.27	15/1/1988	16.6	25/12/2000	26.16
5/9/1973	4.58	14/8/1986	15.42	22/1/1988	16.95	1/1/2001	26.72
6/9/1973	4.58	15/8/1986	15.82	29/1/1988	16.25	8/1/2001	27.44
7/9/1973	4.58	18/8/1986	15.57	5/2/1988	16.35	15/1/2001	30.07
10/9/1973	4.58	19/8/1986	14.97	12/2/1988	15.8	22/1/2001	32.21
11/9/1973	4.58	20/8/1986	15.22	19/2/1988	15.8	29/1/2001	29.07
12/9/1973	4.58	21/8/1986	15.22	26/2/1988	14.45	5/2/2001	30.55
13/9/1973	4.58	22/8/1986	15.47	4/3/1988	14.25	12/2/2001	30.52
14/9/1973	4.58	25/8/1986	15.48	11/3/1988	14.75	19/2/2001	29.22
17/9/1973	4.58	26/8/1986	15.77	18/3/1988	14.95	26/2/2001	28.27
18/9/1973	4.58	27/8/1986	15.82	25/3/1988	15.55	5/3/2001	28.61
19/9/1973	4.58	28/8/1986	15.82	1/4/1988	15.75	12/3/2001	27.91
20/9/1973	4.58	29/8/1986	15.92	8/4/1988	15.4	19/3/2001	26.17
21/9/1973	4.58	1/9/1986	15.92	15/4/1988	17	26/3/2001	27.4
24/9/1973	4.58	2/9/1986	16.42	22/4/1988	17.05	2/4/2001	25.7
25/9/1973	4.58	3/9/1986	16.02	29/4/1988	16.85	9/4/2001	27.45
26/9/1973	4.58	4/9/1986	16.17	6/5/1988	16.5	16/4/2001	28.81
27/9/1973	4.58	5/9/1986	15.63	13/5/1988	16.4	23/4/2001	26.97
28/9/1973	4.58	8/9/1986	15.63	20/5/1988	16.65	30/4/2001	28.48
1/10/1973	4.58	9/9/1986	15	27/5/1988	16.2	7/5/2001	27.79
2/10/1973	4.58	10/9/1986	14.9	3/6/1988	16.4	14/5/2001	28.83
3/10/1973	4.58	11/9/1986	15.04	10/6/1988	15.75	21/5/2001	29.96
4/10/1973	4.58	12/9/1986	15.05	17/6/1988	15.35	28/5/2001	28.08
5/10/1973	4.58	15/9/1986	14.31	24/6/1988	15.2	4/6/2001	28.14
8/10/1973	4.58	16/9/1986	13.8	1/7/1988	13.85	11/6/2001	28.94
9/10/1973	4.58	17/9/1986	14.02	8/7/1988	14.9	18/6/2001	27.55
10/10/1973	4.58	18/9/1986	14.55	15/7/1988	14.3	25/6/2001	27.11
11/10/1973	4.58	19/9/1986	14.46	22/7/1988	15.9	2/7/2001	26.02
12/10/1973	4.58	22/9/1986	13.93	29/7/1988	15.8	9/7/2001	27.63
15/10/1973	4.58	23/9/1986	14.3	5/8/1988	15	16/7/2001	26.02
16/10/1973	4.58	24/9/1986	14.55	12/8/1988	14.9	23/7/2001	25.88
17/10/1973	4.58	25/9/1986	14.27	19/8/1988	15.05	30/7/2001	26.6
18/10/1973	4.58	26/9/1986	14.42	26/8/1988	14.65	6/8/2001	27.7
19/10/1973	4.58	29/9/1986	14.92	2/9/1988	13.9	13/8/2001	27.85
22/10/1973	4.58	30/9/1986	14.7	9/9/1988	12.95	20/8/2001	27.2
23/10/1973	4.58	1/10/1986	15.22	16/9/1988	13.25	27/8/2001	26.69
24/10/1973	4.58	2/10/1986	15.38	23/9/1988	13.15	3/9/2001	26.65
25/10/1973	4.58	3/10/1986	14.86	30/9/1988	11.8	10/9/2001	27.66
26/10/1973	4.58	6/10/1986	14.82	7/10/1988	11.55	17/9/2001	28.84
29/10/1973	4.58	7/10/1986	15.6	14/10/1988	13.35	24/9/2001	21.46
30/10/1973	4.58	8/10/1986	15.35	21/10/1988	13.3	1/10/2001	23.12
31/10/1973	4.6	9/10/1986	15.05	28/10/1988	12.65	8/10/2001	22.25
1/11/1973	4.6	10/10/1986	14.97	4/11/1988	12.65	15/10/2001	22.37
2/11/1973	4.6	13/10/1986	14.97	11/11/1988	12.9	22/10/2001	21.78
5/11/1973	4.6	14/10/1986	14.55	18/11/1988	11.7	29/10/2001	22.1
6/11/1973	4.6	15/10/1986	14.82	25/11/1988	14.6	5/11/2001	20
7/11/1973	4.6	16/10/1986	14.52	2/12/1988	14.8	12/11/2001	21.26
8/11/1973	4.6	17/10/1986	14.85	9/12/1988	15.15	19/11/2001	17.74
9/11/1973	4.6	20/10/1986	15.16	16/12/1988	15.25	26/11/2001	18.69
12/11/1973	4.6	21/10/1986	15.22	23/12/1988	15.5	3/12/2001	20.27
13/11/1973	4.6	22/10/1986	14.85	30/12/1988	16.35	10/12/2001	18.32
14/11/1973	4.6	23/10/1986	14.88	6/1/1989	17.1	17/12/2001	19.28
15/11/1973	4.6	24/10/1986	14.92	13/1/1989	17.45	24/12/2001	19.3
16/11/1973	4.6	27/10/1986	14.4	20/1/1989	17.45	31/12/2001	19.96
19/11/1973	4.6	28/10/1986	14.17	27/1/1989	17.15	7/1/2002	21.42
20/11/1973	4.6	29/10/1986	13.72	3/2/1989	16.85	14/1/2002	18.88
21/11/1973	4.6	30/10/1986	15.07	10/2/1989	15.65	21/1/2002	18.02
22/11/1973	4.6	31/10/1986	15.25	17/2/1989	16.75	28/1/2002	20.05
23/11/1973	4.6	3/11/1986	14.7	24/2/1989	17.1	4/2/2002	20.02
26/11/1973	4.6	4/11/1986	15.05	3/3/1989	18.05	11/2/2002	21.29
27/11/1973	4.6	5/11/1986	14.92	10/3/1989	18.35	18/2/2002	21.47
28/11/1973	4.6	6/11/1986	15.07	17/3/1989	18.95	25/2/2002	20.24
29/11/1973	4.6	7/11/1986	15.15	24/3/1989	19.6	4/3/2002	22.55
30/11/1973	4.6	10/11/1986	15.3	31/3/1989	19.4	11/3/2002	24.36
3/12/1973	4.6	11/11/1986	15.38	7/4/1989	19.35	18/3/2002	25.03
4/12/1973	4.6	12/11/1986	15.32	14/4/1989	19.35	25/3/2002	25.69
5/12/1973	4.6	13/11/1986	15.55	21/4/1989	20.85	1/4/2002	26.82
6/12/1973	4.6	14/11/1986	15.67	28/4/1989	19.2	8/4/2002	26.16
7/12/1973	4.6	17/11/1986	15.61	5/5/1989	19.2	15/4/2002	24.53
10/12/1973	4.6	18/11/1986	15.64	12/5/1989	18.95	22/4/2002	26.28
11/12/1973	4.6	19/11/1986	15.51	19/5/1989	18.05	29/4/2002	27.45
12/12/1973	4.6	20/11/1986	15.1	26/5/1989	17.55	6/5/2002	26.11
13/12/1973	4.6	21/11/1986	15.13	2/6/1989	18.2	13/5/2002	28.62
14/12/1973	4.6	24/11/1986	14.97	9/6/1989	18	20/5/2002	28.24
17/12/1973	4.6	25/11/1986	15.05	16/6/1989	16.4	27/5/2002	26.69
18/12/1973	4.6	26/11/1986	15	23/6/1989	17.85	3/6/2002	25.1
19/12/1973	4.6	27/11/1986	15	30/6/1989	18.1	10/6/2002	24.24
20/12/1973	4.6	28/11/1986	15	7/7/1989	17.95	17/6/2002	25.98
21/12/1973	4.6	1/12/1986	15.29	14/7/1989	17.8	24/6/2002	26.34
24/12/1973	4.6	2/12/1986	15.21	21/7/1989	17.9	1/7/2002	26.82
25/12/1973	4.6	3/12/1986	15.13	28/7/1989	17.2	8/7/2002	26.17
26/12/1973	4.6	4/12/1986	15.19	4/8/1989	17.05	15/7/2002	27.23
27/12/1973	4.6	5/12/1986	15.13	11/8/1989	17.05	22/7/2002	26.61
28/12/1973	4.6	8/12/1986	15	18/8/1989	17	29/7/2002	26.54
31/12/1973	4.6	9/12/1986	14.92	25/8/1989	16.95	5/8/2002	26.55
1/1/1974	4.6	10/12/1986	15.11	1/9/1989	17.3	12/8/2002	27.84
2/1/1974	4.6	11/12/1986	15.48	8/9/1989	17.8	19/8/2002	29.86
3/1/1974	4.6	12/12/1986	16.13	15/9/1989	17.8	26/8/2002	29.23
4/1/1974	4.6	15/12/1986	16.38	22/9/1989	17.45	2/9/2002	28.97
7/1/1974	4.6	16/12/1986	16.11	29/9/1989	18.4	9/9/2002	29.8
8/1/1974	4.6	17/12/1986	15.83	6/10/1989	18.55	16/9/2002	29.14
9/1/1974	4.6	18/12/1986	16.27	13/10/1989	19.5	23/9/2002	30.85
10/1/1974	4.6	19/12/1986	16.55	20/10/1989	19.3	30/9/2002	30.59
11/1/1974	4.6	22/12/1986	16.94	27/10/1989	18.95	7/10/2002	29.65
14/1/1974	4.6	23/12/1986	16.92	3/11/1989	18.85	14/10/2002	30.06
15/1/1974	4.6	24/12/1986	17.25	10/11/1989	19.1	21/10/2002	28.31
16/1/1974	4.6	25/12/1986	17.25	17/11/1989	18.8	28/10/2002	27.25
17/1/1974	4.6	26/12/1986	17.25	24/11/1989	18.5	4/11/2002	26.89
18/1/1974	4.6	29/12/1986	17.65	1/12/1989	18.75	11/11/2002	26.02
21/1/1974	4.6	30/12/1986	17.72	8/12/1989	19.15	18/11/2002	26.71
22/1/1974	4.6	31/12/1986	17.92	15/12/1989	19.7	25/11/2002	27.01
23/1/1974	4.6	1/1/1987	17.92	22/12/1989	20.4	2/12/2002	27.27
24/1/1974	4.6	2/1/1987	18.13	29/12/1989	20.95	9/12/2002	27.29
25/1/1974	4.6	5/1/1987	17.97	5/1/1990	23	16/12/2002	30.15
28/1/1974	4.6	6/1/1987	18.21	12/1/1990	21.2	23/12/2002	32.09
29/1/1974	4.6	7/1/1987	18.27	19/1/1990	20.9	30/12/2002	31.41
30/1/1974	4.6	8/1/1987	18.63	26/1/1990	20.45	6/1/2003	32.29
31/1/1974	15.5	9/1/1987	18.77	2/2/1990	20.05	13/1/2003	32.08
1/2/1974	15.5	12/1/1987	18.99	9/2/1990	19.6	20/1/2003	33.88
4/2/1974	15.5	13/1/1987	18.86	16/2/1990	19.9	27/1/2003	32.43
5/2/1974	15.5	14/1/1987	19.13	23/2/1990	19.1	3/2/2003	32.84
6/2/1974	15.5	15/1/1987	19.09	2/3/1990	19.15	10/2/2003	34.46
7/2/1974	15.5	16/1/1987	19.13	9/3/1990	18.8	17/2/2003	36.61
8/2/1974	15.5	19/1/1987	18.7	16/3/1990	18.45	24/2/2003	37.29
11/2/1974	15.5	20/1/1987	18.72	23/3/1990	17.95	3/3/2003	36.1
12/2/1974	15.5	21/1/1987	18.6	30/3/1990	18.05	10/3/2003	37.18
13/2/1974	15.5	22/1/1987	18.76	6/4/1990	17.55	17/3/2003	34.92
14/2/1974	15.5	23/1/1987	18.59	13/4/1990	16.45	24/3/2003	29.51
15/2/1974	15.5	26/1/1987	18.63	20/4/1990	16.45	31/3/2003	31.14
18/2/1974	15.5	27/1/1987	18.47	27/4/1990	16.55	7/4/2003	27.76
19/2/1974	15.5	28/1/1987	18.56	4/5/1990	15.65	14/4/2003	28.41
20/2/1974	15.5	29/1/1987	18.68	11/5/1990	17.3	21/4/2003	30.76
21/2/1974	15.5	30/1/1987	18.72	18/5/1990	17.4	28/4/2003	25.25
22/2/1974	15.5	2/2/1987	18.59	25/5/1990	16.4	5/5/2003	26.43
25/2/1974	15.5	3/2/1987	18.38	1/6/1990	15.75	12/5/2003	27.34
26/2/1974	15.5	4/2/1987	18.26	8/6/1990	15	19/5/2003	28.84
27/2/1974	15.5	5/2/1987	18.56	15/6/1990	15.6	26/5/2003	29.74
28/2/1974	15.5	6/2/1987	18.44	22/6/1990	16.2	2/6/2003	30.72
1/3/1974	15.5	9/2/1987	18.36	29/6/1990	16.45	9/6/2003	31.36
4/3/1974	15.5	10/2/1987	18.42	6/7/1990	15.3	16/6/2003	31.14
5/3/1974	15.5	11/2/1987	18.02	13/7/1990	17.35	23/6/2003	30.22
6/3/1974	15.5	12/2/1987	18.05	20/7/1990	18.1	30/6/2003	30.15
7/3/1974	15.5	13/2/1987	17.82	27/7/1990	19	7/7/2003	30.08
8/3/1974	15.5	16/2/1987	17.82	3/8/1990	23.5	14/7/2003	31.21
11/3/1974	15.5	17/2/1987	17.77	10/8/1990	25.5	21/7/2003	31.67
12/3/1974	15.5	18/2/1987	17.44	17/8/1990	28.35	28/7/2003	29.98
13/3/1974	15.5	19/2/1987	17.47	24/8/1990	31.8	4/8/2003	31.8
14/3/1974	15.5	20/2/1987	17.82	31/8/1990	26.4	11/8/2003	31.91
15/3/1974	15.5	23/2/1987	17.15	7/9/1990	30.45	18/8/2003	30.81
18/3/1974	15.5	24/2/1987	16.74	14/9/1990	33.5	25/8/2003	31.43
19/3/1974	15.5	25/2/1987	16.42	21/9/1990	36.95	1/9/2003	31.76
20/3/1974	15.5	26/2/1987	16.97	28/9/1990	41.1	8/9/2003	28.85
21/3/1974	15.5	27/2/1987	16.45	5/10/1990	38.9	15/9/2003	28.15
22/3/1974	15.5	2/3/1987	16.43	12/10/1990	39.1	22/9/2003	26.97
25/3/1974	15.5	3/3/1987	17.4	19/10/1990	32.15	29/9/2003	28.35
26/3/1974	15.5	4/3/1987	17.4	26/10/1990	32.75	6/10/2003	30.4
27/3/1974	15.5	5/3/1987	18	2/11/1990	34.6	13/10/2003	31.91
28/3/1974	15.5	6/3/1987	18.13	9/11/1990	33.6	20/10/2003	30.37
29/3/1974	15.5	9/3/1987	18.13	16/11/1990	30.25	27/10/2003	29.95
1/4/1974	15.5	10/3/1987	18.27	23/11/1990	32.6	3/11/2003	28.81
2/4/1974	15.5	11/3/1987	18.32	30/11/1990	30.3	10/11/2003	31.01
3/4/1974	15.5	12/3/1987	18.41	7/12/1990	28.4	17/11/2003	31.75
4/4/1974	15.5	13/3/1987	18.39	14/12/1990	26.85	24/11/2003	29.99
5/4/1974	15.5	16/3/1987	18.6	21/12/1990	26.5	1/12/2003	29.89
8/4/1974	15.5	17/3/1987	18.93	28/12/1990	27.8	8/12/2003	32.08
9/4/1974	15.5	18/3/1987	18.74	4/1/1991	24.3	15/12/2003	33.17
10/4/1974	15.5	19/3/1987	18.61	11/1/1991	28.5	22/12/2003	31.71
11/4/1974	15.5	20/3/1987	18.69	18/1/1991	18.15	29/12/2003	32.51
12/4/1974	15.5	23/3/1987	18.59	25/1/1991	20.6	5/1/2004	33.71
15/4/1974	15.5	24/3/1987	18.59	1/2/1991	20.85	12/1/2004	34.92
16/4/1974	15.5	25/3/1987	18.47	8/2/1991	21.4	19/1/2004	35.16
17/4/1974	15.5	26/3/1987	18.63	15/2/1991	17.45	26/1/2004	34.41
18/4/1974	15.5	27/3/1987	18.65	22/2/1991	17.15	2/2/2004	34.87
19/4/1974	15.5	30/3/1987	18.66	1/3/1991	20	9/2/2004	32.91
22/4/1974	15.5	31/3/1987	18.81	8/3/1991	20.55	16/2/2004	34.51
23/4/1974	15.5	1/4/1987	18.77	15/3/1991	18.5	23/2/2004	35.75
24/4/1974	15.5	2/4/1987	18.89	22/3/1991	19.15	1/3/2004	36.85
25/4/1974	15.5	3/4/1987	18.67	29/3/1991	18	8/3/2004	36.48
26/4/1974	15.5	6/4/1987	18.7	5/4/1991	18.6	15/3/2004	37.47
29/4/1974	15.5	7/4/1987	18.68	12/4/1991	20.3	22/3/2004	37.12
30/4/1974	13	8/4/1987	18.67	19/4/1991	19.45	29/3/2004	35.41
1/5/1974	13	9/4/1987	18.63	26/4/1991	20	5/4/2004	34.29
2/5/1974	13	10/4/1987	18.25	3/5/1991	19.6	12/4/2004	37.79
3/5/1974	13	13/4/1987	18.07	10/5/1991	19.5	19/4/2004	37.46
6/5/1974	13	14/4/1987	18.09	17/5/1991	19.25	26/4/2004	36.98
7/5/1974	13	15/4/1987	18.45	24/5/1991	18.95	3/5/2004	38.26
8/5/1974	13	16/4/1987	18.58	31/5/1991	18.9	10/5/2004	38.9
9/5/1974	13	17/4/1987	18.58	7/6/1991	18.3	17/5/2004	41.53
10/5/1974	13	20/4/1987	18.66	14/6/1991	17.75	24/5/2004	42.03
13/5/1974	13	21/4/1987	18.96	21/6/1991	18.4	31/5/2004	39.9
14/5/1974	13	22/4/1987	19.02	28/6/1991	18.65	7/6/2004	38.72
15/5/1974	13	23/4/1987	19.02	5/7/1991	18.8	14/6/2004	37.58
16/5/1974	13	24/4/1987	19	12/7/1991	19.75	21/6/2004	37.69
17/5/1974	13	27/4/1987	18.82	19/7/1991	20.35	28/6/2004	36.25
20/5/1974	13	28/4/1987	18.72	26/7/1991	19.7	5/7/2004	38.37
21/5/1974	13	29/4/1987	18.66	2/8/1991	19.4	12/7/2004	39.3
22/5/1974	13	30/4/1987	18.75	9/8/1991	19.7	19/7/2004	41.55
23/5/1974	13	1/5/1987	18.84	16/8/1991	19.3	26/7/2004	41.45
24/5/1974	13	4/5/1987	18.92	23/8/1991	19.95	2/8/2004	43.83
27/5/1974	13	5/5/1987	19.17	30/8/1991	20.75	9/8/2004	44.86
28/5/1974	13	6/5/1987	19.21	6/9/1991	19.95	16/8/2004	46.02
29/5/1974	13	7/5/1987	19.07	13/9/1991	20.5	23/8/2004	46
30/5/1974	13	8/5/1987	19.27	20/9/1991	20.55	30/8/2004	42.32
31/5/1974	13	11/5/1987	19.42	27/9/1991	21.55	6/9/2004	43.94
3/6/1974	13	12/5/1987	19.37	4/10/1991	21.87	13/9/2004	43.86
4/6/1974	13	13/5/1987	19.39	11/10/1991	22.4	20/9/2004	46.33
5/6/1974	13	14/5/1987	19.56	18/10/1991	22.9	27/9/2004	49.56
6/6/1974	13	15/5/1987	19.83	25/10/1991	21.95	4/10/2004	49.85
7/6/1974	13	18/5/1987	19.9	1/11/1991	22.7	11/10/2004	53.65
10/6/1974	13	19/5/1987	19.97	8/11/1991	21.8	18/10/2004	53.59
11/6/1974	13	20/5/1987	19.75	15/11/1991	21.85	25/10/2004	55.52
12/6/1974	13	21/5/1987	19.95	22/11/1991	19.8	1/11/2004	50.1
13/6/1974	13	22/5/1987	19.67	29/11/1991	19.9	8/11/2004	49.1
14/6/1974	13	25/5/1987	19.67	6/12/1991	18.6	15/11/2004	46.95
17/6/1974	13	26/5/1987	19.34	13/12/1991	18.85	22/11/2004	48.48
18/6/1974	13	27/5/1987	19.38	20/12/1991	17.4	29/11/2004	49.71
19/6/1974	13	28/5/1987	19.28	27/12/1991	17.9	6/12/2004	42.96
20/6/1974	13	29/5/1987	19.36	3/1/1992	18.25	13/12/2004	41.06
21/6/1974	13	1/6/1987	19.54	10/1/1992	17.8	20/12/2004	45.57
24/6/1974	13	2/6/1987	19.69	17/1/1992	18.55	27/12/2004	41.26
25/6/1974	13	3/6/1987	19.86	24/1/1992	18.5	3/1/2005	42.16
26/6/1974	13	4/6/1987	19.74	31/1/1992	18.4	10/1/2005	45.31
27/6/1974	13	5/6/1987	19.79	7/2/1992	18.95	17/1/2005	48.41
28/6/1974	13	8/6/1987	19.93	14/2/1992	18.5	24/1/2005	48.61
1/7/1974	13	9/6/1987	19.83	21/2/1992	17.95	31/1/2005	48.25
2/7/1974	13	10/6/1987	19.82	28/2/1992	17.55	7/2/2005	45.35
3/7/1974	13	11/6/1987	19.85	6/3/1992	17.4	14/2/2005	47.5
4/7/1974	13	12/6/1987	19.92	13/3/1992	17.9	21/2/2005	48.45
5/7/1974	13	15/6/1987	20.06	20/3/1992	17.65	28/2/2005	51.75
8/7/1974	13	16/6/1987	20.27	27/3/1992	17.95	7/3/2005	53.9
9/7/1974	13	17/6/1987	20.4	3/4/1992	18.9	14/3/2005	54.9
10/7/1974	13	18/6/1987	20.49	10/4/1992	19.25	21/3/2005	56.7
11/7/1974	13	19/6/1987	20.64	17/4/1992	19.1	28/3/2005	54.06
12/7/1974	13	22/6/1987	20.49	24/4/1992	19	4/4/2005	56.86
15/7/1974	13	23/6/1987	19.94	1/5/1992	19.9	11/4/2005	53.71
16/7/1974	13	24/6/1987	20.13	8/5/1992	19.75	18/4/2005	50.52
17/7/1974	13	25/6/1987	20.15	15/5/1992	19.65	25/4/2005	53.16
18/7/1974	13	26/6/1987	20.34	22/5/1992	19.9	2/5/2005	50.94
19/7/1974	13	29/6/1987	20.38	29/5/1992	21	9/5/2005	52.04
22/7/1974	13	30/6/1987	20.21	5/6/1992	21.35	16/5/2005	48.64
23/7/1974	13	1/7/1987	20.46	12/6/1992	21.05	23/5/2005	48.68
24/7/1974	13	2/7/1987	20.61	19/6/1992	21.05	30/5/2005	51.65
25/7/1974	13	3/7/1987	20.61	26/6/1992	21.2	6/6/2005	54.46
26/7/1974	13	6/7/1987	20.91	3/7/1992	20.75	13/6/2005	55.47
29/7/1974	13	7/7/1987	20.76	10/7/1992	19.7	20/6/2005	59.19
30/7/1974	13	8/7/1987	20.93	17/7/1992	20.1	27/6/2005	60.54
31/7/1974	11.5	9/7/1987	21.32	24/7/1992	20.75	4/7/2005	59.11
1/8/1974	11.5	10/7/1987	21.34	31/7/1992	20.35	11/7/2005	59.23
2/8/1974	11.5	13/7/1987	21.38	7/8/1992	19.8	18/7/2005	57.12
5/8/1974	11.5	14/7/1987	21.64	14/8/1992	19.95	25/7/2005	58.16
6/8/1974	11.5	15/7/1987	22.22	21/8/1992	19.55	1/8/2005	61.51
7/8/1974	11.5	16/7/1987	22.44	28/8/1992	19.75	8/8/2005	63.92
8/8/1974	11.5	17/7/1987	22.44	4/9/1992	20.15	15/8/2005	66.21
9/8/1974	11.5	20/7/1987	22.22	11/9/1992	20.45	22/8/2005	65.46
12/8/1974	11.5	21/7/1987	21.75	18/9/1992	20.15	29/8/2005	67.41
13/8/1974	11.5	22/7/1987	21.72	25/9/1992	20.25	5/9/2005	66.91
14/8/1974	11.5	23/7/1987	21.22	2/10/1992	20.42	12/9/2005	63.29
15/8/1974	11.5	24/7/1987	20.57	9/10/1992	20.9	19/9/2005	67.21
16/8/1974	11.5	27/7/1987	20.5	16/10/1992	20.82	26/9/2005	65.98
19/8/1974	11.5	28/7/1987	21.35	23/10/1992	19.85	3/10/2005	65.36
20/8/1974	11.5	29/7/1987	21.49	30/10/1992	19.32	10/10/2005	60.71
21/8/1974	11.5	30/7/1987	21.46	6/11/1992	19.02	17/10/2005	64.26
22/8/1974	11.5	31/7/1987	21.43	13/11/1992	18.94	24/10/2005	60.63
23/8/1974	11.5	3/8/1987	22.21	20/11/1992	19.38	31/10/2005	59.8
26/8/1974	11.5	4/8/1987	21.82	27/11/1992	19.14	7/11/2005	59.4
27/8/1974	11.5	5/8/1987	21.36	4/12/1992	18.24	14/11/2005	57.6
28/8/1974	11.5	6/8/1987	21.16	11/12/1992	18.35	21/11/2005	57.75
29/8/1974	11.5	7/8/1987	21	18/12/1992	18.46	28/11/2005	57.36
30/8/1974	11.5	10/8/1987	20.69	25/12/1992	18.48	5/12/2005	59.91
2/9/1974	11.5	11/8/1987	21.07	1/1/1993	18.02	12/12/2005	61.36
3/9/1974	11.5	12/8/1987	20.95	8/1/1993	17.24	19/12/2005	57.31
4/9/1974	11.5	13/8/1987	20.76	15/1/1993	17.43	26/12/2005	58.2
5/9/1974	11.5	14/8/1987	20.52	22/1/1993	17.18	2/1/2006	61.06
6/9/1974	11.5	17/8/1987	19.85	29/1/1993	18.57	9/1/2006	63.56
9/9/1974	11.5	18/8/1987	19.83	5/2/1993	18.73	16/1/2006	63.86
10/9/1974	11.5	19/8/1987	19.7	12/2/1993	18.21	23/1/2006	68.06
11/9/1974	11.5	20/8/1987	19.46	19/2/1993	17.96	30/1/2006	68.36
12/9/1974	11.5	21/8/1987	19.2	26/2/1993	18.98	6/2/2006	65.11
13/9/1974	11.5	24/8/1987	19.17	5/3/1993	19.51	13/2/2006	61.26
16/9/1974	11.5	25/8/1987	19.3	12/3/1993	18.92	20/2/2006	59.76
17/9/1974	11.5	26/8/1987	19.49	19/3/1993	18.53	27/2/2006	61.01
18/9/1974	11.5	27/8/1987	19.69	26/3/1993	18.64	6/3/2006	62.46
19/9/1974	11.5	28/8/1987	19.44	2/4/1993	19.07	13/3/2006	61.81
20/9/1974	11.5	31/8/1987	19.75	9/4/1993	18.7	20/3/2006	60.31
23/9/1974	11.5	1/9/1987	19.6	16/4/1993	18.64	27/3/2006	63.75
24/9/1974	11.5	2/9/1987	19.61	23/4/1993	18.79	3/4/2006	66.07
25/9/1974	11.5	3/9/1987	19.47	30/4/1993	19.03	10/4/2006	68.29
26/9/1974	11.5	4/9/1987	19.33	7/5/1993	19.02	17/4/2006	70.3
27/9/1974	11.5	7/9/1987	19.33	14/5/1993	18.46	24/4/2006	70.19
30/9/1974	11.5	8/9/1987	18.99	21/5/1993	18.23	1/5/2006	73.75
1/10/1974	11.5	9/9/1987	19.42	28/5/1993	18.5	8/5/2006	69.75
2/10/1974	11.5	10/9/1987	19.71	4/6/1993	18.21	15/5/2006	69.25
3/10/1974	11.5	11/9/1987	19.41	11/6/1993	17.67	22/5/2006	69.23
4/10/1974	11.5	14/9/1987	19.63	18/6/1993	17.34	29/5/2006	71.35
7/10/1974	11.5	15/9/1987	19.66	25/6/1993	17.23	5/6/2006	72.5
8/10/1974	11.5	16/9/1987	19.71	2/7/1993	16.67	12/6/2006	70.28
9/10/1974	11.5	17/9/1987	19.57	9/7/1993	16.62	19/6/2006	69.21
10/10/1974	11.5	18/9/1987	19.57	16/7/1993	16.24	26/6/2006	71.63
11/10/1974	11.5	21/9/1987	19.76	23/7/1993	16.82	3/7/2006	73.85
14/10/1974	11.5	22/9/1987	19.35	30/7/1993	16.73	10/7/2006	73.5
15/10/1974	11.5	23/9/1987	19.65	6/8/1993	16.45	17/7/2006	75.7
16/10/1974	11.5	24/9/1987	19.6	13/8/1993	17.09	24/7/2006	74.29
17/10/1974	11.5	25/9/1987	19.47	20/8/1993	16.93	31/7/2006	74.56
18/10/1974	11.5	28/9/1987	19.47	27/8/1993	16.91	7/8/2006	77.05
21/10/1974	11.5	29/9/1987	19.57	3/9/1993	16.27	14/8/2006	73.33
22/10/1974	11.5	30/9/1987	19.61	10/9/1993	15.4	21/8/2006	72.45
23/10/1974	11.5	1/10/1987	19.61	17/9/1993	15.83	28/8/2006	70.47
24/10/1974	11.5	2/10/1987	19.88	24/9/1993	16.18	4/9/2006	69.24
25/10/1974	11.5	5/10/1987	19.8	1/10/1993	17.12	11/9/2006	65.42
28/10/1974	11.5	6/10/1987	19.32	8/10/1993	16.98	18/9/2006	63.84
29/10/1974	11.5	7/10/1987	19.67	15/10/1993	16.66	25/9/2006	60.74
30/10/1974	11.5	8/10/1987	19.76	22/10/1993	16.53	2/10/2006	60.96
31/10/1974	11.7	9/10/1987	19.66	29/10/1993	15.57	9/10/2006	59.93
1/11/1974	11.7	12/10/1987	19.66	5/11/1993	15.63	16/10/2006	59.91
4/11/1974	11.7	13/10/1987	19.65	12/11/1993	15.25	23/10/2006	56.74
5/11/1974	11.7	14/10/1987	19.78	19/11/1993	15.44	30/10/2006	58.41
6/11/1974	11.7	15/10/1987	19.77	26/11/1993	14.33	6/11/2006	60.11
7/11/1974	11.7	16/10/1987	20.23	3/12/1993	14.17	13/11/2006	58.59
8/11/1974	11.7	19/10/1987	19.79	10/12/1993	14.17	20/11/2006	56.42
11/11/1974	11.7	20/10/1987	19.79	17/12/1993	13.44	27/11/2006	60.3
12/11/1974	11.7	21/10/1987	19.92	24/12/1993	12.98	4/12/2006	62.39
13/11/1974	11.7	22/10/1987	20.18	31/12/1993	13.38	11/12/2006	61.26
14/11/1974	11.7	23/10/1987	20.17	7/1/1994	14.68	18/12/2006	62.19
15/11/1974	11.7	26/10/1987	19.99	14/1/1994	13.92	25/12/2006	61.81
18/11/1974	11.7	27/10/1987	20.14	21/1/1994	14.06	1/1/2007	60.85
19/11/1974	11.7	28/10/1987	20.09	28/1/1994	14.9	8/1/2007	56.08
20/11/1974	11.7	29/10/1987	19.92	4/2/1994	15.33	15/1/2007	52.96
21/11/1974	11.7	30/10/1987	19.96	11/2/1994	13.91	22/1/2007	51.11
22/11/1974	11.7	2/11/1987	19.63	18/2/1994	12.96	29/1/2007	54.01
25/11/1974	11.7	3/11/1987	19.39	25/2/1994	13.4	5/2/2007	58.69
26/11/1974	11.7	4/11/1987	19.08	4/3/1994	13.73	12/2/2007	57.76
27/11/1974	11.7	5/11/1987	19.01	11/3/1994	13.84	19/2/2007	59.38
28/11/1974	11.7	6/11/1987	18.72	18/3/1994	14.11	26/2/2007	61.41
29/11/1974	11.7	9/11/1987	18.65	25/3/1994	14.29	5/3/2007	60.05
2/12/1974	11.7	10/11/1987	18.97	1/4/1994	13.66	12/3/2007	58.94
3/12/1974	11.7	11/11/1987	18.91	8/4/1994	14.63	19/3/2007	56.65
4/12/1974	11.7	12/11/1987	18.93	15/4/1994	15.23	26/3/2007	61.77
5/12/1974	11.7	13/11/1987	18.88	22/4/1994	16.26	2/4/2007	66.03
6/12/1974	11.7	16/11/1987	18.68	29/4/1994	15.47	9/4/2007	61.51
9/12/1974	11.7	17/11/1987	18.27	6/5/1994	16.9	16/4/2007	63.63
10/12/1974	11.7	18/11/1987	18.62	13/5/1994	16.52	23/4/2007	65.33
11/12/1974	11.7	19/11/1987	18.54	20/5/1994	16.66	30/4/2007	65.78
12/12/1974	11.7	20/11/1987	18.87	27/5/1994	16.45	7/5/2007	61.48
13/12/1974	11.7	23/11/1987	19.3	3/6/1994	16.37	14/5/2007	62.55
16/12/1974	11.7	24/11/1987	18.73	10/6/1994	16.4	21/5/2007	66.25
17/12/1974	11.7	25/11/1987	18.63	17/6/1994	17.57	28/5/2007	64.59
18/12/1974	11.7	26/11/1987	18.63	24/6/1994	18.02	4/6/2007	66.17
19/12/1974	11.7	27/11/1987	18.63	1/7/1994	18.38	11/6/2007	65.93
20/12/1974	11.7	30/11/1987	18.52	8/7/1994	17.88	18/6/2007	69.06
23/12/1974	11.7	1/12/1987	18.43	15/7/1994	18.27	25/6/2007	68.83
24/12/1974	11.7	2/12/1987	18.58	22/7/1994	18.09	2/7/2007	71.11
25/12/1974	11.7	3/12/1987	18.87	29/7/1994	18.81	9/7/2007	72.14
26/12/1974	11.7	4/12/1987	18.67	5/8/1994	17.79	16/7/2007	74.11
27/12/1974	11.7	7/12/1987	18.29	12/8/1994	16.99	23/7/2007	74.65
30/12/1974	11.7	8/12/1987	18.05	19/8/1994	16.11	30/7/2007	76.82
31/12/1974	11.7	9/12/1987	18.52	26/8/1994	15.83	6/8/2007	72.03
1/1/1975	11.7	10/12/1987	18.51	2/9/1994	16.03	13/8/2007	71.6
2/1/1975	11.7	11/12/1987	18.31	9/9/1994	15.96	20/8/2007	71.12
3/1/1975	11.7	14/12/1987	17.47	16/9/1994	15.55	27/8/2007	71.98
6/1/1975	11.7	15/12/1987	16.74	23/9/1994	16.68	3/9/2007	73.98
7/1/1975	11.7	16/12/1987	15.97	30/9/1994	17.1	10/9/2007	77.53
8/1/1975	11.7	17/12/1987	15.96	7/10/1994	16.86	17/9/2007	80.55
9/1/1975	11.7	18/12/1987	15.56	14/10/1994	15.76	24/9/2007	82.51
10/1/1975	11.7	21/12/1987	15.12	21/10/1994	16.44	1/10/2007	80.31
13/1/1975	11.7	22/12/1987	16.6	28/10/1994	17.3	8/10/2007	78.97
14/1/1975	11.7	23/12/1987	16.64	4/11/1994	18	15/10/2007	86.19
15/1/1975	11.7	24/12/1987	16.53	11/11/1994	17.22	22/10/2007	87.6
16/1/1975	11.7	25/12/1987	16.53	18/11/1994	17.27	29/10/2007	93.45
17/1/1975	11.7	28/12/1987	16.46	25/11/1994	17.5	5/11/2007	94.06
20/1/1975	11.7	29/12/1987	16.95	2/12/1994	16.25	12/11/2007	94.4
21/1/1975	11.7	30/12/1987	16.96	9/12/1994	16.25	19/11/2007	95.75
22/1/1975	11.7	31/12/1987	16.73	16/12/1994	15.82	26/11/2007	97.66
23/1/1975	11.7	1/1/1988	16.73	23/12/1994	15.71	3/12/2007	89.29
24/1/1975	11.7	4/1/1988	17.76	30/12/1994	16.22	10/12/2007	87.72
27/1/1975	11.7	5/1/1988	17.88	6/1/1995	16.44	17/12/2007	90.69
28/1/1975	11.7	6/1/1988	17.72	13/1/1995	16.38	24/12/2007	94
29/1/1975	11.7	7/1/1988	17.29	20/1/1995	17.2	31/12/2007	95.95
30/1/1975	11.7	8/1/1988	17.32	27/1/1995	16.48	7/1/2008	95.08
31/1/1975	11.5	11/1/1988	16.63	3/2/1995	17.3	14/1/2008	94.23
3/2/1975	11.5	12/1/1988	16.75	10/2/1995	17	21/1/2008	90.55
4/2/1975	11.5	13/1/1988	16.55	17/2/1995	17.71	28/1/2008	90.99
5/2/1975	11.5	14/1/1988	17.09	24/2/1995	17.65	4/2/2008	90.07
6/2/1975	11.5	15/1/1988	16.91	3/3/1995	17.36	11/2/2008	93.56
7/2/1975	11.5	18/1/1988	17.27	10/3/1995	17.15	18/2/2008	95.57
10/2/1975	11.5	19/1/1988	17.29	17/3/1995	16.71	25/2/2008	99.4
11/2/1975	11.5	20/1/1988	17.2	24/3/1995	17.56	3/3/2008	102.42
12/2/1975	11.5	21/1/1988	17.2	31/3/1995	17.88	10/3/2008	107.9
13/2/1975	11.5	22/1/1988	16.98	7/4/1995	18.58	17/3/2008	105.74
14/2/1975	11.5	25/1/1988	17.1	14/4/1995	18.03	24/3/2008	101.7
17/2/1975	11.5	26/1/1988	16.96	21/4/1995	19.51	31/3/2008	101.54
18/2/1975	11.5	27/1/1988	16.63	28/4/1995	19.88	7/4/2008	108.91
19/2/1975	11.5	28/1/1988	16.93	5/5/1995	19.31	14/4/2008	111.71
20/2/1975	11.5	29/1/1988	16.96	12/5/1995	18.54	21/4/2008	117.48
21/2/1975	11.5	1/2/1988	16.82	19/5/1995	18.73	28/4/2008	118.78
24/2/1975	11.5	2/2/1988	16.91	26/5/1995	17.52	5/5/2008	119.94
25/2/1975	11.5	3/2/1988	17.11	2/6/1995	18.2	12/5/2008	124.02
26/2/1975	11.5	4/2/1988	17.16	9/6/1995	17.85	19/5/2008	127.15
27/2/1975	11.5	5/2/1988	17.34	16/6/1995	17.57	26/5/2008	131.58
28/2/1975	11.5	8/2/1988	17.7	23/6/1995	16.55	2/6/2008	127.75
3/3/1975	11.5	9/2/1988	17.38	30/6/1995	16.56	9/6/2008	134.44
4/3/1975	11.5	10/2/1988	17.11	7/7/1995	16.21	16/6/2008	134.52
5/3/1975	11.5	11/2/1988	17.16	14/7/1995	16.06	23/6/2008	135.98
6/3/1975	11.5	12/2/1988	16.84	21/7/1995	15.67	30/6/2008	139.96
7/3/1975	11.5	15/2/1988	16.84	28/7/1995	16.05	7/7/2008	141.38
10/3/1975	11.5	16/2/1988	16.79	4/8/1995	16.36	14/7/2008	145.16
11/3/1975	11.5	17/2/1988	16.61	11/8/1995	16.37	21/7/2008	131.43
12/3/1975	11.5	18/2/1988	16.49	18/8/1995	16.11	28/7/2008	124.72
13/3/1975	11.5	19/2/1988	16.72	25/8/1995	16.28	4/8/2008	121.45
14/3/1975	11.5	22/2/1988	16.63	1/9/1995	16.54	11/8/2008	114.44
17/3/1975	11.5	23/2/1988	16.79	8/9/1995	16.81	18/8/2008	113.14
18/3/1975	11.5	24/2/1988	16.57	15/9/1995	17.15	25/8/2008	114.85
19/3/1975	11.5	25/2/1988	15.85	22/9/1995	16.12	1/9/2008	115.55
20/3/1975	11.5	26/2/1988	15.76	29/9/1995	16.47	8/9/2008	106.35
21/3/1975	11.5	29/2/1988	15.97	6/10/1995	15.92	15/9/2008	95.52
24/3/1975	11.5	1/3/1988	15.56	13/10/1995	16.22	22/9/2008	122.61
25/3/1975	11.5	2/3/1988	15.68	20/10/1995	16.04	29/9/2008	96.29
26/3/1975	11.5	3/3/1988	15.35	27/10/1995	16.47	6/10/2008	88.15
27/3/1975	11.5	4/3/1988	15.63	3/11/1995	16.87	13/10/2008	81.17
28/3/1975	11.5	7/3/1988	15.34	10/11/1995	16.8	20/10/2008	74.11
31/3/1975	11.5	8/3/1988	15.57	17/11/1995	17.12	27/10/2008	62.02
1/4/1975	11.5	9/3/1988	15.51	24/11/1995	16.9	3/11/2008	63.96
2/4/1975	11.5	10/3/1988	16.03	1/12/1995	17.44	10/11/2008	62.19
3/4/1975	11.5	11/3/1988	16.2	8/12/1995	17.89	17/11/2008	55.14
4/4/1975	11.5	14/3/1988	15.56	15/12/1995	18.37	24/11/2008	53.63
7/4/1975	11.5	15/3/1988	15.8	22/12/1995	18.61	1/12/2008	49.34
8/4/1975	11.5	16/3/1988	16.02	29/12/1995	19.1	8/12/2008	43.69
9/4/1975	11.5	17/3/1988	16.38	5/1/1996	20.11	15/12/2008	44.61
10/4/1975	11.5	18/3/1988	16.6	12/1/1996	17.48	22/12/2008	31.1
11/4/1975	11.5	21/3/1988	16.51	19/1/1996	17.77	29/12/2008	39.89
14/4/1975	11.5	22/3/1988	16.01	26/1/1996	16.75	5/1/2009	48.61
15/4/1975	11.5	23/3/1988	16.58	2/2/1996	17.1	12/1/2009	37.65
16/4/1975	11.5	24/3/1988	16.72	9/2/1996	17.25	19/1/2009	35.38
17/4/1975	11.5	25/3/1988	17.06	16/2/1996	17.69	26/1/2009	46.5
18/4/1975	11.5	28/3/1988	17.05	23/2/1996	18.22	2/2/2009	41.35
21/4/1975	11.5	29/3/1988	17.08	1/3/1996	18.73	9/2/2009	39.58
22/4/1975	11.5	30/3/1988	17.06	8/3/1996	19.04	16/2/2009	37.63
23/4/1975	11.5	31/3/1988	17.08	15/3/1996	19.17	23/2/2009	37.66
24/4/1975	11.5	1/4/1988	17.08	22/3/1996	21.16	2/3/2009	40.07
25/4/1975	11.5	4/4/1988	16.99	29/3/1996	20.72	9/3/2009	47.01
28/4/1975	11.5	5/4/1988	16.71	5/4/1996	21.72	16/3/2009	47.33
29/4/1975	11.5	6/4/1988	16.79	12/4/1996	21.69	23/3/2009	53.05
30/4/1975	11.4	7/4/1988	17.04	19/4/1996	19.4	30/3/2009	48.49
1/5/1975	11.4	8/4/1988	16.86	26/4/1996	20.7	6/4/2009	51.1
2/5/1975	11.4	11/4/1988	17.86	3/5/1996	19.94	13/4/2009	50.22
5/5/1975	11.4	12/4/1988	18.06	10/5/1996	19.7	20/4/2009	45.82
6/5/1975	11.4	13/4/1988	18.12	17/5/1996	18.02	27/4/2009	49.29
7/5/1975	11.4	14/4/1988	18.4	24/5/1996	19.76	4/5/2009	54.45
8/5/1975	11.4	15/4/1988	18.32	31/5/1996	18.16	11/5/2009	57.79
9/5/1975	11.4	18/4/1988	18.49	7/6/1996	18.67	18/5/2009	58.99
12/5/1975	11.4	19/4/1988	17.92	14/6/1996	18.27	25/5/2009	61.15
13/5/1975	11.4	20/4/1988	17.92	21/6/1996	18.48	1/6/2009	68.59
14/5/1975	11.4	21/4/1988	18.33	28/6/1996	19.24	8/6/2009	68.05
15/5/1975	11.4	22/4/1988	18.13	5/7/1996	20.34	15/6/2009	70.55
16/5/1975	11.4	25/4/1988	18.36	12/7/1996	20.04	22/6/2009	67.09
19/5/1975	11.4	26/4/1988	18.53	19/7/1996	19.59	29/6/2009	71.47
20/5/1975	11.4	27/4/1988	18.32	26/7/1996	19.03	6/7/2009	64.06
21/5/1975	11.4	28/4/1988	17.9	2/8/1996	19.88	13/7/2009	59.69
22/5/1975	11.4	29/4/1988	18.09	9/8/1996	20.39	20/7/2009	63.93
23/5/1975	11.4	2/5/1988	17.11	16/8/1996	21.3	27/7/2009	68.34
26/5/1975	11.4	3/5/1988	17.29	23/8/1996	20.98	3/8/2009	71.59
27/5/1975	11.4	4/5/1988	17.22	30/8/1996	21.38	10/8/2009	70.59
28/5/1975	11.4	5/5/1988	17.4	6/9/1996	23.16	17/8/2009	66.72
29/5/1975	11.4	6/5/1988	17.63	13/9/1996	23.76	24/8/2009	73.68
30/5/1975	11.4	9/5/1988	17.55	20/9/1996	22.37	31/8/2009	69.97
2/6/1975	11.4	10/5/1988	17.5	27/9/1996	23.92	7/9/2009	67.95
3/6/1975	11.4	11/5/1988	17.48	4/10/1996	24.13	14/9/2009	68.86
4/6/1975	11.4	12/5/1988	17.48	11/10/1996	24.24	21/9/2009	69.74
5/6/1975	11.4	13/5/1988	17.52	18/10/1996	25.09	28/9/2009	66.69
6/6/1975	11.4	16/5/1988	17.69	25/10/1996	24.54	5/10/2009	70.26
9/6/1975	11.4	17/5/1988	17.72	1/11/1996	22.38	12/10/2009	73.24
10/6/1975	11.4	18/5/1988	17.39	8/11/1996	23.14	19/10/2009	79.47
11/6/1975	11.4	19/5/1988	17.42	15/11/1996	23.5	26/10/2009	78.61
12/6/1975	11.4	20/5/1988	17.41	22/11/1996	23.73	2/11/2009	78.08
13/6/1975	11.4	23/5/1988	17.01	29/11/1996	23.61	9/11/2009	79.44
16/6/1975	11.4	24/5/1988	17.04	6/12/1996	25.33	16/11/2009	78.91
17/6/1975	11.4	25/5/1988	17.38	13/12/1996	23.33	23/11/2009	76.49
18/6/1975	11.4	26/5/1988	17.53	20/12/1996	23.96	30/11/2009	77.19
19/6/1975	11.4	27/5/1988	17.44	27/12/1996	23.78	7/12/2009	73.89
20/6/1975	11.4	30/5/1988	17.44	3/1/1997	24.38	14/12/2009	69.48
23/6/1975	11.4	31/5/1988	17.53	10/1/1997	24.41	21/12/2009	72.71
24/6/1975	11.4	1/6/1988	17.6	17/1/1997	22.79	28/12/2009	78.67
25/6/1975	11.4	2/6/1988	17.66	24/1/1997	22.64	4/1/2010	81.52
26/6/1975	11.4	3/6/1988	17.51	31/1/1997	23.23	11/1/2010	82.54
27/6/1975	11.4	6/6/1988	17.28	7/2/1997	21.28	18/1/2010	77.96
30/6/1975	11.4	7/6/1988	17.32	14/2/1997	20.7	25/1/2010	74.9
1/7/1975	11.4	8/6/1988	17.34	21/2/1997	20.25	1/2/2010	74.41
2/7/1975	11.4	9/6/1988	17.08	28/2/1997	19.2	8/2/2010	71.87
3/7/1975	11.4	10/6/1988	16.69	7/3/1997	19.93	15/2/2010	74.11
4/7/1975	11.4	13/6/1988	16.43	14/3/1997	19.99	22/2/2010	80.04
7/7/1975	11.4	14/6/1988	16.84	21/3/1997	19.93	1/3/2010	78.71
8/7/1975	11.4	15/6/1988	16.55	28/3/1997	19.12	8/3/2010	81.85
9/7/1975	11.4	16/6/1988	16.61	4/4/1997	17.04	15/3/2010	79.79
10/7/1975	11.4	17/6/1988	16.42	11/4/1997	17.48	22/3/2010	81.26
11/7/1975	11.4	20/6/1988	16.01	18/4/1997	17.75	29/3/2010	81.92
14/7/1975	11.4	21/6/1988	15.81	25/4/1997	18.11	5/4/2010	86.36
15/7/1975	11.4	22/6/1988	16.02	2/5/1997	17.85	12/4/2010	84.07
16/7/1975	11.4	23/6/1988	15.86	9/5/1997	18.92	19/4/2010	81.52
17/7/1975	11.4	24/6/1988	16.03	16/5/1997	20.36	26/4/2010	84.2
18/7/1975	11.4	27/6/1988	15.86	23/5/1997	20.06	3/5/2010	86.19
21/7/1975	11.4	28/6/1988	16	30/5/1997	19.34	10/5/2010	76.89
22/7/1975	11.4	29/6/1988	15.37	6/6/1997	17.31	17/5/2010	70.08
23/7/1975	11.4	30/6/1988	15.19	13/6/1997	17.49	24/5/2010	68.23
24/7/1975	11.4	1/7/1988	14.91	20/6/1997	17.48	31/5/2010	74
25/7/1975	11.4	4/7/1988	14.91	27/6/1997	18.07	7/6/2010	71.55
28/7/1975	11.4	5/7/1988	15.11	4/7/1997	18.27	14/6/2010	74.99
29/7/1975	11.4	6/7/1988	15.43	11/7/1997	18.35	21/6/2010	77.84
30/7/1975	11.4	7/7/1988	15.82	18/7/1997	18.27	28/6/2010	78.26
31/7/1975	11.5	8/7/1988	15.42	25/7/1997	18.72	5/7/2010	72.06
1/8/1975	11.5	11/7/1988	14.55	1/8/1997	19.39	12/7/2010	74.93
4/8/1975	11.5	12/7/1988	14.61	8/8/1997	18.71	19/7/2010	76.53
5/8/1975	11.5	13/7/1988	14.35	15/8/1997	18.9	26/7/2010	78.93
6/8/1975	11.5	14/7/1988	14.83	22/8/1997	18.41	2/8/2010	81.25
7/8/1975	11.5	15/7/1988	14.85	29/8/1997	18.37	9/8/2010	81.46
8/8/1975	11.5	18/7/1988	15.83	5/9/1997	18.43	16/8/2010	75.17
11/8/1975	11.5	19/7/1988	15.15	12/9/1997	18.25	23/8/2010	72.71
12/8/1975	11.5	20/7/1988	15.76	19/9/1997	18.39	30/8/2010	74.69
13/8/1975	11.5	21/7/1988	16.28	26/9/1997	19.53	6/9/2010	74.52
14/8/1975	11.5	22/7/1988	16.27	3/10/1997	21.83	13/9/2010	77.17
15/8/1975	11.5	25/7/1988	16.08	10/10/1997	20.88	20/9/2010	74.81
18/8/1975	11.5	26/7/1988	15.98	17/10/1997	19.63	27/9/2010	76.51
19/8/1975	11.5	27/7/1988	16.17	24/10/1997	19.73	4/10/2010	81.43
20/8/1975	11.5	28/7/1988	16.08	31/10/1997	19.8	11/10/2010	82.18
21/8/1975	11.5	29/7/1988	16.36	7/11/1997	19.57	18/10/2010	83.06
22/8/1975	11.5	1/8/1988	16.06	14/11/1997	20.21	25/10/2010	82
25/8/1975	11.5	2/8/1988	15.57	21/11/1997	19.09	1/11/2010	82.94
26/8/1975	11.5	3/8/1988	15.19	28/11/1997	19.08	8/11/2010	87.07
27/8/1975	11.5	4/8/1988	15.11	5/12/1997	17.97	15/11/2010	84.88
28/8/1975	11.5	5/8/1988	15.3	12/12/1997	17.4	22/11/2010	81.24
29/8/1975	11.5	8/8/1988	15.83	19/12/1997	17.6	29/11/2010	85.73
1/9/1975	11.5	9/8/1988	15.55	26/12/1997	17.39	6/12/2010	89.33
2/9/1975	11.5	10/8/1988	15.65	2/1/1998	16.12	13/12/2010	88.62
3/9/1975	11.5	11/8/1988	15.75	9/1/1998	15.16	20/12/2010	88.68
4/9/1975	11.5	12/8/1988	15.53	16/1/1998	15.58	27/12/2010	90.99
5/9/1975	11.5	15/8/1988	15.58	23/1/1998	14.76	3/1/2011	91.59
8/9/1975	11.5	16/8/1988	15.5	30/1/1998	15.83	10/1/2011	89.24
9/9/1975	11.5	17/8/1988	15.45	6/2/1998	15.26	17/1/2011	91.53
10/9/1975	11.5	18/8/1988	15.58	13/2/1998	14.36	24/1/2011	86.74
11/9/1975	11.5	19/8/1988	15.76	20/2/1998	14.12	31/1/2011	90.99
12/9/1975	11.5	22/8/1988	15.74	27/2/1998	13.74	7/2/2011	86.3
15/9/1975	11.5	23/8/1988	15.7	6/3/1998	13.18	14/2/2011	83.66
16/9/1975	11.5	24/8/1988	15.54	13/3/1998	12.79	21/2/2011	85.03
17/9/1975	11.5	25/8/1988	15.33	20/3/1998	13.04	28/2/2011	97.1
18/9/1975	11.5	26/8/1988	15.34	27/3/1998	15.17	7/3/2011	105.37
19/9/1975	11.5	29/8/1988	15.24	3/4/1998	14.1	14/3/2011	101.2
22/9/1975	11.5	30/8/1988	15.39	10/4/1998	13.68	21/3/2011	102.36
23/9/1975	11.5	31/8/1988	15.19	17/4/1998	13.91	28/3/2011	103.54
24/9/1975	11.5	1/9/1988	15.04	24/4/1998	13.58	4/4/2011	108.14
25/9/1975	11.5	2/9/1988	14.79	1/5/1998	14.88	11/4/2011	109.5
26/9/1975	11.5	5/9/1988	14.79	8/5/1998	14.44	18/4/2011	106.7
29/9/1975	11.5	6/9/1988	14.25	15/5/1998	14.74	25/4/2011	111.68
30/9/1975	11.5	7/9/1988	14.28	22/5/1998	14.33	2/5/2011	113.03
1/10/1975	11.5	8/9/1988	14.51	29/5/1998	14.41	9/5/2011	100.32
2/10/1975	11.5	9/9/1988	14.13	5/6/1998	14.78	16/5/2011	96.91
3/10/1975	11.5	12/9/1988	14.48	12/6/1998	12.79	23/5/2011	97.06
6/10/1975	11.5	13/9/1988	14.55	19/6/1998	12.11	30/5/2011	100.58
7/10/1975	11.5	14/9/1988	15.38	26/6/1998	12.29	6/6/2011	99.07
8/10/1975	11.5	15/9/1988	14.86	3/7/1998	12.68	13/6/2011	97.2
9/10/1975	11.5	16/9/1988	14.49	10/7/1998	12.21	20/6/2011	93.23
10/10/1975	11.5	19/9/1988	14.71	17/7/1998	12.52	27/6/2011	90.65
13/10/1975	11.5	20/9/1988	15.07	24/7/1998	12.48	4/7/2011	94.81
14/10/1975	11.5	21/9/1988	15.18	31/7/1998	12.66	11/7/2011	95.16
15/10/1975	11.5	22/9/1988	15.25	7/8/1998	12.28	18/7/2011	95.94
16/10/1975	11.5	23/9/1988	14.25	14/8/1998	12.15	25/7/2011	98.97
17/10/1975	11.5	26/9/1988	14.16	21/8/1998	12.21	1/8/2011	94.98
20/10/1975	11.5	27/9/1988	14.22	28/8/1998	12.08	8/8/2011	81.27
21/10/1975	11.5	28/9/1988	14.07	4/9/1998	13.27	15/8/2011	87.88
22/10/1975	11.5	29/9/1988	13.9	11/9/1998	12.75	22/8/2011	84.42
23/10/1975	11.5	30/9/1988	13.32	18/9/1998	14.15	29/8/2011	87.27
24/10/1975	11.5	3/10/1988	13.03	25/9/1998	14.57	5/9/2011	84.63
27/10/1975	11.5	4/10/1988	13.03	2/10/1998	14.47	12/9/2011	88.19
28/10/1975	11.5	5/10/1988	12.57	9/10/1998	13.09	19/9/2011	85.7
29/10/1975	11.5	6/10/1988	12.61	16/10/1998	12.75	26/9/2011	79.97
30/10/1975	11.5	7/10/1988	12.98	23/10/1998	12.31	3/10/2011	77.34
31/10/1975	11.6	10/10/1988	13.58	30/10/1998	12.4	10/10/2011	85.14
3/11/1975	11.6	11/10/1988	13.63	6/11/1998	11.74	17/10/2011	86.38
4/11/1975	11.6	12/10/1988	14.02	13/11/1998	12.08	24/10/2011	91.12
5/11/1975	11.6	13/10/1988	14.25	20/11/1998	11.29	31/10/2011	93.19
6/11/1975	11.6	14/10/1988	14.89	27/11/1998	11.26	7/11/2011	95.52
7/11/1975	11.6	17/10/1988	15.16	4/12/1998	10.01	14/11/2011	98.14
10/11/1975	11.6	18/10/1988	14.63	11/12/1998	9.73	21/11/2011	96.73
11/11/1975	11.6	19/10/1988	15.32	18/12/1998	10.01	28/11/2011	98.21
12/11/1975	11.6	20/10/1988	14.44	25/12/1998	10.28	5/12/2011	100.99
13/11/1975	11.6	21/10/1988	14.22	1/1/1999	10.48	12/12/2011	97.77
14/11/1975	11.6	24/10/1988	12.93	8/1/1999	12.03	19/12/2011	93.88
17/11/1975	11.6	25/10/1988	13.36	15/1/1999	10.99	26/12/2011	99.61
18/11/1975	11.6	26/10/1988	13.45	22/1/1999	11.38	2/1/2012	98.83
19/11/1975	11.6	27/10/1988	13.67	29/1/1999	11.53	9/1/2012	101.31
20/11/1975	11.6	28/10/1988	13.78	5/2/1999	10.34	16/1/2012	98.69
21/11/1975	11.6	31/10/1988	13.54	12/2/1999	10.3	23/1/2012	99.47
24/11/1975	11.6	1/11/1988	13.52	19/2/1999	10.23	30/1/2012	98.75
25/11/1975	11.6	2/11/1988	13.77	26/2/1999	10.65	6/2/2012	96.89
26/11/1975	11.6	3/11/1988	13.89	5/3/1999	11.43	13/2/2012	100.39
27/11/1975	11.6	4/11/1988	14.04	12/3/1999	12.58	20/2/2012	103.27
28/11/1975	11.6	7/11/1988	14.08	19/3/1999	13.6	27/2/2012	108.49
1/12/1975	11.6	8/11/1988	13.7	26/3/1999	14.54	5/3/2012	106.7
2/12/1975	11.6	9/11/1988	13.88	2/4/1999	14.69	12/3/2012	106.34
3/12/1975	11.6	10/11/1988	13.99	9/4/1999	14.78	19/3/2012	108.09
4/12/1975	11.6	11/11/1988	13.99	16/4/1999	15.91	26/3/2012	107.07
5/12/1975	11.6	14/11/1988	14.24	23/4/1999	16.18	2/4/2012	105.25
8/12/1975	11.6	15/11/1988	14.02	30/4/1999	16.79	9/4/2012	102.45
9/12/1975	11.6	16/11/1988	13.68	7/5/1999	16.17	16/4/2012	102.92
10/12/1975	11.6	17/11/1988	13.3	14/5/1999	15.89	23/4/2012	102.68
11/12/1975	11.6	18/11/1988	13.46	21/5/1999	15.58	30/4/2012	104.89
12/12/1975	11.6	21/11/1988	13.72	28/5/1999	14.9	7/5/2012	97.86
15/12/1975	11.6	22/11/1988	14.78	4/6/1999	15.55	14/5/2012	94.75
16/12/1975	11.6	23/11/1988	14.1	11/6/1999	16.61	21/5/2012	92.57
17/12/1975	11.6	24/11/1988	14.1	18/6/1999	16.41	28/5/2012	90.64
18/12/1975	11.6	25/11/1988	15.42	25/6/1999	16.5	4/6/2012	83.95
19/12/1975	11.6	28/11/1988	14.93	2/7/1999	17.97	11/6/2012	82.58
22/12/1975	11.6	29/11/1988	14.99	9/7/1999	18.81	18/6/2012	83.26
23/12/1975	11.6	30/11/1988	15.41	16/7/1999	19.73	25/6/2012	78.76
24/12/1975	11.6	1/12/1988	15.63	23/7/1999	19.91	2/7/2012	83.72
25/12/1975	11.6	2/12/1988	15.68	30/7/1999	19.58	9/7/2012	85.93
26/12/1975	11.6	5/12/1988	15.35	6/8/1999	20.32	16/7/2012	88.41
29/12/1975	11.6	6/12/1988	15.5	13/8/1999	20.83	23/7/2012	87.77
30/12/1975	11.6	7/12/1988	15.79	20/8/1999	21.11	30/7/2012	89.8
31/12/1975	11.6	8/12/1988	15.47	27/8/1999	20.85	6/8/2012	92.3
1/1/1976	11.6	9/12/1988	15.9	3/9/1999	21.32	13/8/2012	92.76
2/1/1976	11.6	12/12/1988	16.08	10/9/1999	23.24	20/8/2012	96.03
5/1/1976	11.6	13/12/1988	15.93	17/9/1999	23.52	27/8/2012	95.54
6/1/1976	11.6	14/12/1988	16.33	24/9/1999	24.77	3/9/2012	97.04
7/1/1976	11.6	15/12/1988	16.38	1/10/1999	24.03	10/9/2012	96.52
8/1/1976	11.6	16/12/1988	16.81	8/10/1999	20.69	17/9/2012	96.51
9/1/1976	11.6	19/12/1988	16.23	15/10/1999	22.39	24/9/2012	91.68
12/1/1976	11.6	20/12/1988	17.68	22/10/1999	22.89	1/10/2012	92.44
13/1/1976	11.6	21/12/1988	17.26	29/10/1999	21.63	8/10/2012	89.43
14/1/1976	11.6	22/12/1988	17.35	5/11/1999	23.18	15/10/2012	91.84
15/1/1976	11.6	23/12/1988	16.63	12/11/1999	24.64	22/10/2012	88.3
16/1/1976	11.6	26/12/1988	16.63	19/11/1999	25.93	29/10/2012	85.52
19/1/1976	11.6	27/12/1988	16.97	26/11/1999	26.85	5/11/2012	85.64
20/1/1976	11.6	28/12/1988	17.03	3/12/1999	26.17	12/11/2012	85.56
21/1/1976	11.6	29/12/1988	16.8	10/12/1999	24.65	19/11/2012	89.05
22/1/1976	11.6	30/12/1988	17.11	17/12/1999	26.45	26/11/2012	87.28
23/1/1976	11.6	2/1/1989	17.11	24/12/1999	25.73	3/12/2012	88.69
26/1/1976	11.6	3/1/1989	17.38	31/12/1999	25.73	10/12/2012	85.14
27/1/1976	11.6	4/1/1989	16.99	7/1/2000	23.02	17/12/2012	86.71
28/1/1976	11.6	5/1/1989	17.44	14/1/2000	26.25	24/12/2012	88.29
29/1/1976	11.6	6/1/1989	17.55	21/1/2000	27.3	31/12/2012	91.83
30/1/1976	12.9	9/1/1989	17.74	28/1/2000	26.67	7/1/2013	93.2
2/2/1976	12.9	10/1/1989	17.8	4/2/2000	28.13	14/1/2013	94.27
3/2/1976	12.9	11/1/1989	18.15	11/2/2000	27.73	21/1/2013	95.61
4/2/1976	12.9	12/1/1989	18.11	18/2/2000	27.77	28/1/2013	95.95
5/2/1976	12.9	13/1/1989	18.49	25/2/2000	28.64	4/2/2013	96.21
6/2/1976	12.9	16/1/1989	18.88	3/3/2000	29.93	11/2/2013	97.01
9/2/1976	12.9	17/1/1989	19.02	10/3/2000	29.44	18/2/2013	95.95
10/2/1976	12.9	18/1/1989	19.2	17/3/2000	27.21	25/2/2013	92.74
11/2/1976	12.9	19/1/1989	19.28	24/3/2000	25.67	4/3/2013	90.13
12/2/1976	12.9	20/1/1989	18.84	31/3/2000	24.84	11/3/2013	92.07
13/2/1976	12.9	23/1/1989	17.66	7/4/2000	22.2	18/3/2013	93.71
16/2/1976	12.9	24/1/1989	17.95	14/4/2000	22.54	25/3/2013	94.55
17/2/1976	12.9	25/1/1989	18.23	21/4/2000	23.92	1/4/2013	97.1
18/2/1976	12.9	26/1/1989	17.67	28/4/2000	24.1	8/4/2013	93.36
19/2/1976	12.9	27/1/1989	17.74	5/5/2000	25.84	15/4/2013	88.75
20/2/1976	12.9	30/1/1989	17.31	12/5/2000	28.15	22/4/2013	88.81
23/2/1976	12.9	31/1/1989	17	19/5/2000	29.23	29/4/2013	94.09
24/2/1976	12.9	1/2/1989	17.49	26/5/2000	29.44	6/5/2013	95.8
25/2/1976	12.9	2/2/1989	17.71	2/6/2000	29.62	13/5/2013	94.76
26/2/1976	12.9	3/2/1989	17.5	9/6/2000	29.56	20/5/2013	96.29
27/2/1976	12.9	6/2/1989	17.38	16/6/2000	29.54	27/5/2013	93.84
1/3/1976	12.9	7/2/1989	17.54	23/6/2000	31.63	3/6/2013	93.41
2/3/1976	12.9	8/2/1989	17.49	30/6/2000	32.14	10/6/2013	95.82
3/3/1976	12.9	9/2/1989	17.41	7/7/2000	30.94	17/6/2013	97.86
4/3/1976	12.9	10/2/1989	17.11	14/7/2000	29.75	24/6/2013	95.07
5/3/1976	12.9	13/2/1989	17.6	21/7/2000	27.04	1/7/2013	97.94
8/3/1976	12.9	14/2/1989	17.59	28/7/2000	26.74	8/7/2013	103.03
9/3/1976	12.9	15/2/1989	18.22	4/8/2000	29.13	15/7/2013	106.2
10/3/1976	12.9	16/2/1989	18.35	11/8/2000	30.24	22/7/2013	106.61
11/3/1976	12.9	17/2/1989	18.6	18/8/2000	33.56	29/7/2013	104.61
12/3/1976	12.9	20/2/1989	18.6	25/8/2000	33.44	5/8/2013	106.61
15/3/1976	12.9	21/2/1989	18.64	1/9/2000	35.35	12/8/2013	106.19
16/3/1976	12.9	22/2/1989	18.5	8/9/2000	36.1	19/8/2013	107.14
17/3/1976	12.9	23/2/1989	18.49	15/9/2000	34.78	26/8/2013	105.88
18/3/1976	12.9	24/2/1989	18.05	22/9/2000	30.35	2/9/2013	107.98
19/3/1976	12.9	27/2/1989	18.16	29/9/2000	29.5	9/9/2013	109.62
22/3/1976	12.9	28/2/1989	18.21	6/10/2000	29.98	16/9/2013	106.54
23/3/1976	12.9	1/3/1989	18.29	13/10/2000	32.65	23/9/2013	103.62
24/3/1976	12.9	2/3/1989	18.67	20/10/2000	31.64	30/9/2013	102.36
25/3/1976	12.9	3/3/1989	18.66	27/10/2000	30.96	7/10/2013	103.07
26/3/1976	12.9	6/3/1989	18.72	3/11/2000	31.16	14/10/2013	102.46
29/3/1976	12.9	7/3/1989	18.12	10/11/2000	32.47	21/10/2013	99.28
30/3/1976	12.9	8/3/1989	18.56	17/11/2000	34.07	28/10/2013	98.74
31/3/1976	12.9	9/3/1989	18.52	24/11/2000	34.1	4/11/2013	94.58
1/4/1976	12.9	10/3/1989	18.52	1/12/2000	31.05	11/11/2013	95.13
2/4/1976	12.9	13/3/1989	19.05	8/12/2000	26.73	18/11/2013	93.03
5/4/1976	12.9	14/3/1989	19.46	15/12/2000	25.52	25/11/2013	93.86
6/4/1976	12.9	15/3/1989	19.83	22/12/2000	22.97	2/12/2013	93.84
7/4/1976	12.9	16/3/1989	19.85	29/12/2000	22.38	9/12/2013	97.33
8/4/1976	12.9	17/3/1989	20.34	5/1/2001	24.79	16/12/2013	97.41
9/4/1976	12.9	20/3/1989	19.52	12/1/2001	25.82	23/12/2013	98.62
12/4/1976	12.9	21/3/1989	20.07	19/1/2001	28.03	30/12/2013	99.28
13/4/1976	12.9	22/3/1989	20.21	26/1/2001	27.35	6/1/2014	93.5
14/4/1976	12.9	23/3/1989	20.16	2/2/2001	29.79	13/1/2014	91.83
15/4/1976	12.9	24/3/1989	20.16	9/2/2001	29.22	20/1/2014	93.34
16/4/1976	12.9	27/3/1989	20.55	16/2/2001	27.55	27/1/2014	95.82
19/4/1976	12.9	28/3/1989	19.92	23/2/2001	27.16	3/2/2014	96.44
20/4/1976	12.9	29/3/1989	20.2	2/3/2001	25.68	10/2/2014	100.12
21/4/1976	12.9	30/3/1989	21.02	9/3/2001	25.89	17/2/2014	100.89
22/4/1976	12.9	31/3/1989	20.27	16/3/2001	24.58	24/2/2014	103.17
23/4/1976	12.9	3/4/1989	20.02	23/3/2001	24.87	3/3/2014	105.04
26/4/1976	12.9	4/4/1989	20.58	30/3/2001	24.36	10/3/2014	101.09
27/4/1976	12.9	5/4/1989	20.06	6/4/2001	24.69	17/3/2014	98.13
28/4/1976	12.9	6/4/1989	19.85	13/4/2001	26.9	24/3/2014	100.05
29/4/1976	12.9	7/4/1989	20.02	20/4/2001	25.87	31/3/2014	101.57
30/4/1976	12.95	10/4/1989	20.65	27/4/2001	27.45	7/4/2014	100.43
3/5/1976	12.95	11/4/1989	20.56	4/5/2001	27.83	14/4/2014	104.05
4/5/1976	12.95	12/4/1989	20.65	11/5/2001	27.96	21/4/2014	104.35
5/5/1976	12.95	13/4/1989	20.25	18/5/2001	29.8	28/4/2014	100.84
6/5/1976	12.95	14/4/1989	20.68	25/5/2001	28.62	5/5/2014	99.45
7/5/1976	12.95	17/4/1989	21.22	1/6/2001	28.61	12/5/2014	100.6
10/5/1976	12.95	18/4/1989	21.73	8/6/2001	29.37	19/5/2014	102.66
11/5/1976	12.95	19/4/1989	22.65	15/6/2001	28.99	26/5/2014	105.01
12/5/1976	12.95	20/4/1989	24.62	22/6/2001	27.14	2/6/2014	102.42
13/5/1976	12.95	21/4/1989	23.38	29/6/2001	26.32	9/6/2014	104.44
14/5/1976	12.95	24/4/1989	20.63	6/7/2001	26.3	16/6/2014	106.87
17/5/1976	12.95	25/4/1989	21.31	13/7/2001	25.06	23/6/2014	106.83
18/5/1976	12.95	26/4/1989	21.19	20/7/2001	24.48	30/6/2014	105.37
19/5/1976	12.95	27/4/1989	20.82	27/7/2001	25.09	7/7/2014	103.49
20/5/1976	12.95	28/4/1989	20.38	3/8/2001	25.47	14/7/2014	101.03
21/5/1976	12.95	1/5/1989	20.66	10/8/2001	25.85	21/7/2014	104.64
24/5/1976	12.95	2/5/1989	19.72	17/8/2001	24.75	28/7/2014	105.68
25/5/1976	12.95	3/5/1989	20.13	24/8/2001	26.08	4/8/2014	98.26
26/5/1976	12.95	4/5/1989	20.57	31/8/2001	26.64	11/8/2014	98.09
27/5/1976	12.95	5/5/1989	20.07	7/9/2001	27.92	18/8/2014	96.44
28/5/1976	12.95	8/5/1989	19.4	14/9/2001	29.55	25/8/2014	95.39
31/5/1976	12.95	9/5/1989	19.53	21/9/2001	24.72	1/9/2014	97.86
1/6/1976	12.95	10/5/1989	19.56	28/9/2001	22.1	8/9/2014	92.64
2/6/1976	12.95	11/5/1989	20.13	5/10/2001	20.76	15/9/2014	92.86
3/6/1976	12.95	12/5/1989	20.11	12/10/2001	21.81	22/9/2014	91.46
4/6/1976	12.95	15/5/1989	20.52	19/10/2001	21.1	29/9/2014	94.53
7/6/1976	12.95	16/5/1989	20.57	26/10/2001	21.06	6/10/2014	90.33
8/6/1976	12.95	17/5/1989	20.15	2/11/2001	19.57	13/10/2014	85.73
9/6/1976	12.95	18/5/1989	20.24	9/11/2001	21.07	20/10/2014	82.76
10/6/1976	12.95	19/5/1989	20.57	16/11/2001	17.65	27/10/2014	81.26
11/6/1976	12.95	22/5/1989	20.91	23/11/2001	19.33	3/11/2014	78.77
14/6/1976	12.95	23/5/1989	21.76	30/11/2001	18.95	10/11/2014	77.43
15/6/1976	12.95	24/5/1989	19.68	7/12/2001	18.83	17/11/2014	75.64
16/6/1976	12.95	25/5/1989	19.45	14/12/2001	19.01	24/11/2014	75.74
17/6/1976	12.95	26/5/1989	19.54	21/12/2001	18.49	1/12/2014	68.98
18/6/1976	12.95	29/5/1989	19.54	28/12/2001	19.76	8/12/2014	63.13
21/6/1976	12.95	30/5/1989	19.95	4/1/2002	21.54	15/12/2014	55.96
22/6/1976	12.95	31/5/1989	19.92	11/1/2002	19.73	22/12/2014	55.25
23/6/1976	12.95	1/6/1989	19.82	18/1/2002	19.01	29/12/2014	53.46
24/6/1976	12.95	2/6/1989	20.17	25/1/2002	20.26	5/1/2015	50.03
25/6/1976	12.95	5/6/1989	20.5	1/2/2002	20.9	12/1/2015	46.06
28/6/1976	12.95	6/6/1989	20.38	8/2/2002	20.38	19/1/2015	48.49
29/6/1976	12.95	7/6/1989	19.69	15/2/2002	21	26/1/2015	44.8
30/6/1976	12.95	8/6/1989	19.94	22/2/2002	20.15	2/2/2015	49.25
1/7/1976	12.95	9/6/1989	19.86	1/3/2002	21.61	9/2/2015	52.99
2/7/1976	12.95	12/6/1989	19.29	8/3/2002	22.92	16/2/2015	52.66
5/7/1976	12.95	13/6/1989	19.5	15/3/2002	24.19	23/2/2015	49.56
6/7/1976	12.95	14/6/1989	20.36	22/3/2002	25.1	2/3/2015	49.59
7/7/1976	12.95	15/6/1989	20.55	29/3/2002	25.55	9/3/2015	49.95
8/7/1976	12.95	16/6/1989	19.97	5/4/2002	25.78	16/3/2015	43.93
9/7/1976	12.95	19/6/1989	20.88	12/4/2002	23.96	23/3/2015	47.4
12/7/1976	12.95	20/6/1989	19.88	19/4/2002	26.58	30/3/2015	48.66
13/7/1976	12.95	21/6/1989	19.73	26/4/2002	26.73	6/4/2015	52.08
14/7/1976	12.95	22/6/1989	19.52	3/5/2002	26.22	13/4/2015	51.95
15/7/1976	12.95	23/6/1989	19.71	10/5/2002	26.25	20/4/2015	56.37
16/7/1976	12.95	26/6/1989	20.27	17/5/2002	26.09	27/4/2015	55.56
19/7/1976	12.95	27/6/1989	20.38	24/5/2002	24.46	4/5/2015	58.92
20/7/1976	12.95	28/6/1989	20.03	31/5/2002	23.81	11/5/2015	59.23
21/7/1976	12.95	29/6/1989	20.26	7/6/2002	23.33	18/5/2015	59.44
22/7/1976	12.95	30/6/1989	20.28	14/6/2002	24.82	25/5/2015	58.88
23/7/1976	12.95	3/7/1989	20.55	21/6/2002	24.66	1/6/2015	60.24
26/7/1976	12.95	4/7/1989	20.28	28/6/2002	25.77	8/6/2015	58.15
27/7/1976	12.95	5/7/1989	20.98	5/7/2002	25.82	15/6/2015	59.53
28/7/1976	12.95	6/7/1989	20.35	12/7/2002	26.43	22/6/2015	60.01
29/7/1976	12.95	7/7/1989	20.77	19/7/2002	26.79	29/6/2015	58.34
30/7/1976	13.15	10/7/1989	20.38	26/7/2002	25.22	6/7/2015	52.48
2/8/1976	13.15	11/7/1989	20.74	2/8/2002	25.71	13/7/2015	52.19
3/8/1976	13.15	12/7/1989	20.19	9/8/2002	25.58	20/7/2015	50.11
4/8/1976	13.15	13/7/1989	20.42	16/8/2002	27.33	27/7/2015	47.17
5/8/1976	13.15	14/7/1989	20.35	23/8/2002	27.15	3/8/2015	45.25
6/8/1976	13.15	17/7/1989	20.48	30/8/2002	27.65	10/8/2015	44.94
9/8/1976	13.15	18/7/1989	20.2	6/9/2002	28.31	17/8/2015	41.93
10/8/1976	13.15	19/7/1989	19.82	13/9/2002	28.75	24/8/2015	38.22
11/8/1976	13.15	20/7/1989	19.92	20/9/2002	28.44	31/8/2015	49.2
12/8/1976	13.15	21/7/1989	19.86	27/9/2002	28.99	7/9/2015	46.02
13/8/1976	13.15	24/7/1989	18.76	4/10/2002	28.45	14/9/2015	44.07
16/8/1976	13.15	25/7/1989	18.52	11/10/2002	28.11	21/9/2015	46.67
17/8/1976	13.15	26/7/1989	18.32	18/10/2002	28.22	28/9/2015	44.4
18/8/1976	13.15	27/7/1989	18.14	25/10/2002	25.94	5/10/2015	46.28
19/8/1976	13.15	28/7/1989	17.96	1/11/2002	25.39	12/10/2015	47.09
20/8/1976	13.15	31/7/1989	18.33	8/11/2002	23.58	19/10/2015	45.91
23/8/1976	13.15	1/8/1989	17.9	15/11/2002	23.31	26/10/2015	43.19
24/8/1976	13.15	2/8/1989	18.28	22/11/2002	25.17	2/11/2015	46.12
25/8/1976	13.15	3/8/1989	18.17	29/11/2002	25.26	9/11/2015	43.87
26/8/1976	13.15	4/8/1989	18.05	6/12/2002	25.85	16/11/2015	41.68
27/8/1976	13.15	7/8/1989	17.91	13/12/2002	27.3	23/11/2015	39.27
30/8/1976	13.15	8/8/1989	18.05	20/12/2002	29.65	30/11/2015	40.43
31/8/1976	13.15	9/8/1989	18.23	27/12/2002	31.3	7/12/2015	37.64
1/9/1976	13.15	10/8/1989	18.57	3/1/2003	32.15	14/12/2015	36.31
2/9/1976	13.15	11/8/1989	18.45	10/1/2003	29.72	21/12/2015	34.55
3/9/1976	13.15	14/8/1989	18.59	17/1/2003	31.5	28/12/2015	36.36
6/9/1976	13.15	15/8/1989	18.77	24/1/2003	31.03	4/1/2016	36.81
7/9/1976	13.15	16/8/1989	18.98	31/1/2003	31.49	11/1/2016	31.42
8/9/1976	13.15	17/8/1989	18.67	7/2/2003	32.42	18/1/2016	29.45
9/9/1976	13.15	18/8/1989	18.81	14/2/2003	33.34	25/1/2016	30.31
10/9/1976	13.15	21/8/1989	19.1	21/2/2003	32.86	1/2/2016	31.62
13/9/1976	13.15	22/8/1989	19	28/2/2003	33.8	8/2/2016	29.71
14/9/1976	13.15	23/8/1989	19.15	7/3/2003	34.23	15/2/2016	29.32
15/9/1976	13.15	24/8/1989	19.02	14/3/2003	30.99	22/2/2016	31.37
16/9/1976	13.15	25/8/1989	18.53	21/3/2003	24.87	29/2/2016	32.74
17/9/1976	13.15	28/8/1989	18.68	28/3/2003	27.3	7/3/2016	37.9
20/9/1976	13.15	29/8/1989	18.58	4/4/2003	25.41	14/3/2016	37.2
21/9/1976	13.15	30/8/1989	18.84	11/4/2003	24.78	21/3/2016	39.91
22/9/1976	13.15	31/8/1989	18.82	18/4/2003	25.26	28/3/2016	39.41
23/9/1976	13.15	1/9/1989	18.88	25/4/2003	24.05	4/4/2016	35.72
24/9/1976	13.15	4/9/1989	18.88	2/5/2003	23.59	11/4/2016	40.46
27/9/1976	13.15	5/9/1989	19.07	9/5/2003	25.17	18/4/2016	39.74
28/9/1976	13.15	6/9/1989	19.4	16/5/2003	26.94	25/4/2016	41.67
29/9/1976	13.15	7/9/1989	19.39	23/5/2003	26.75	2/5/2016	44.75
30/9/1976	13.15	8/9/1989	19.76	30/5/2003	26.84	9/5/2016	43.45
1/10/1976	13.15	11/9/1989	19.76	6/6/2003	27.86	16/5/2016	47.72
4/10/1976	13.15	12/9/1989	19.67	13/6/2003	26.99	23/5/2016	48.12
5/10/1976	13.15	13/9/1989	19.86	20/6/2003	27.23	30/5/2016	49.36
6/10/1976	13.15	14/9/1989	19.73	27/6/2003	27.67	6/6/2016	49.71
7/10/1976	13.15	15/9/1989	19.95	4/7/2003	27.77	13/6/2016	48.89
8/10/1976	13.15	18/9/1989	19.87	11/7/2003	29.26	20/6/2016	49.4
11/10/1976	13.15	19/9/1989	19.67	18/7/2003	29.23	27/6/2016	45.8
12/10/1976	13.15	20/9/1989	19.67	25/7/2003	28.37	4/7/2016	49.02
13/10/1976	13.15	21/9/1989	19.68	1/8/2003	30.27	11/7/2016	44.73
14/10/1976	13.15	22/9/1989	19.2	8/8/2003	30.09	18/7/2016	45.23
15/10/1976	13.15	25/9/1989	19.49	15/8/2003	29.22	25/7/2016	42.4
18/10/1976	13.15	26/9/1989	19.61	22/8/2003	30.12	1/8/2016	40.05
19/10/1976	13.15	27/9/1989	19.6	29/8/2003	29.87	8/8/2016	43.06
20/10/1976	13.15	28/9/1989	19.98	5/9/2003	27.32	15/8/2016	45.72
21/10/1976	13.15	29/9/1989	20.14	12/9/2003	26.73	22/8/2016	46.8
22/10/1976	13.15	2/10/1989	19.99	19/9/2003	25.47	29/8/2016	46.97
25/10/1976	13.15	3/10/1989	20.14	26/9/2003	27.06	5/9/2016	44.39
26/10/1976	13.15	4/10/1989	20.16	3/10/2003	29.39	12/9/2016	46.28
27/10/1976	13.15	5/10/1989	19.95	10/10/2003	31.04	19/9/2016	43.34
28/10/1976	13.15	6/10/1989	19.88	17/10/2003	29.78	26/9/2016	45.6
29/10/1976	13.56	9/10/1989	20.03	24/10/2003	29.36	3/10/2016	48.8
1/11/1976	13.56	10/10/1989	20.2	31/10/2003	28.15	10/10/2016	49.76
2/11/1976	13.56	11/10/1989	20.17	7/11/2003	28.98	17/10/2016	49.97
3/11/1976	13.56	12/10/1989	20.48	14/11/2003	29.84	24/10/2016	50.18
4/11/1976	13.56	13/10/1989	20.9	21/11/2003	29.44	31/10/2016	46.83
5/11/1976	13.56	16/10/1989	20.63	28/11/2003	28.67	7/11/2016	44.88
8/11/1976	13.56	17/10/1989	20.67	5/12/2003	28.88	14/11/2016	43.29
9/11/1976	13.56	18/10/1989	20.57	12/12/2003	30.46	21/11/2016	47.48
10/11/1976	13.56	19/10/1989	20.37	19/12/2003	30.44	28/11/2016	45.66
11/11/1976	13.56	20/10/1989	20.03	26/12/2003	29.32	5/12/2016	51.72
12/11/1976	13.56	23/10/1989	19.67	2/1/2004	29.67	12/12/2016	52.74
15/11/1976	13.56	24/10/1989	19.69	9/1/2004	31.5	19/12/2016	52.13
16/11/1976	13.56	25/10/1989	19.59	16/1/2004	31.27	26/12/2016	52.01
17/11/1976	13.56	26/10/1989	19.47	23/1/2004	31.61	2/1/2017	53.75
18/11/1976	13.56	27/10/1989	19.78	30/1/2004	29.66	9/1/2017	51.95
19/11/1976	13.56	30/10/1989	19.73	6/2/2004	28.97	16/1/2017	52.36
22/11/1976	13.56	31/10/1989	19.88	13/2/2004	31	23/1/2017	52.77
23/11/1976	13.56	1/11/1989	20.08	20/2/2004	31.3	30/1/2017	52.63
24/11/1976	13.56	2/11/1989	20.01	27/2/2004	33.15	6/2/2017	53.01
25/11/1976	13.56	3/11/1989	20.22	5/3/2004	34.38	13/2/2017	52.96
26/11/1976	13.56	6/11/1989	20.06	12/3/2004	32.45	20/2/2017	53.41
29/11/1976	13.56	7/11/1989	19.96	19/3/2004	34.48	27/2/2017	54.04
30/11/1976	13.56	8/11/1989	19.96	26/3/2004	32.76	6/3/2017	53.19
1/12/1976	13.56	9/11/1989	19.61	2/4/2004	30.89	13/3/2017	47.95
2/12/1976	13.56	10/11/1989	19.84	9/4/2004	33.52	20/3/2017	47.79
3/12/1976	13.56	13/11/1989	19.61	16/4/2004	33.86	27/3/2017	47.02
6/12/1976	13.56	14/11/1989	19.57	23/4/2004	33.33	3/4/2017	50.25
7/12/1976	13.56	15/11/1989	19.68	30/4/2004	34.9	10/4/2017	53.06
8/12/1976	13.56	16/11/1989	19.88	7/5/2004	37.17	17/4/2017	52.62
9/12/1976	13.56	17/11/1989	19.92	14/5/2004	38.79	24/4/2017	48.9
10/12/1976	13.56	20/11/1989	20.13	21/5/2004	37.31	1/5/2017	48.83
13/12/1976	13.56	21/11/1989	20.51	28/5/2004	37.08	8/5/2017	46.46
14/12/1976	13.56	22/11/1989	19.8	4/6/2004	35.58	15/5/2017	48.86
15/12/1976	13.56	23/11/1989	19.8	11/6/2004	35.53	22/5/2017	50.81
16/12/1976	13.56	24/11/1989	19.83	18/6/2004	35.95	29/5/2017	49.58
17/12/1976	13.56	27/11/1989	19.64	25/6/2004	34.66	5/6/2017	47.4
20/12/1976	13.56	28/11/1989	19.32	2/7/2004	35.5	12/6/2017	46.1
21/12/1976	13.56	29/11/1989	19.4	9/7/2004	37.2	19/6/2017	44.24
22/12/1976	13.56	30/11/1989	19.86	16/7/2004	38.81	26/6/2017	43.24
23/12/1976	13.56	1/12/1989	20.25	23/7/2004	39.41	3/7/2017	46.02
24/12/1976	13.56	4/12/1989	20.23	30/7/2004	41.65	10/7/2017	44.4
27/12/1976	13.56	5/12/1989	20.21	6/8/2004	40.76	17/7/2017	46.02
28/12/1976	13.56	6/12/1989	20.46	13/8/2004	43.86	24/7/2017	46.21
29/12/1976	13.56	7/12/1989	20.44	20/8/2004	44.13	31/7/2017	50.21
30/12/1976	13.56	8/12/1989	20.4	27/8/2004	40.7	7/8/2017	49.37
31/12/1976	13.56	11/12/1989	20.68	3/9/2004	41.4	14/8/2017	47.59
3/1/1977	13.56	12/12/1989	20.8	10/9/2004	41.59	21/8/2017	47.39
4/1/1977	13.56	13/12/1989	20.75	17/9/2004	42.9	28/8/2017	46.4
5/1/1977	13.56	14/12/1989	20.66	24/9/2004	45.92	4/9/2017	47.32
6/1/1977	13.56	15/12/1989	21.13	1/10/2004	47.01	11/9/2017	48.06
7/1/1977	13.56	18/12/1989	22.2	8/10/2004	49.44	18/9/2017	49.88
10/1/1977	13.56	19/12/1989	22.16	15/10/2004	50.71	25/9/2017	51.85
11/1/1977	13.56	20/12/1989	21.57	22/10/2004	52.22
12/1/1977	13.56	21/12/1989	21.52	29/10/2004	48.42
13/1/1977	13.56	22/12/1989	21.3	5/11/2004	45.76
14/1/1977	13.56	25/12/1989	21.3	12/11/2004	42.52
17/1/1977	13.56	26/12/1989	21.91	19/11/2004	43.21
18/1/1977	13.56	27/12/1989	21.77	26/11/2004	43.55
19/1/1977	13.56	28/12/1989	21.6	3/12/2004	38.19
20/1/1977	13.56	29/12/1989	21.83	10/12/2004	39.98
21/1/1977	13.56	1/1/1990	21.83	17/12/2004	43.03
24/1/1977	13.56	2/1/1990	22.88	24/12/2004	40.6
25/1/1977	13.56	3/1/1990	23.8	31/12/2004	40
26/1/1977	13.56	4/1/1990	23.41	7/1/2005	43.22
27/1/1977	13.56	5/1/1990	23.06	14/1/2005	45.48
28/1/1977	13.56	8/1/1990	21.63	21/1/2005	45.87
31/1/1977	14.45	9/1/1990	22.24	28/1/2005	45.29
1/2/1977	14.45	10/1/1990	22.9	4/2/2005	44.09
2/2/1977	14.45	11/1/1990	23.14	11/2/2005	44.76
3/2/1977	14.45	12/1/1990	23.16	18/2/2005	45.94
4/2/1977	14.45	15/1/1990	22.35	25/2/2005	49.79
7/2/1977	14.45	16/1/1990	22.6	4/3/2005	52.22
8/2/1977	14.45	17/1/1990	22.1	11/3/2005	53.35
9/2/1977	14.45	18/1/1990	22.77	18/3/2005	55.78
10/2/1977	14.45	19/1/1990	23.69	25/3/2005	53.23
11/2/1977	14.45	22/1/1990	22.56	1/4/2005	54.53
14/2/1977	14.45	23/1/1990	22.34	8/4/2005	52.7
15/2/1977	14.45	24/1/1990	23.42	15/4/2005	50.31
16/2/1977	14.45	25/1/1990	24.47	22/4/2005	54.01
17/2/1977	14.45	26/1/1990	22.56	29/4/2005	51.51
18/2/1977	14.45	29/1/1990	22.79	6/5/2005	51.39
21/2/1977	14.45	30/1/1990	22.28	13/5/2005	47.87
22/2/1977	14.45	31/1/1990	22.68	20/5/2005	47.45
23/2/1977	14.45	1/2/1990	22.7	27/5/2005	49.96
24/2/1977	14.45	2/2/1990	23.03	3/6/2005	52.62
25/2/1977	14.45	5/2/1990	22.43	10/6/2005	53.18
28/2/1977	14.45	6/2/1990	22.36	17/6/2005	56.71
1/3/1977	14.45	7/2/1990	22.39	24/6/2005	57.17
2/3/1977	14.45	8/2/1990	22.11	1/7/2005	56.69
3/3/1977	14.45	9/2/1990	21.81	8/7/2005	59.71
4/3/1977	14.45	12/2/1990	22.02	15/7/2005	56.91
7/3/1977	14.45	13/2/1990	21.88	22/7/2005	56.96
8/3/1977	14.45	14/2/1990	22.12	29/7/2005	59.64
9/3/1977	14.45	15/2/1990	22.85	5/8/2005	60.68
10/3/1977	14.45	16/2/1990	22.45	12/8/2005	66.73
11/3/1977	14.45	19/2/1990	22.45	19/8/2005	64.5
14/3/1977	14.45	20/2/1990	22.2	26/8/2005	66.16
15/3/1977	14.45	21/2/1990	21.86	2/9/2005	66.35
16/3/1977	14.45	22/2/1990	21.39	9/9/2005	63.4
17/3/1977	14.45	23/2/1990	21.13	16/9/2005	61.08
18/3/1977	14.45	26/2/1990	21.81	23/9/2005	62.04
21/3/1977	14.45	27/2/1990	21.62	30/9/2005	62.09
22/3/1977	14.45	28/2/1990	21.54	7/10/2005	58.45
23/3/1977	14.45	1/3/1990	21.18	14/10/2005	58.8
24/3/1977	14.45	2/3/1990	21.35	21/10/2005	56.75
25/3/1977	14.45	5/3/1990	21.61	28/10/2005	59.3
28/3/1977	14.45	6/3/1990	21.3	4/11/2005	60.06
29/3/1977	14.45	7/3/1990	20.93	11/11/2005	54.81
30/3/1977	14.45	8/3/1990	20.79	18/11/2005	53.25
31/3/1977	14.45	9/3/1990	20.41	25/11/2005	53.51
1/4/1977	14.45	12/3/1990	20.25	2/12/2005	55.52
4/4/1977	14.45	13/3/1990	20.14	9/12/2005	58.5
5/4/1977	14.45	14/3/1990	20.06	16/12/2005	58.01
6/4/1977	14.45	15/3/1990	20.38	23/12/2005	56.35
7/4/1977	14.45	16/3/1990	20.08	30/12/2005	58.33
8/4/1977	14.45	19/3/1990	19.59	6/1/2006	62.27
11/4/1977	14.45	20/3/1990	19.34	13/1/2006	62.2
12/4/1977	14.45	21/3/1990	19.58	20/1/2006	65.84
13/4/1977	14.45	22/3/1990	19.85	27/1/2006	65.46
14/4/1977	14.45	23/3/1990	20.28	3/2/2006	62.97
15/4/1977	14.45	26/3/1990	20.47	10/2/2006	60.51
18/4/1977	14.45	27/3/1990	20.35	17/2/2006	58.67
19/4/1977	14.45	28/3/1990	20.09	24/2/2006	60.9
20/4/1977	14.45	29/3/1990	20.03	3/3/2006	62.74
21/4/1977	14.45	30/3/1990	20.33	10/3/2006	61.07
22/4/1977	14.45	2/4/1990	20.51	17/3/2006	63.69
25/4/1977	14.45	3/4/1990	20.22	24/3/2006	63.2
26/4/1977	14.45	4/4/1990	19.78	31/3/2006	66.14
27/4/1977	14.45	5/4/1990	19.47	7/4/2006	67.24
28/4/1977	14.45	6/4/1990	19.15	14/4/2006	69.64
29/4/1977	14.45	9/4/1990	18.31	21/4/2006	73.75
2/5/1977	14.45	10/4/1990	17.55	28/4/2006	71.92
3/5/1977	14.45	11/4/1990	18.18	5/5/2006	70.63
4/5/1977	14.45	12/4/1990	17.75	12/5/2006	72.71
5/5/1977	14.45	13/4/1990	17.75	19/5/2006	67.69
6/5/1977	14.45	16/4/1990	17.86	26/5/2006	70.36
9/5/1977	14.45	17/4/1990	17.36	2/6/2006	69.38
10/5/1977	14.45	18/4/1990	16.94	9/6/2006	70.05
11/5/1977	14.45	19/4/1990	17.92	16/6/2006	66.52
12/5/1977	14.45	20/4/1990	17.9	23/6/2006	69.85
13/5/1977	14.45	23/4/1990	18.6	30/6/2006	73.04
16/5/1977	14.45	24/4/1990	17.85	7/7/2006	74.87
17/5/1977	14.45	25/4/1990	17.48	14/7/2006	76.91
18/5/1977	14.45	26/4/1990	18.49	21/7/2006	73.55
19/5/1977	14.45	27/4/1990	18.57	28/7/2006	73.54
20/5/1977	14.45	30/4/1990	18.5	4/8/2006	76.66
23/5/1977	14.45	1/5/1990	18.75	11/8/2006	75.64
24/5/1977	14.45	2/5/1990	18.63	18/8/2006	71.48
25/5/1977	14.45	3/5/1990	17.97	25/8/2006	72.17
26/5/1977	14.45	4/5/1990	17.97	1/9/2006	68.06
27/5/1977	14.45	7/5/1990	18.29	8/9/2006	65.97
30/5/1977	14.45	8/5/1990	18.25	15/9/2006	60.85
31/5/1977	14.45	9/5/1990	19	22/9/2006	59.14
1/6/1977	14.45	10/5/1990	19.02	29/9/2006	59.86
2/6/1977	14.45	11/5/1990	18.96	6/10/2006	58.99
3/6/1977	14.45	14/5/1990	19.73	13/10/2006	59.94
6/6/1977	14.45	15/5/1990	19.51	20/10/2006	58.44
7/6/1977	14.45	16/5/1990	19.05	27/10/2006	58.99
8/6/1977	14.45	17/5/1990	18.88	3/11/2006	56.25
9/6/1977	14.45	18/5/1990	18.77	10/11/2006	60.27
10/6/1977	14.45	21/5/1990	18.26	17/11/2006	57.11
13/6/1977	14.45	22/5/1990	17.5	24/11/2006	60.27
14/6/1977	14.45	23/5/1990	16.24	1/12/2006	64.44
15/6/1977	14.45	24/5/1990	16.01	8/12/2006	63.93
16/6/1977	14.45	25/5/1990	16.11	15/12/2006	62.66
17/6/1977	14.45	28/5/1990	16.11	22/12/2006	62.28
20/6/1977	14.45	29/5/1990	18	29/12/2006	59.44
21/6/1977	14.45	30/5/1990	17.88	5/1/2007	54.62
22/6/1977	14.45	31/5/1990	17.46	12/1/2007	51.91
23/6/1977	14.45	1/6/1990	17.5	19/1/2007	52.6
24/6/1977	14.45	4/6/1990	17.09	26/1/2007	55.22
27/6/1977	14.45	5/6/1990	16.4	2/2/2007	57.1
28/6/1977	14.45	6/6/1990	16.91	9/2/2007	58.15
29/6/1977	14.45	7/6/1990	16.64	16/2/2007	57.15
30/6/1977	14.45	8/6/1990	16.77	23/2/2007	60.01
1/7/1977	14.45	11/6/1990	16.82	2/3/2007	61.6
4/7/1977	14.45	12/6/1990	17.38	9/3/2007	61.42
5/7/1977	14.45	13/6/1990	17.59	16/3/2007	61.13
6/7/1977	14.45	14/6/1990	17.1	23/3/2007	63.42
7/7/1977	14.45	15/6/1990	16.63	30/3/2007	68.5
8/7/1977	14.45	18/6/1990	15.92	6/4/2007	68.08
11/7/1977	14.45	19/6/1990	15.55	13/4/2007	69.26
12/7/1977	14.45	20/6/1990	15.42	20/4/2007	66.34
13/7/1977	14.45	21/6/1990	16.09	27/4/2007	67.57
14/7/1977	14.45	22/6/1990	16.49	4/5/2007	66.09
15/7/1977	14.45	25/6/1990	16.15	11/5/2007	66.24
18/7/1977	14.45	26/6/1990	17.11	18/5/2007	69.45
19/7/1977	14.45	27/6/1990	16.69	25/5/2007	70.2
20/7/1977	14.45	28/6/1990	17.17	1/6/2007	68.22
21/7/1977	14.45	29/6/1990	17.04	8/6/2007	70.22
22/7/1977	14.45	2/7/1990	16.93	15/6/2007	71.58
25/7/1977	14.45	3/7/1990	16.72	22/6/2007	71.44
26/7/1977	14.45	4/7/1990	16.72	29/6/2007	71.12
27/7/1977	14.45	5/7/1990	16.5	6/7/2007	75.79
28/7/1977	14.45	6/7/1990	16.48	13/7/2007	77.27
29/7/1977	14.28	9/7/1990	16.63	20/7/2007	78.33
1/8/1977	14.28	10/7/1990	17.04	27/7/2007	76.9
2/8/1977	14.28	11/7/1990	17.45	3/8/2007	75.84
3/8/1977	14.28	12/7/1990	18.68	10/8/2007	69.83
4/8/1977	14.28	13/7/1990	18.37	17/8/2007	70.38
5/8/1977	14.28	16/7/1990	18.67	24/8/2007	70.33
8/8/1977	14.28	17/7/1990	18.22	31/8/2007	72.49
9/8/1977	14.28	18/7/1990	18.56	7/9/2007	74.55
10/8/1977	14.28	19/7/1990	19.06	14/9/2007	77.4
11/8/1977	14.28	20/7/1990	19.6	21/9/2007	79.57
12/8/1977	14.28	23/7/1990	19.88	28/9/2007	80.84
15/8/1977	14.28	24/7/1990	19.83	5/10/2007	78.83
16/8/1977	14.28	25/7/1990	19.33	12/10/2007	80.53
17/8/1977	14.28	26/7/1990	20.32	19/10/2007	84.6
18/8/1977	14.28	27/7/1990	20.06	26/10/2007	88.58
19/8/1977	14.28	30/7/1990	20.24	2/11/2007	91.85
22/8/1977	14.28	31/7/1990	20.56	9/11/2007	93.06
23/8/1977	14.28	1/8/1990	21.59	16/11/2007	92.08
24/8/1977	14.28	2/8/1990	23.71	23/11/2007	96.05
25/8/1977	14.28	3/8/1990	23.79	30/11/2007	88.66
26/8/1977	14.28	6/8/1990	28.72	7/12/2007	89.01
29/8/1977	14.28	7/8/1990	29.6	14/12/2007	92.46
30/8/1977	14.28	8/8/1990	26.18	21/12/2007	91.62
31/8/1977	14.28	9/8/1990	25.68	28/12/2007	96.02
1/9/1977	14.28	10/8/1990	26.38	4/1/2008	97.03
2/9/1977	14.28	13/8/1990	27.07	11/1/2008	91.61
5/9/1977	14.28	14/8/1990	26.69	18/1/2008	89.74
6/9/1977	14.28	15/8/1990	26.53	25/1/2008	90.96
7/9/1977	14.28	16/8/1990	27.4	1/2/2008	90.96
8/9/1977	14.28	17/8/1990	28.64	8/2/2008	90.87
9/9/1977	14.28	20/8/1990	28.63	15/2/2008	96.01
12/9/1977	14.28	21/8/1990	28.46	22/2/2008	96.43
13/9/1977	14.28	22/8/1990	30.52	29/2/2008	100.8
14/9/1977	14.28	23/8/1990	31.66	7/3/2008	103.76
15/9/1977	14.28	24/8/1990	31.1	14/3/2008	107.37
16/9/1977	14.28	27/8/1990	27.36	21/3/2008	99.6
19/9/1977	14.28	28/8/1990	27.73	28/3/2008	103.82
20/9/1977	14.28	29/8/1990	26.14	4/4/2008	103.23
21/9/1977	14.28	30/8/1990	26.96	11/4/2008	108.21
22/9/1977	14.28	31/8/1990	27.44	18/4/2008	112.65
23/9/1977	14.28	3/9/1990	27.44	25/4/2008	117.18
26/9/1977	14.28	4/9/1990	29.29	2/5/2008	113.78
27/9/1977	14.28	5/9/1990	29.99	9/5/2008	123.81
[truncated: 10,438 more rows]
